# Supplementary material for: Facile synthesis of substituted 2-aroylbenzo[ b ]thiophen-3-ols to form novel triazole hybrids using click chemistry
Source: Royal Society of Chemistry journal article supplement (doi:10.1039/d4ra01146e), 2024-01-01

## Supplementary Information

### Facile Synthesis of Substituted 2-Aroylbenzo[*b*]thiophen-3-ols to Approach Novel Triazole Hybrids Using Click Chemistry

Asma Mukhtar, <sup>a</sup> Arif Hussain, <sup>a</sup> Faiza Younas, <sup>a</sup> Sammer Yousuf <sup>b</sup> and Muhammad Saeed<sup>\*,a</sup>

<sup>a</sup> Department of Chemistry and Chemical Engineering, Syed Babar Ali School of Science and Engineering, Lahore University of Management Sciences, Lahore 54792, Pakistan.

E-mail: [Muhammad.saeed@lums.edu.pk](mailto:Muhammad.saeed@lums.edu.pk)

<sup>b</sup> H.E.J Research Institute of Chemistry, International Center for Chemical and Biological Sciences, University of Karachi, Karachi 75270, Pakistan.

#### Table of contents

|                                                           |     |
|-----------------------------------------------------------|-----|
| General Information.....                                  | S2  |
| Crystal data and Structure refinement (CCDC 2297186)..... | S3  |
| Spectroscopic Data                                        |     |
| 5a.....                                                   | S4  |
| 5b.....                                                   | S6  |
| 5c.....                                                   | S8  |
| 5d.....                                                   | S10 |
| 5e.....                                                   | S12 |
| 5f.....                                                   | S14 |
| 5g.....                                                   | S16 |
| 5h.....                                                   | S18 |
| 5i.....                                                   | S20 |
| 5j.....                                                   | S22 |
| 5k.....                                                   | S24 |
| 5l.....                                                   | S26 |
| 5m.....                                                   | S28 |
| 5n.....                                                   | S30 |
| 5o.....                                                   | S32 |
| 5p.....                                                   | S34 |
| 5q.....                                                   | S36 |
| 5r.....                                                   | S38 |
| 5s.....                                                   | S40 |
| 11a.....                                                  | S42 |
| 11b.....                                                  | S44 |
| 11c.....                                                  | S46 |
| 14a.....                                                  | S48 |
| 14b.....                                                  | S50 |
| 14c.....                                                  | S52 |

## General Information

All the chemicals and reagents were purchased from different vendors (Merck, Sigma Aldrich & TCI) and were used without further purification. Solvents for syntheses and chromatographic work were distilled and properly dried before use (if required). The progress of reactions was monitored by TLC plates (Aluminium sheet pre-coated with silica gel) by visualizing under the UV lamp at 254 nm wavelength. The reaction mixtures were purified using silica gel column chromatography (pore size 60 Å, 230-400 mesh size, 40-63 µm). FTIR spectra were recorded using Bruker Alpha Platinum AT applying ATR sampling technique through neat samples. NMR spectra were recorded in deuterated solvent using Bruker 600 MHz NMR instrument (Avance Neo Bruker). GCMS data were obtained using 1300 GC-MS (Thermo Scientific). Melting points were measured by using "STUART SMP3" apparatus.

**Table S1.** Crystal data and structure refinement (CCDC 2297186)

|                                                                            |                                                                        |
|----------------------------------------------------------------------------|------------------------------------------------------------------------|
| Chemical formula                                                           | C <sub>16</sub> H <sub>9</sub> F <sub>3</sub> O <sub>2</sub> S         |
| $M_r$                                                                      | 322.29                                                                 |
| Crystal system, space group                                                | triclinic, <i>P-1</i>                                                  |
| Temperature (K)                                                            | 100(2)                                                                 |
| $a, b, c$ (Å)                                                              | 6.5671(10), 7.2171(11), 14.364(2)                                      |
| $\alpha$                                                                   | 85.588(4)°                                                             |
| $\beta$                                                                    | 81.019(4)°                                                             |
| $\gamma$                                                                   | 83.178(4)°                                                             |
| $V$ (Å <sup>3</sup> )                                                      | 1117.9 (3)                                                             |
| $Z$                                                                        | 4                                                                      |
| Radiation type                                                             | Mo $K\alpha$                                                           |
| $\mu$ (mm <sup>-1</sup> )                                                  | 0.27                                                                   |
| Crystal size (mm)                                                          | 0.39 × 0.27 × 0.08                                                     |
| Diffractionmeter                                                           | Bruker AXS <i>SMART APEX</i>                                           |
| Absorption correction                                                      | Multi-scan<br>( <i>SADABS</i> ; Sheldrick, 2004)                       |
| $T_{\min}, T_{\max}$                                                       | 0.901, 0.979                                                           |
| No. of measured, independent and observed [ $I > 2\sigma(I)$ ] reflections | 10330, 2652, 2171                                                      |
| $R_{\text{int}}$                                                           | 0.039                                                                  |
| $(\sin \theta/\lambda)_{\text{max}}$ (Å <sup>-1</sup> )                    | 0.658                                                                  |
| $R[F^2 > 2\sigma(F^2)], wR(F^2), S$                                        | 0.043, 0.095, 1.06                                                     |
| No. of reflections                                                         | 2652                                                                   |
| No. of parameters                                                          | 140                                                                    |
| H-atom treatment                                                           | H atoms treated by a mixture of independent and constrained refinement |
| $\Delta\rho_{\text{max}}, \Delta\rho_{\text{min}}$ (e Å <sup>-3</sup> )    | 0.39, -0.37                                                            |

**Spectroscopic Data (<sup>1</sup>H NMR and <sup>13</sup>C NMR Scans)**

**3-hydroxybenzo[b]thiophen-2-yl)(phenyl)methanone (5a).**

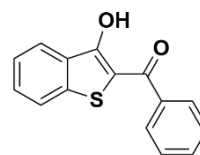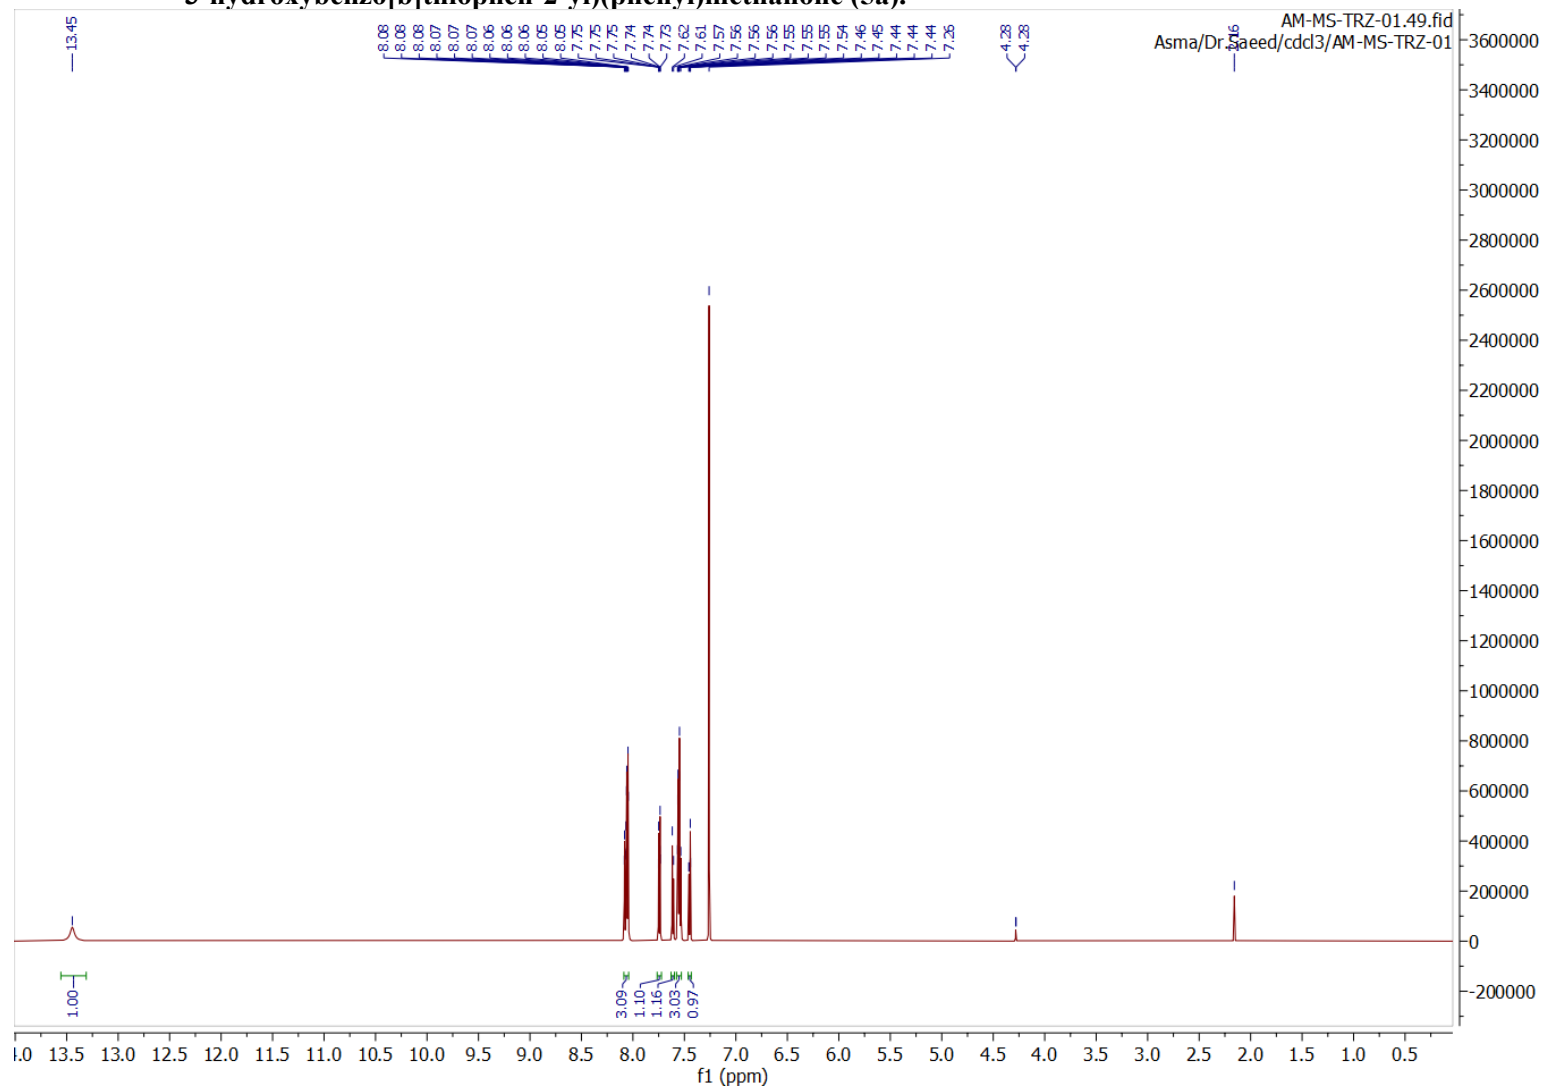

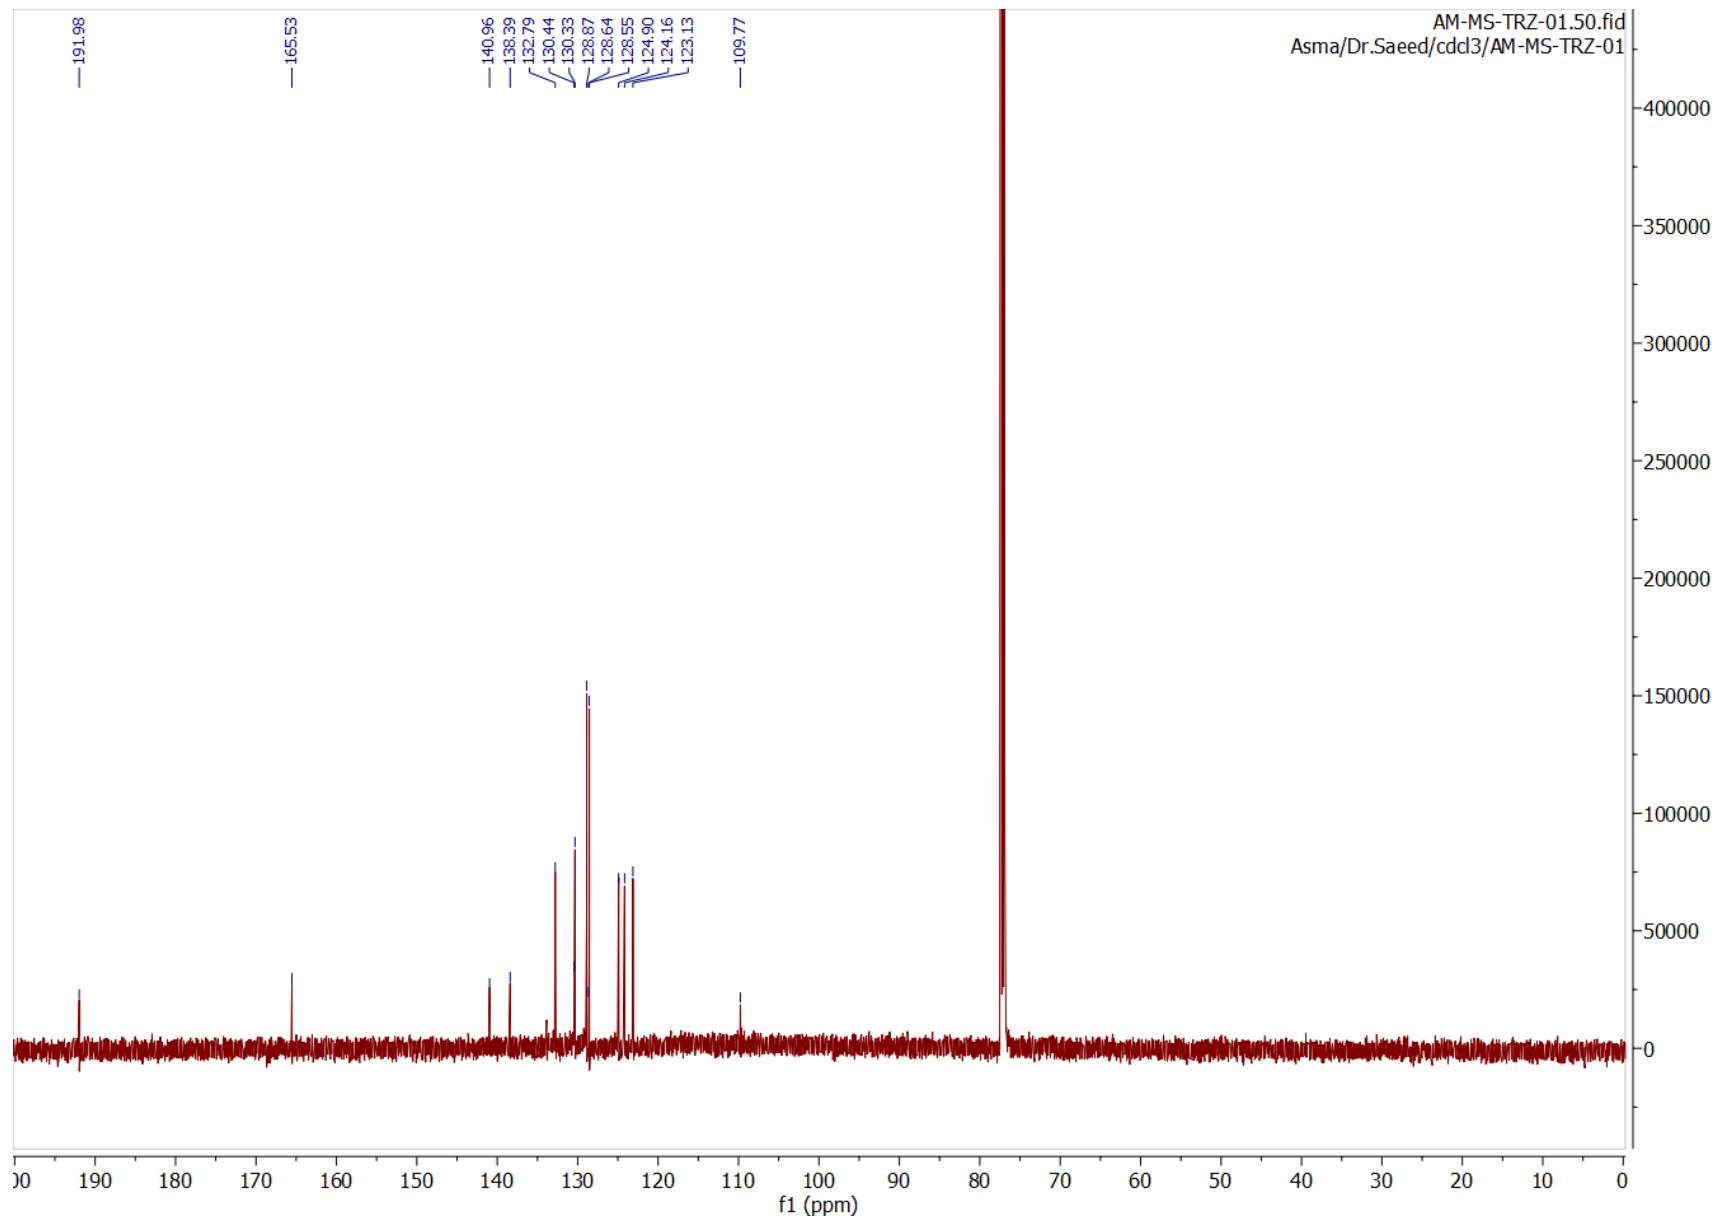

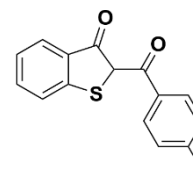

(3-hydroxybenzo[b]thiophen-2-yl)(p-tolyl)methanone (5b)

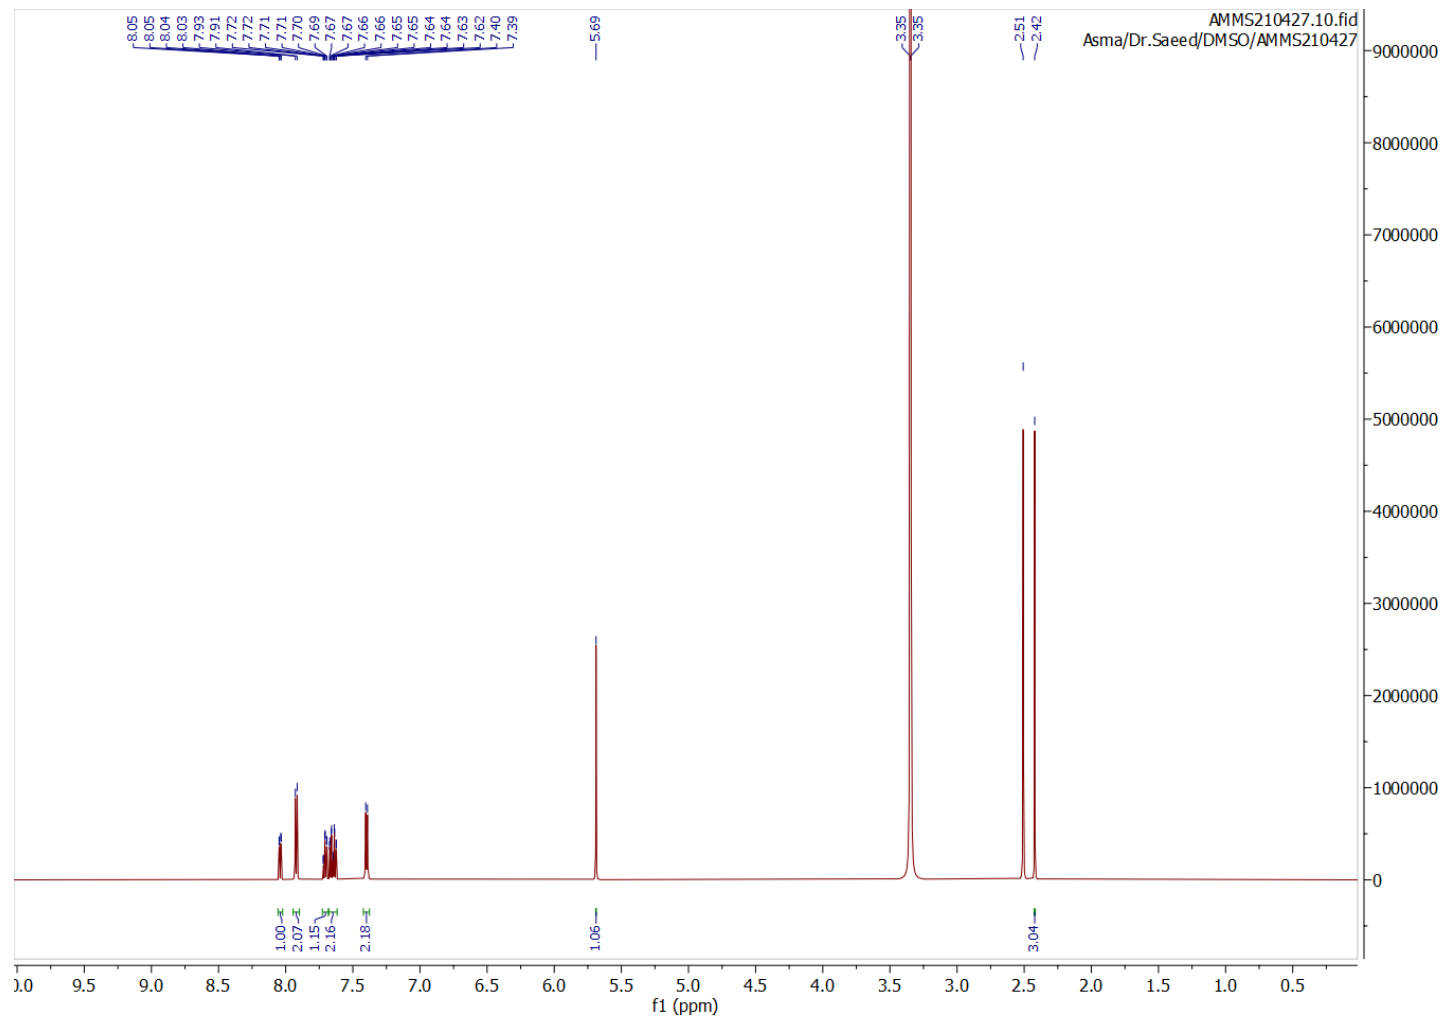

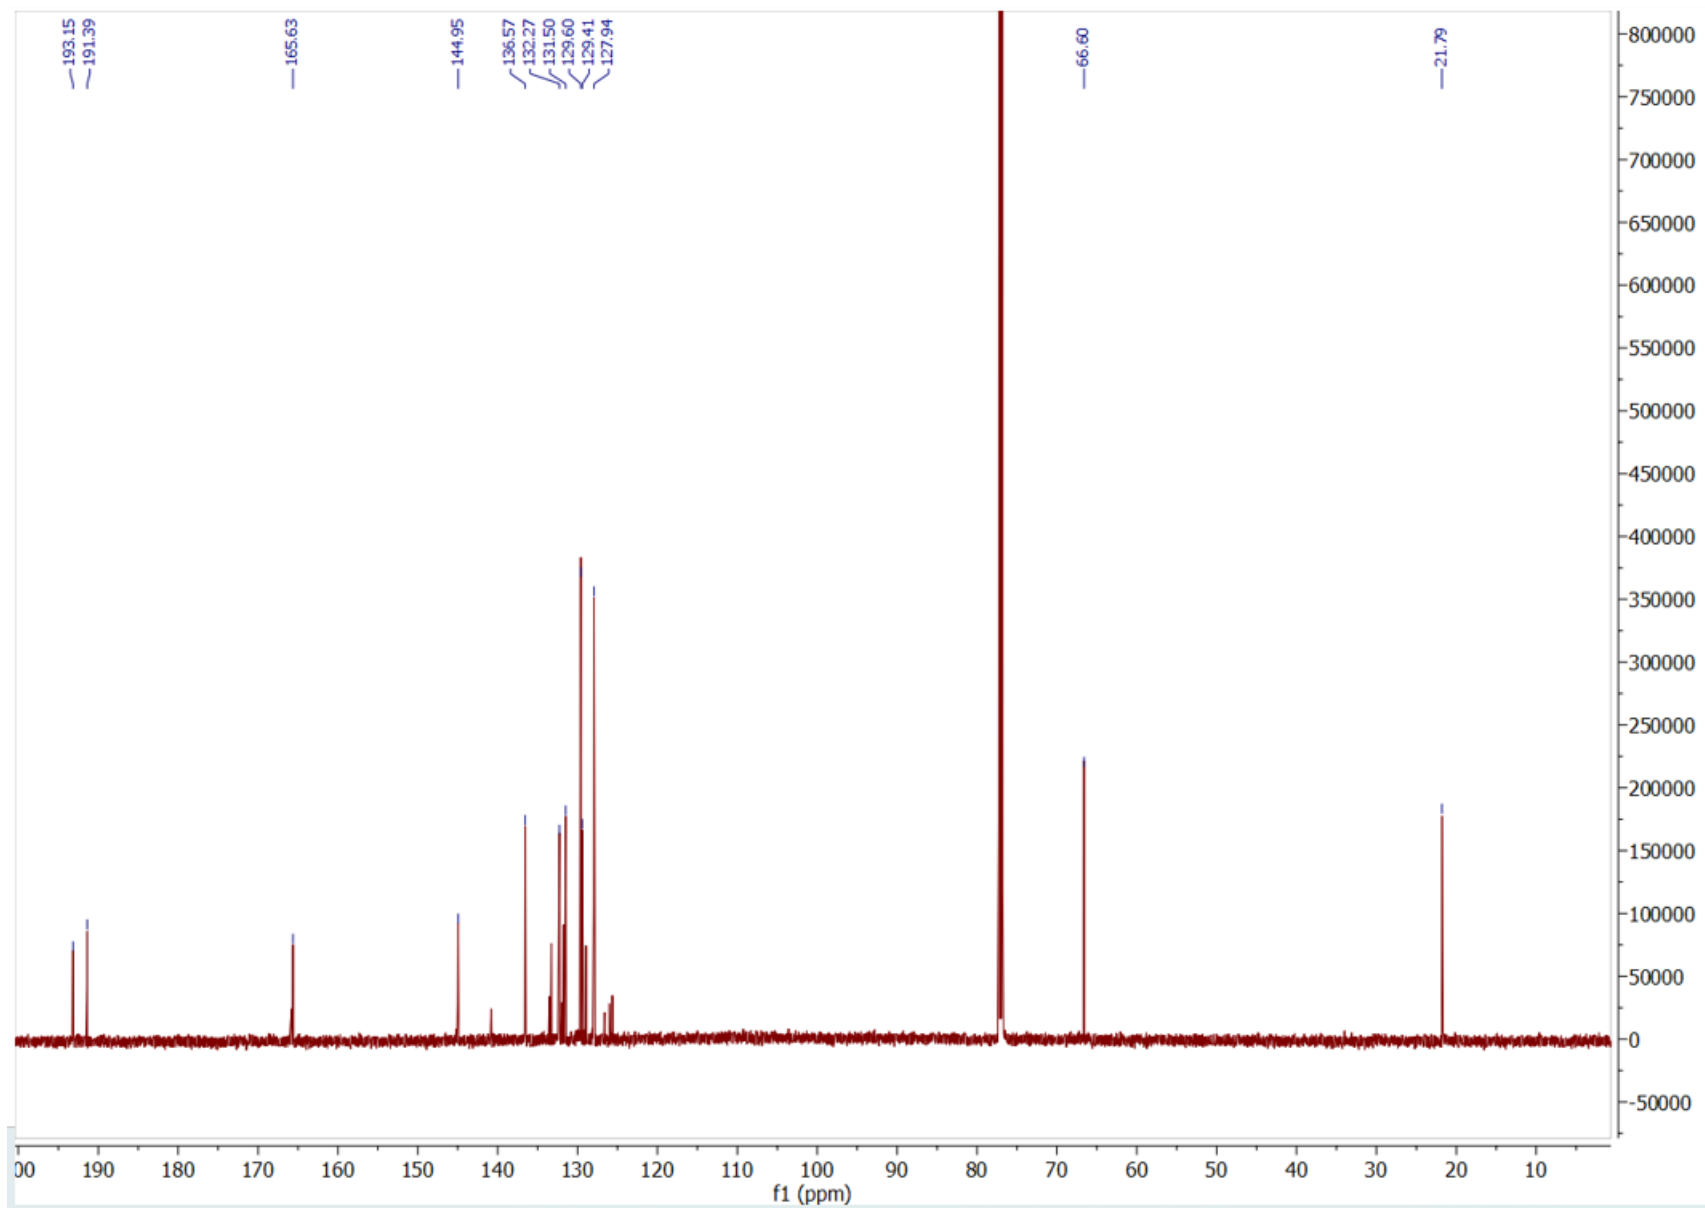

(3-hydroxybenzo[b]thiophen-2-yl)(4-hydroxyphenyl)methanone (5c)

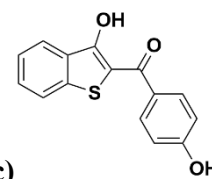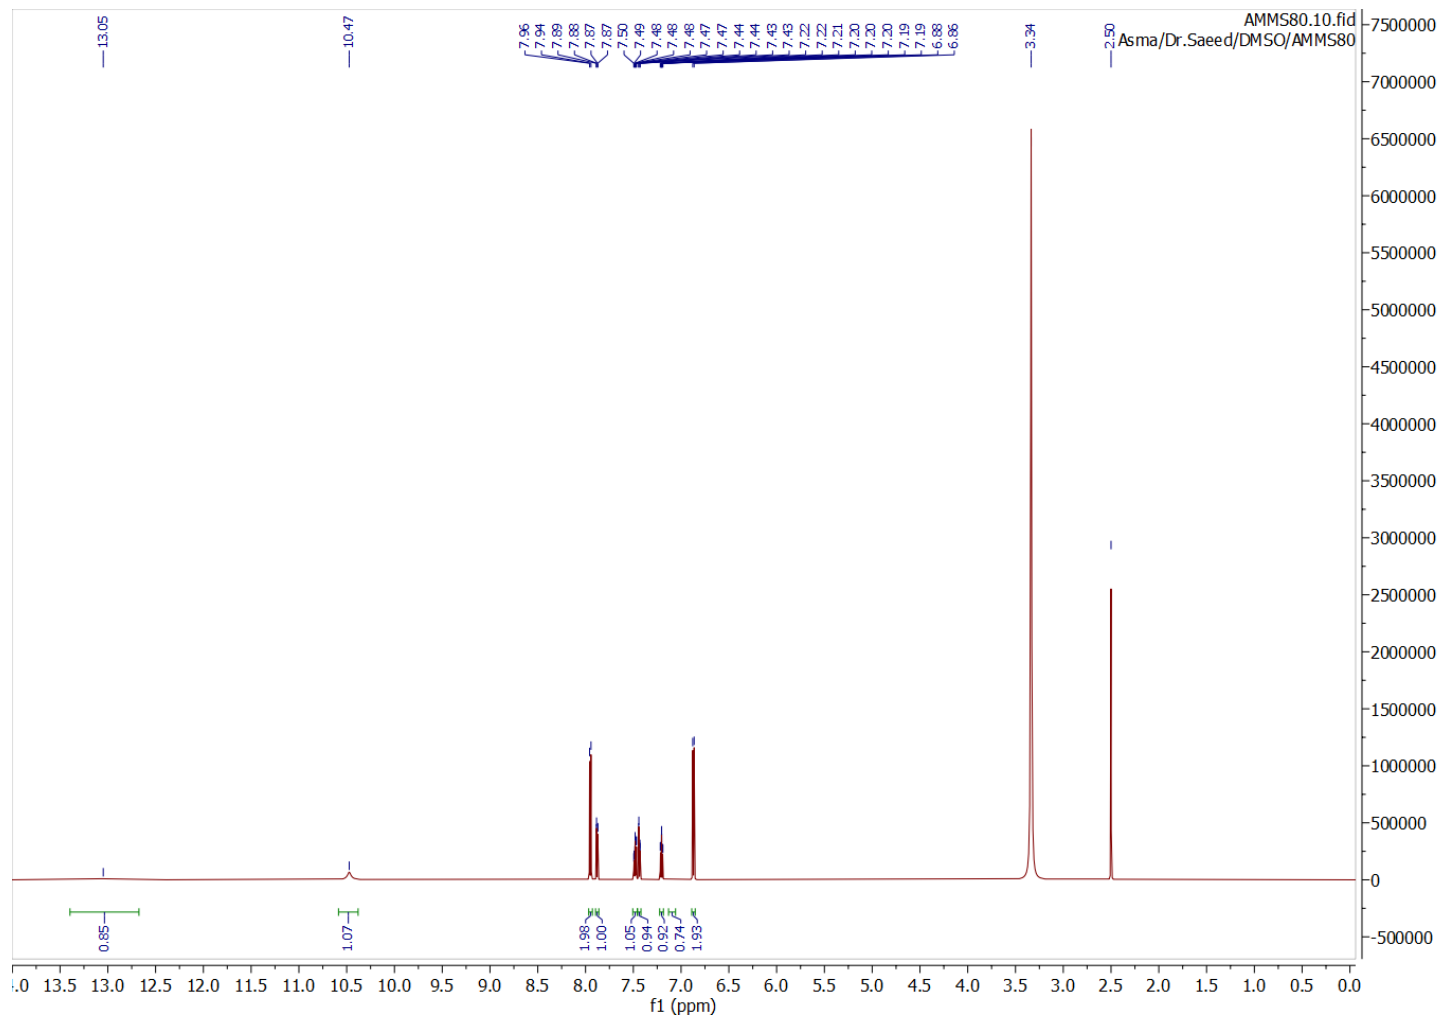



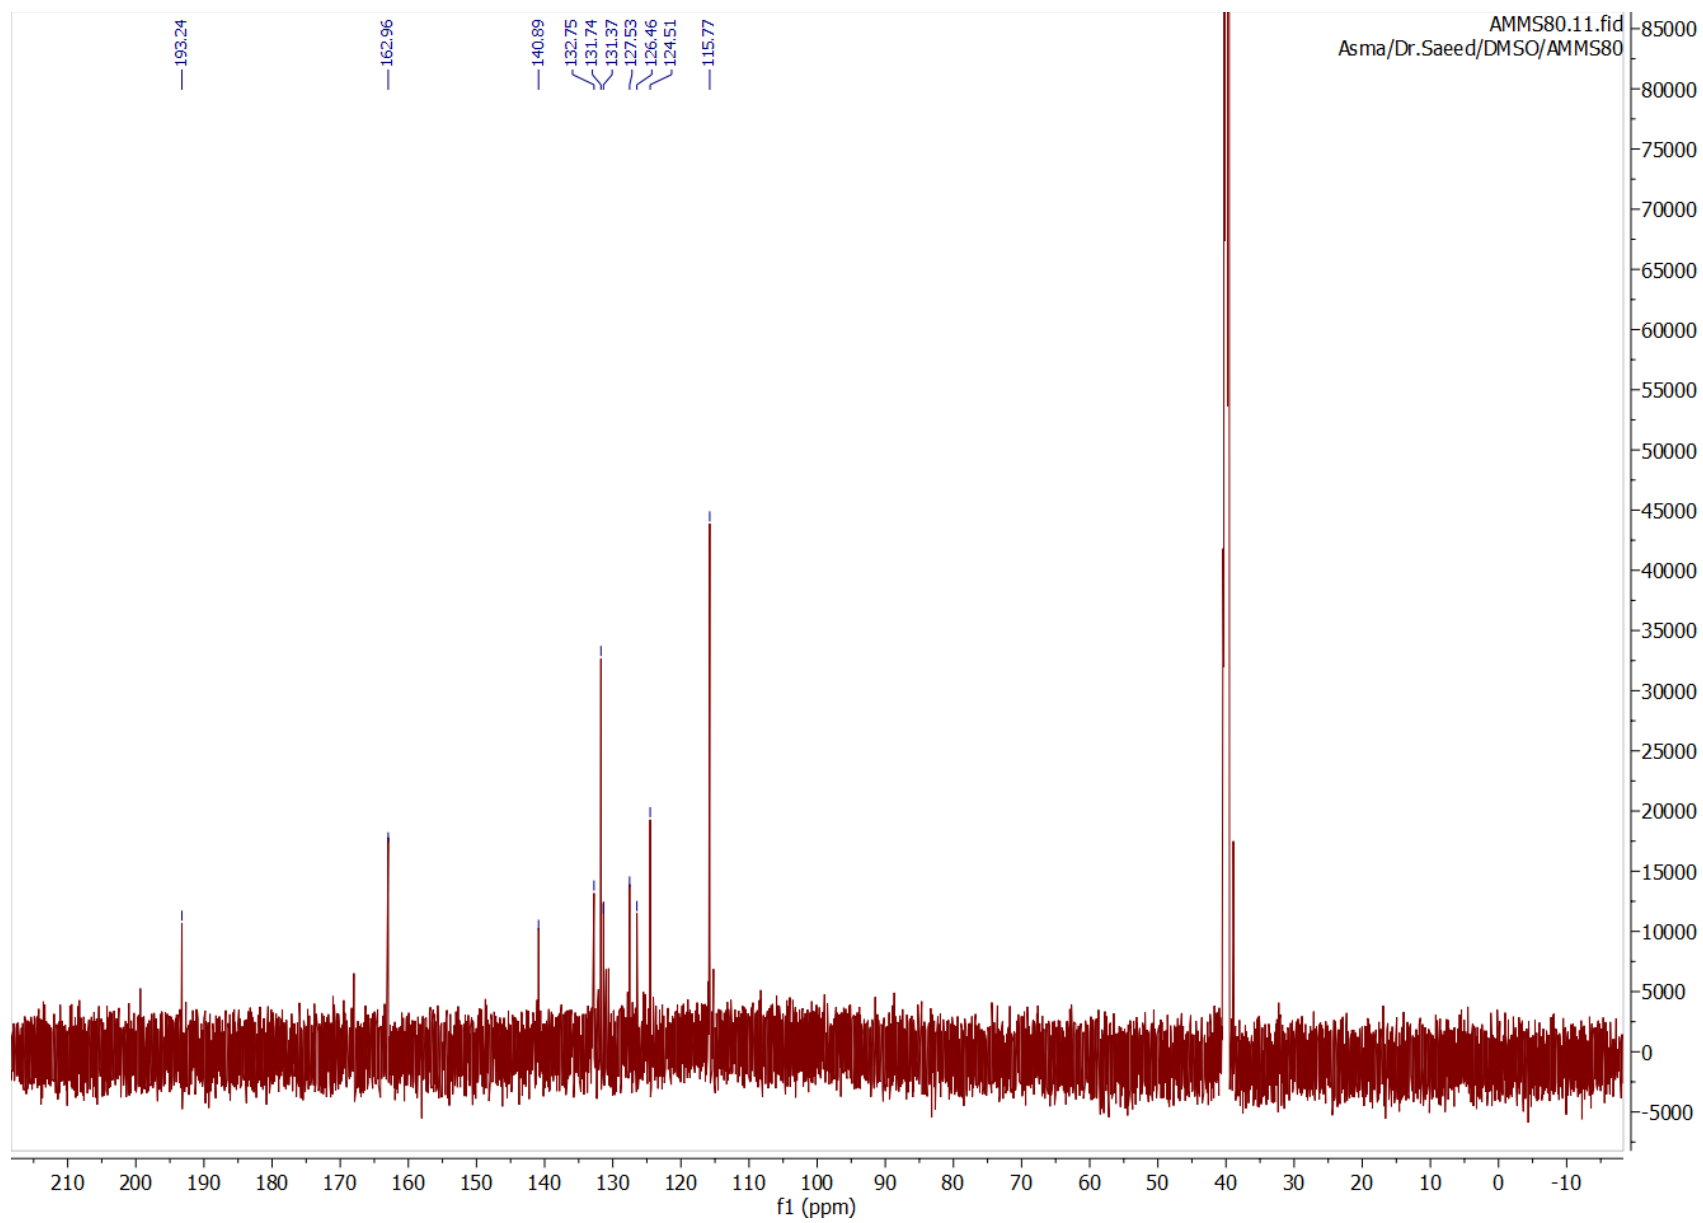

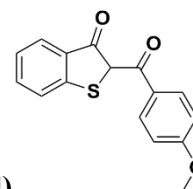

2-(4-methoxybenzoyl)benzo[b]thiophen-3(2H)-one (5d)

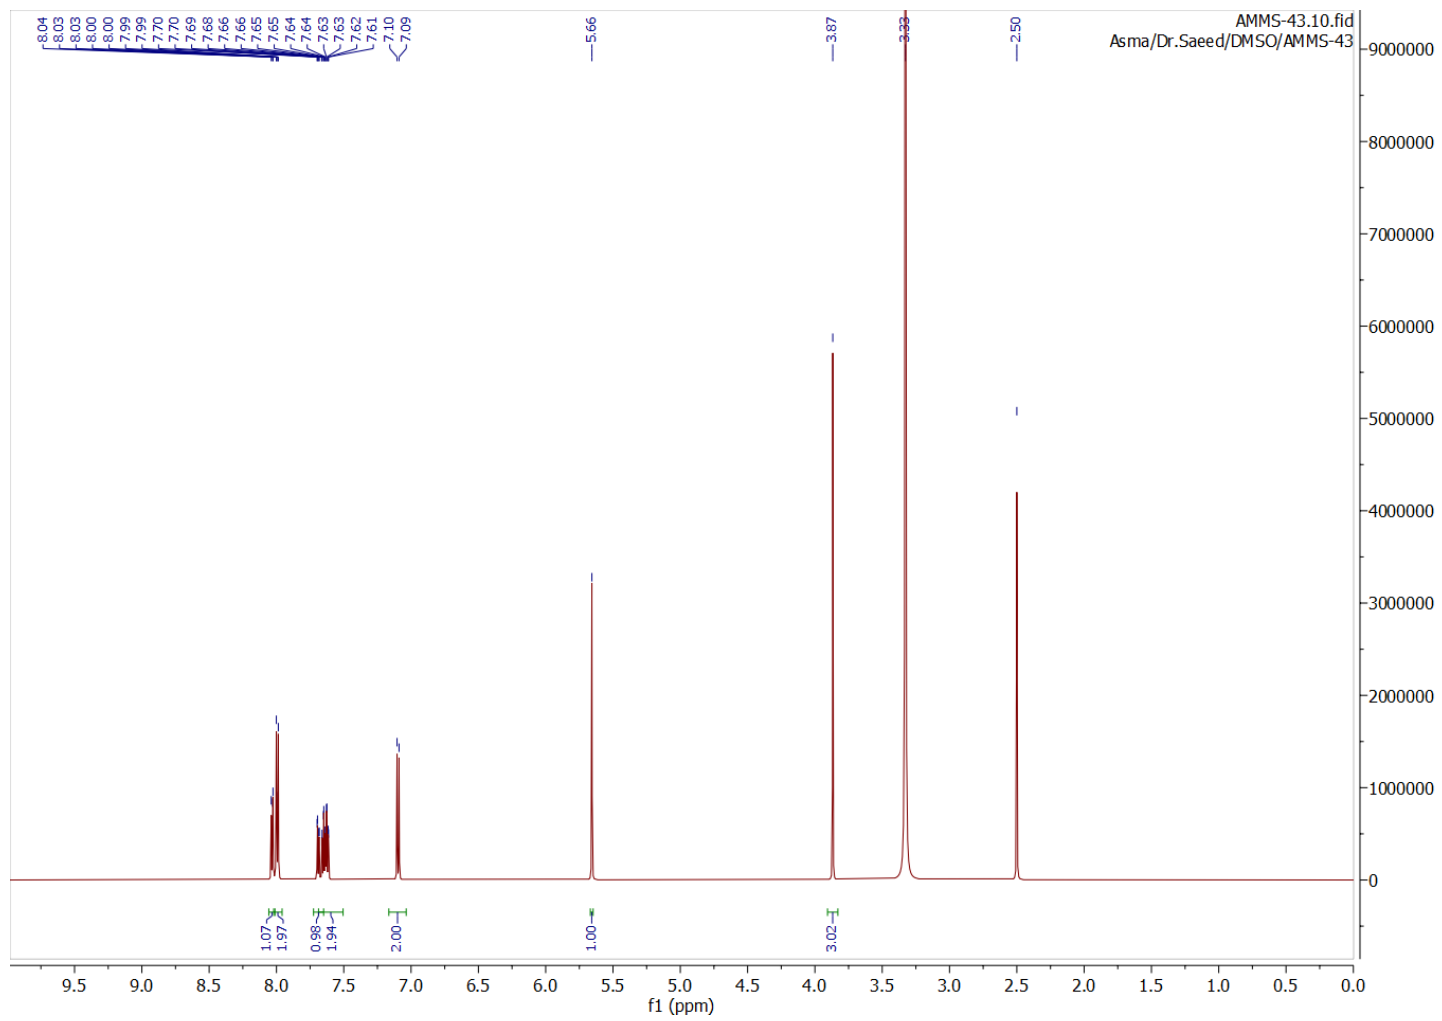

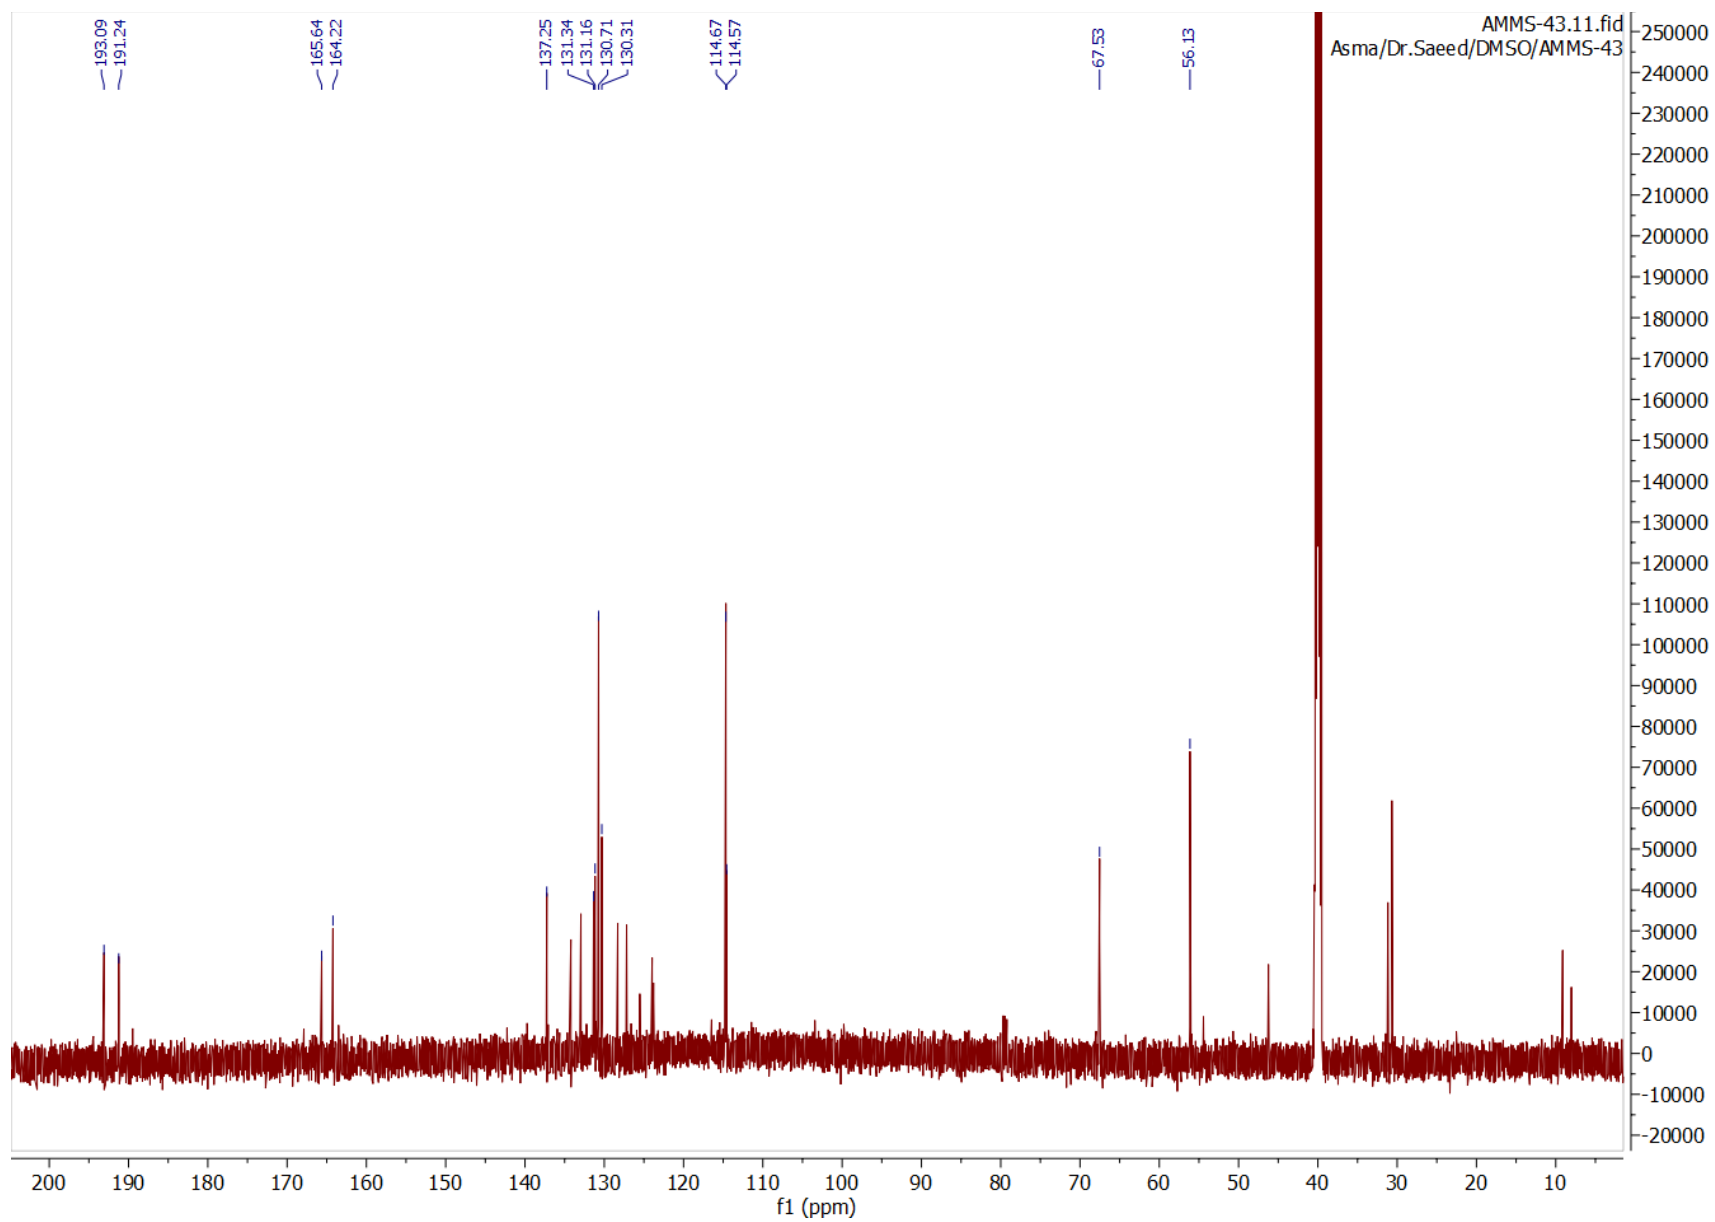

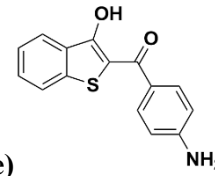

(4-aminophenyl)(3-hydroxybenzo[b]thiophen-2-yl)methanone (5e)

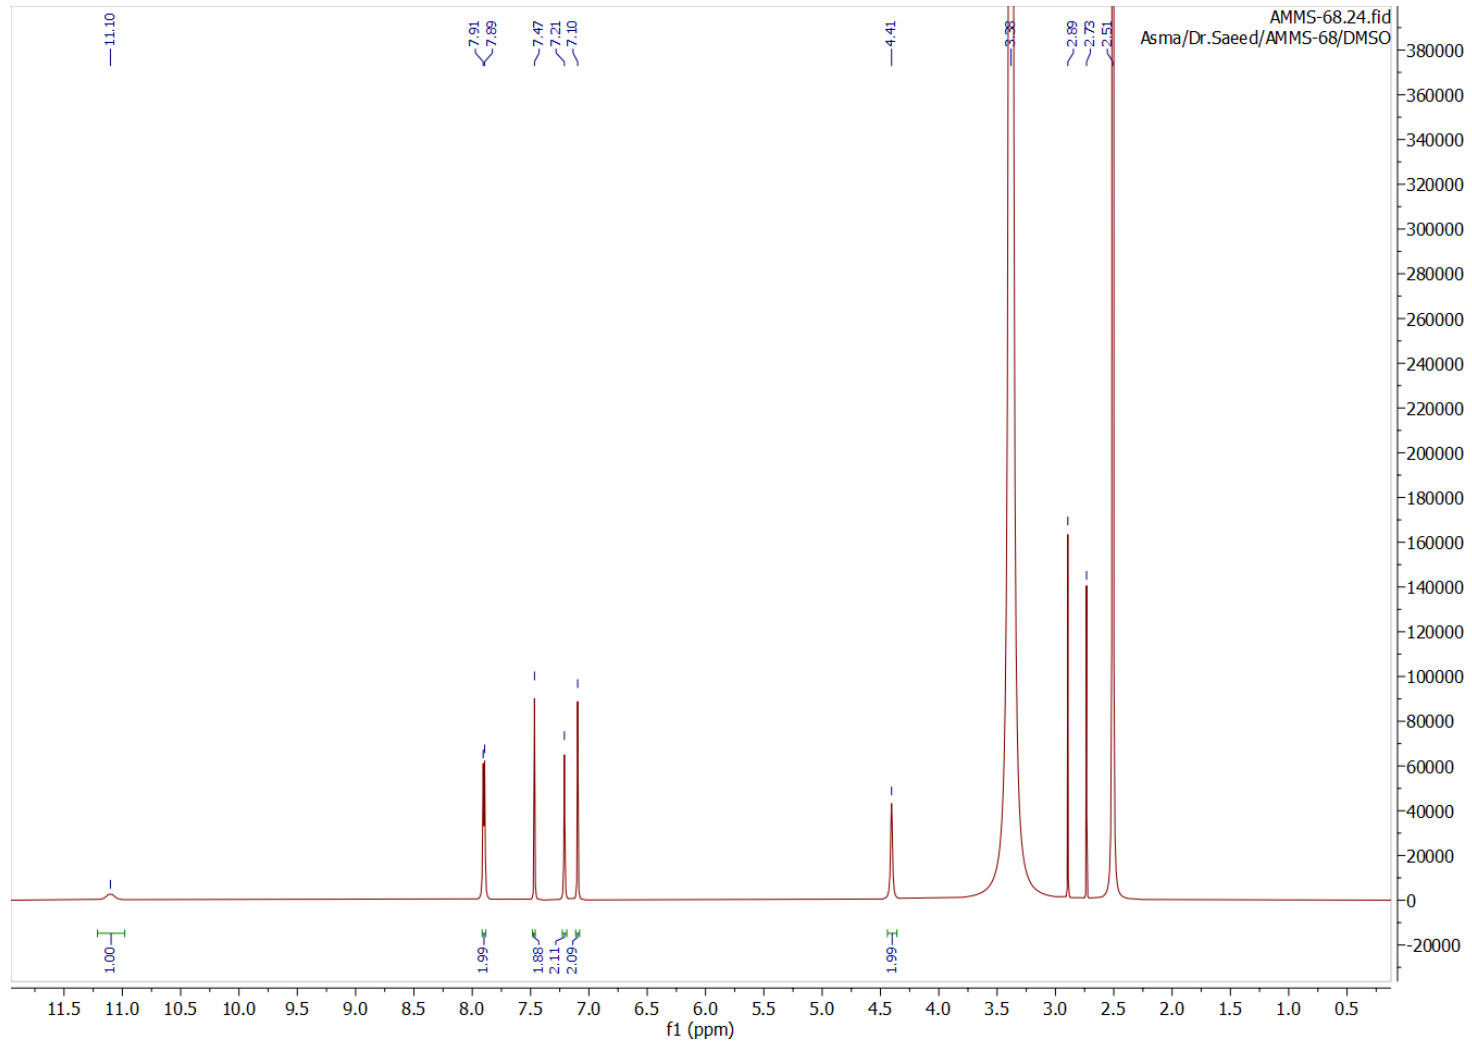

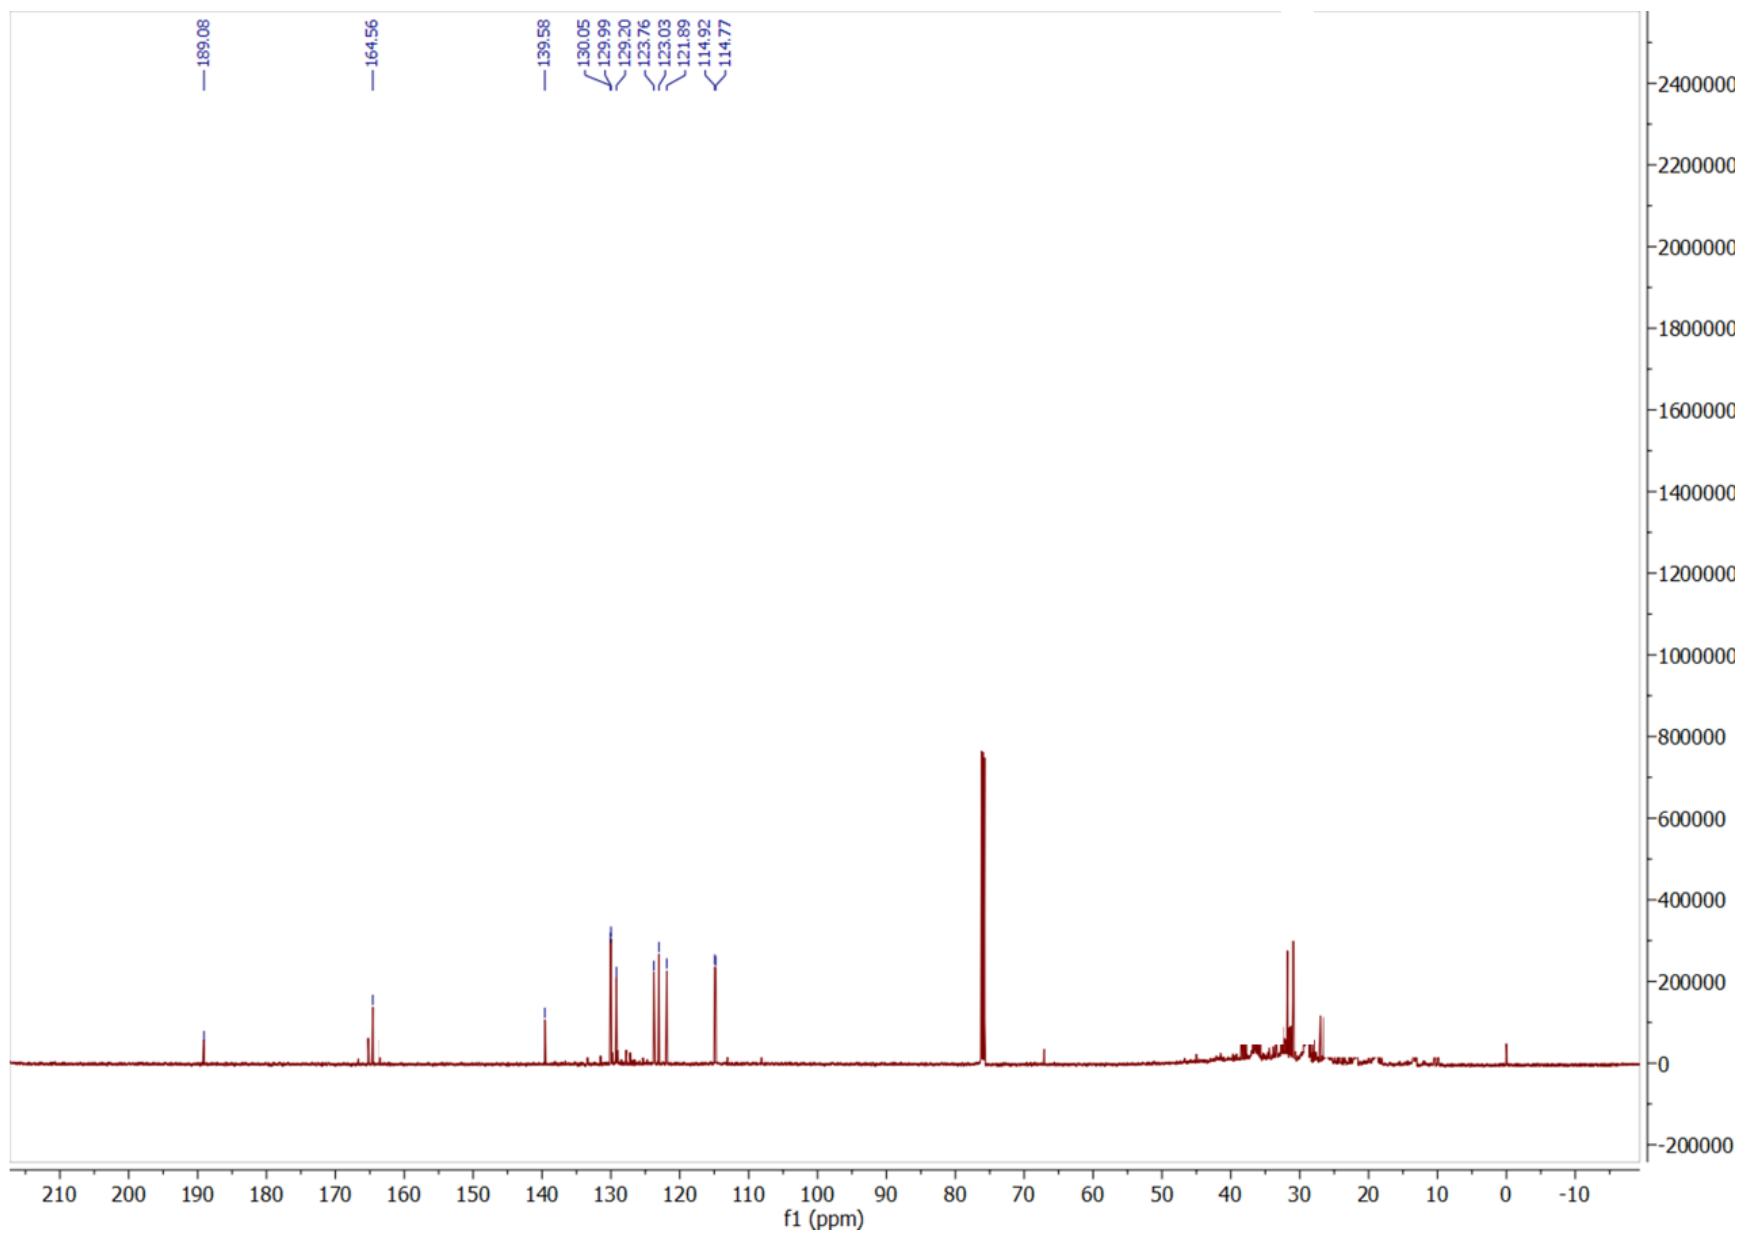

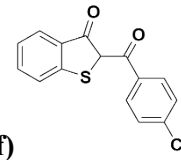

**(4-chlorophenyl)(3-hydroxybenzo[b]thiophen-2-yl)methanone(5f)**

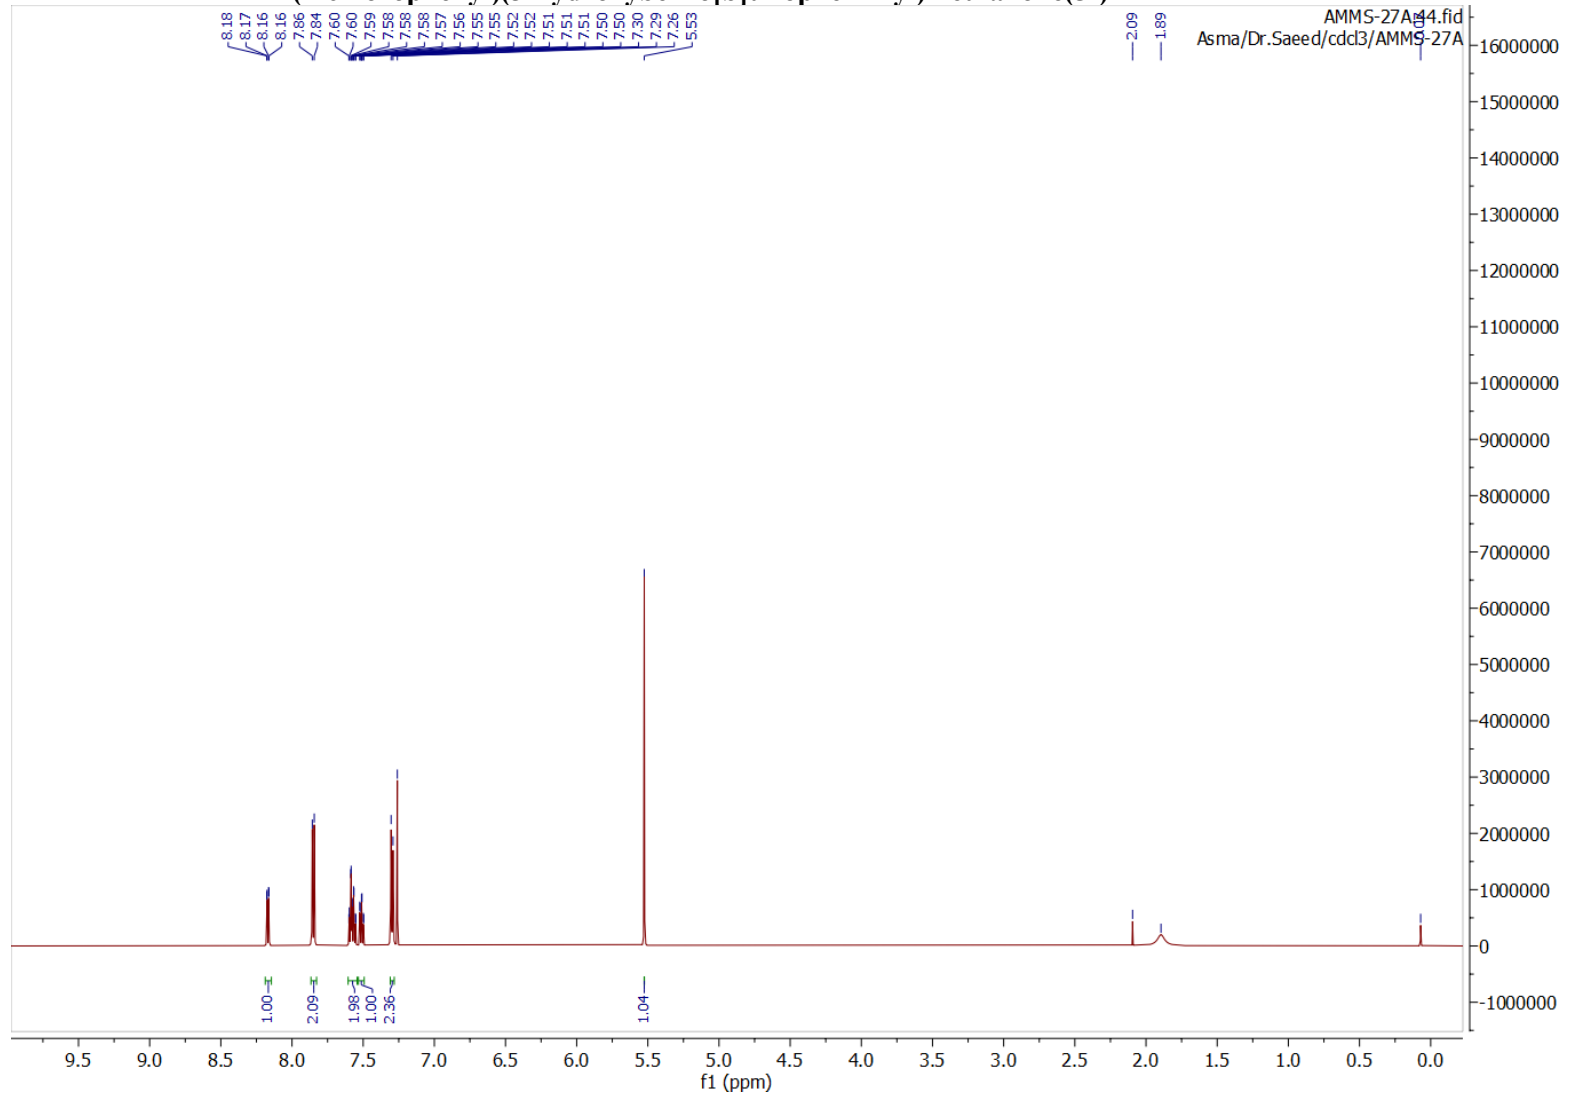

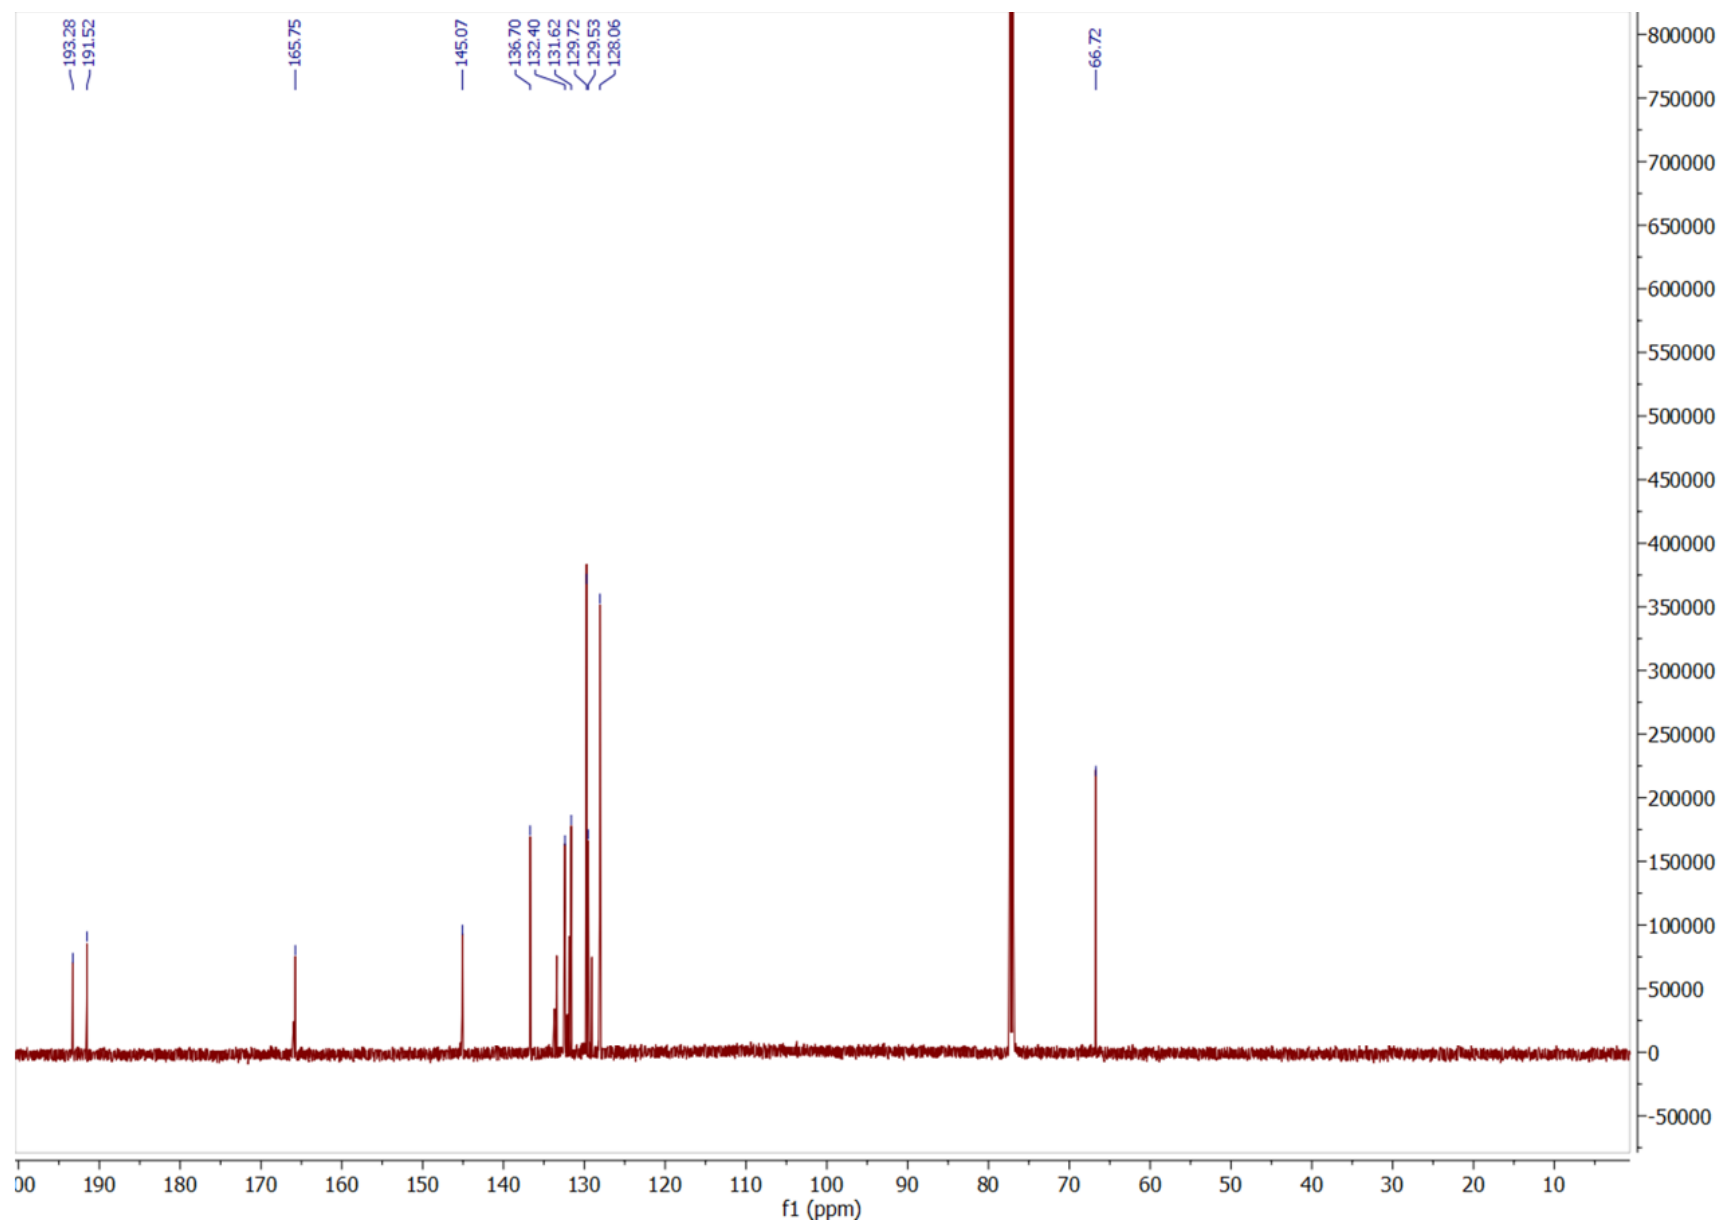

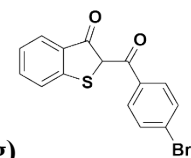

2-(4-bromobenzoyl)benzo[b]thiophen-3(2H)-one (5g)

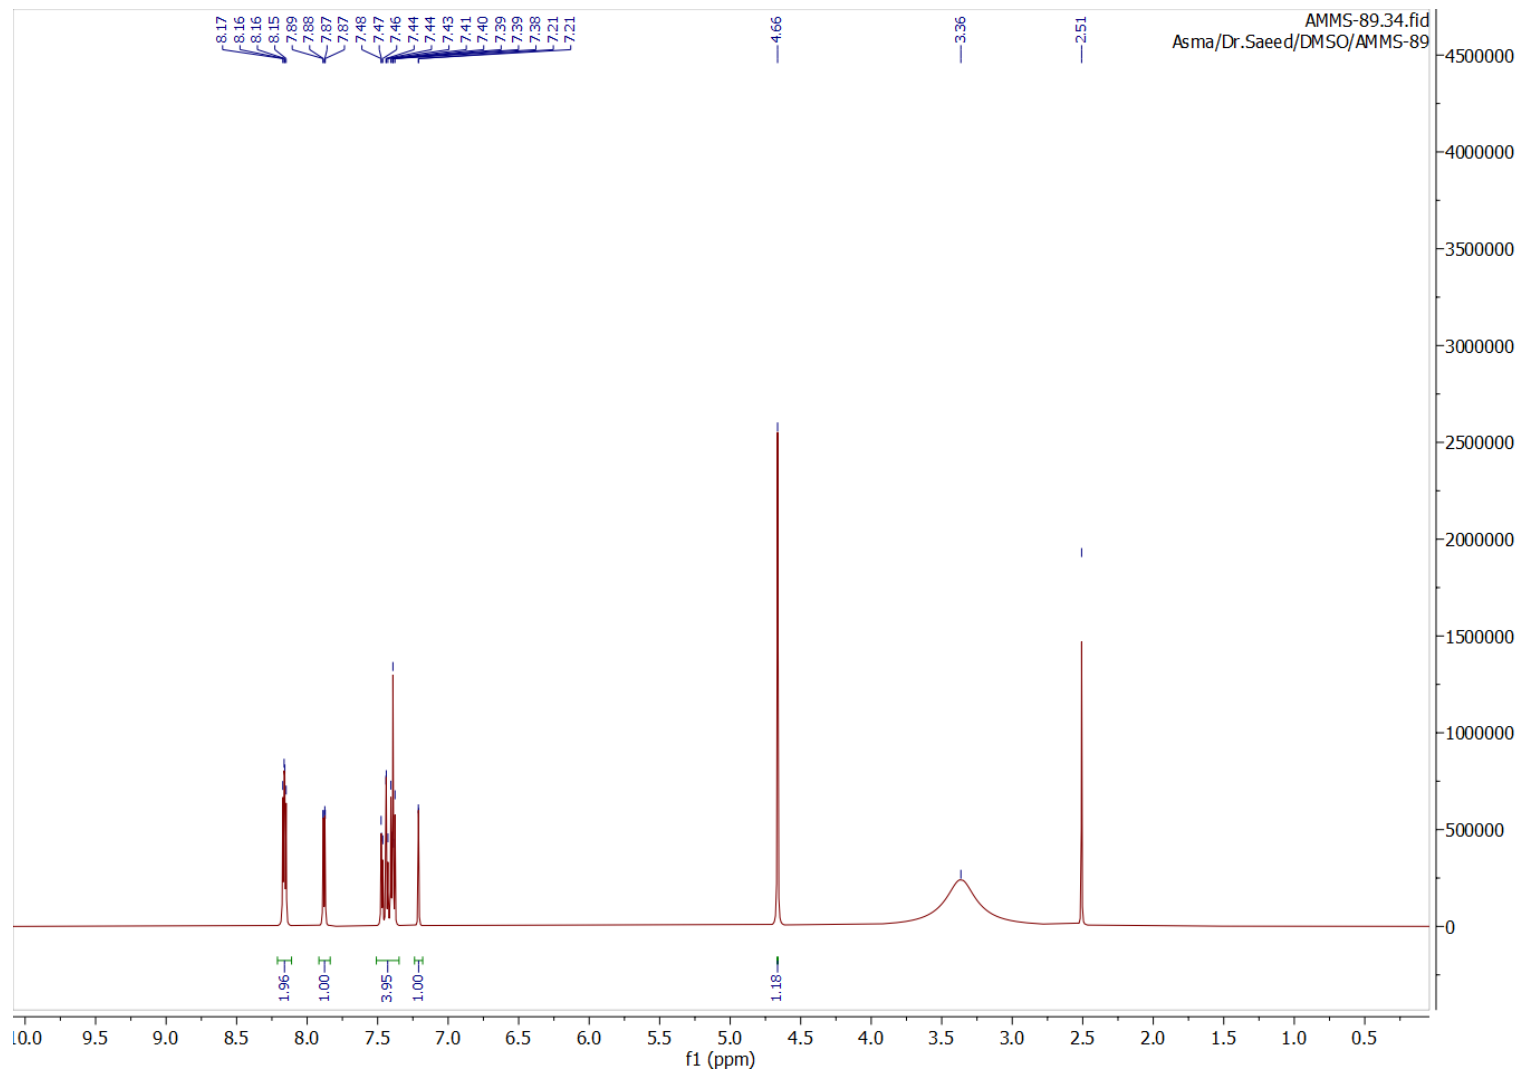



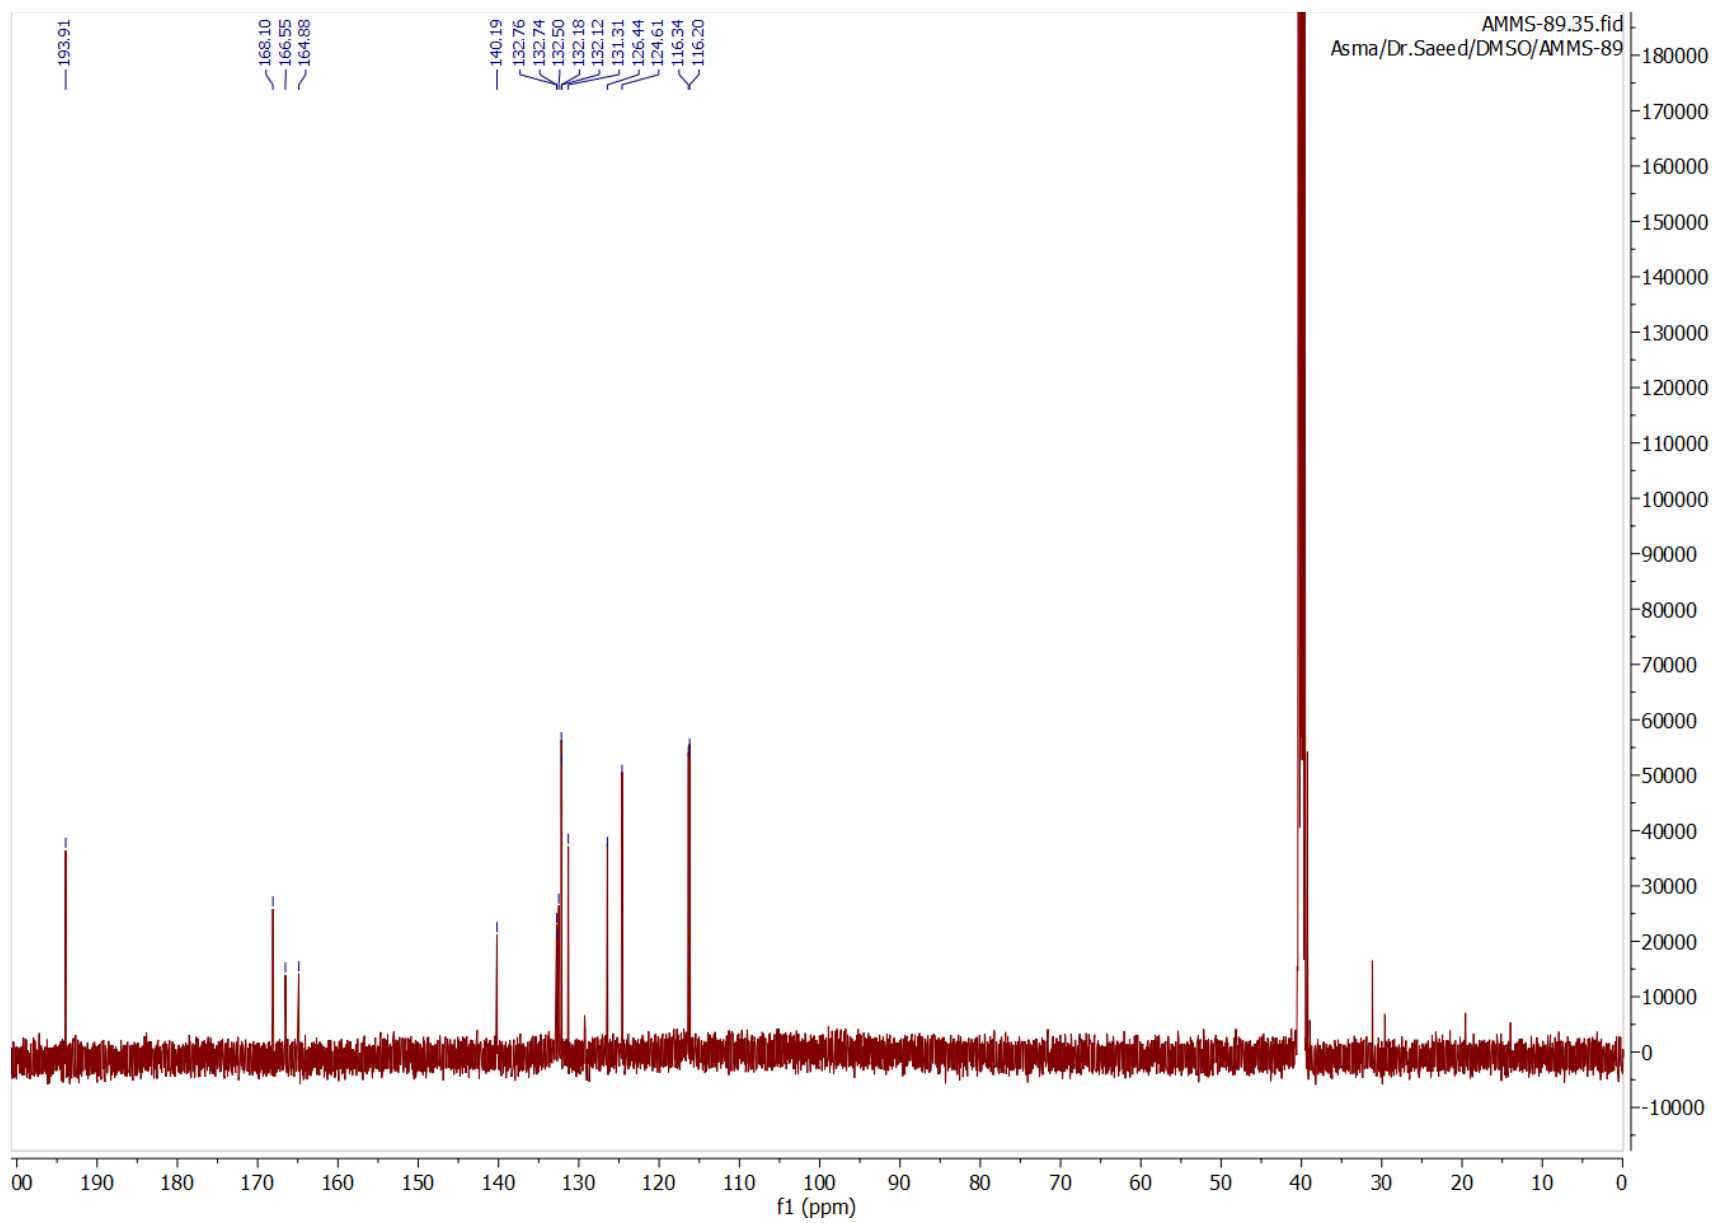

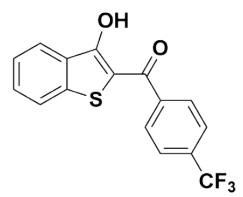

**(3-hydroxybenzo[b]thiophen-2-yl)(4-(trifluoromethyl)phenyl)methanone (5h)**

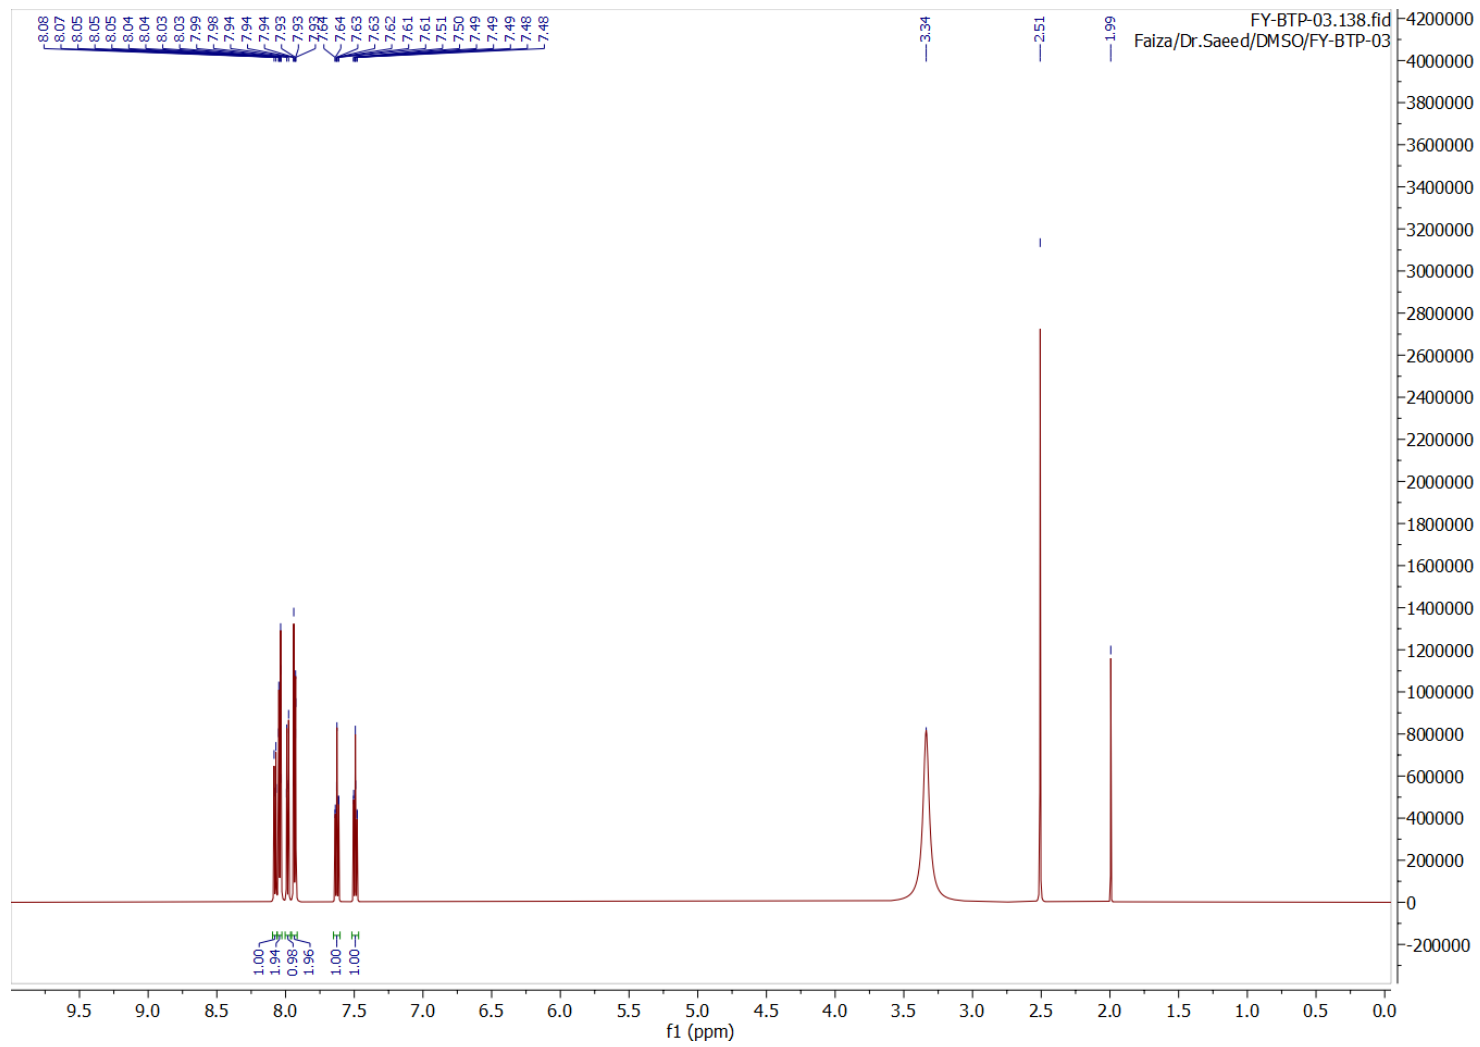

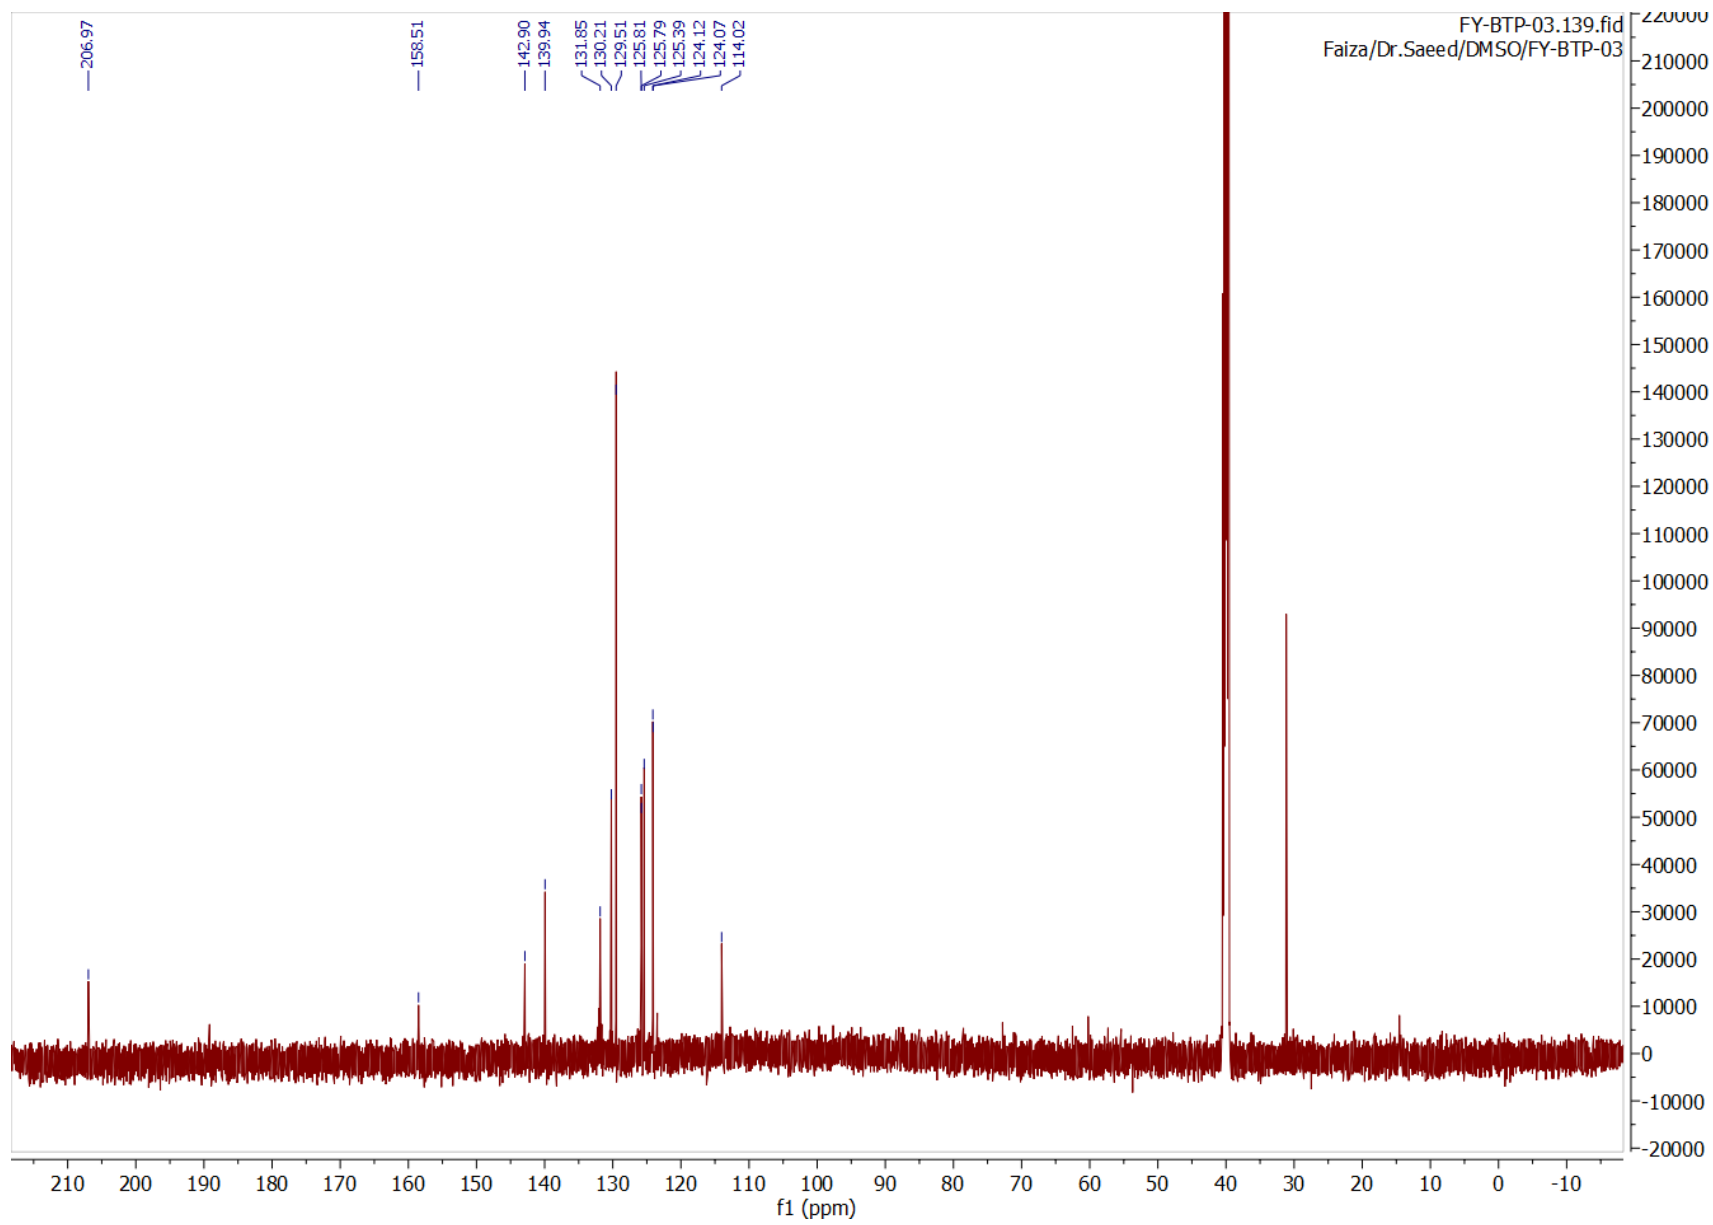

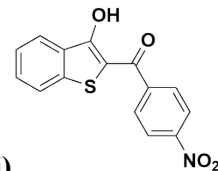

(3-hydroxybenzo[b]thiophen-2-yl)(4-nitrophenyl)methanone (5i)

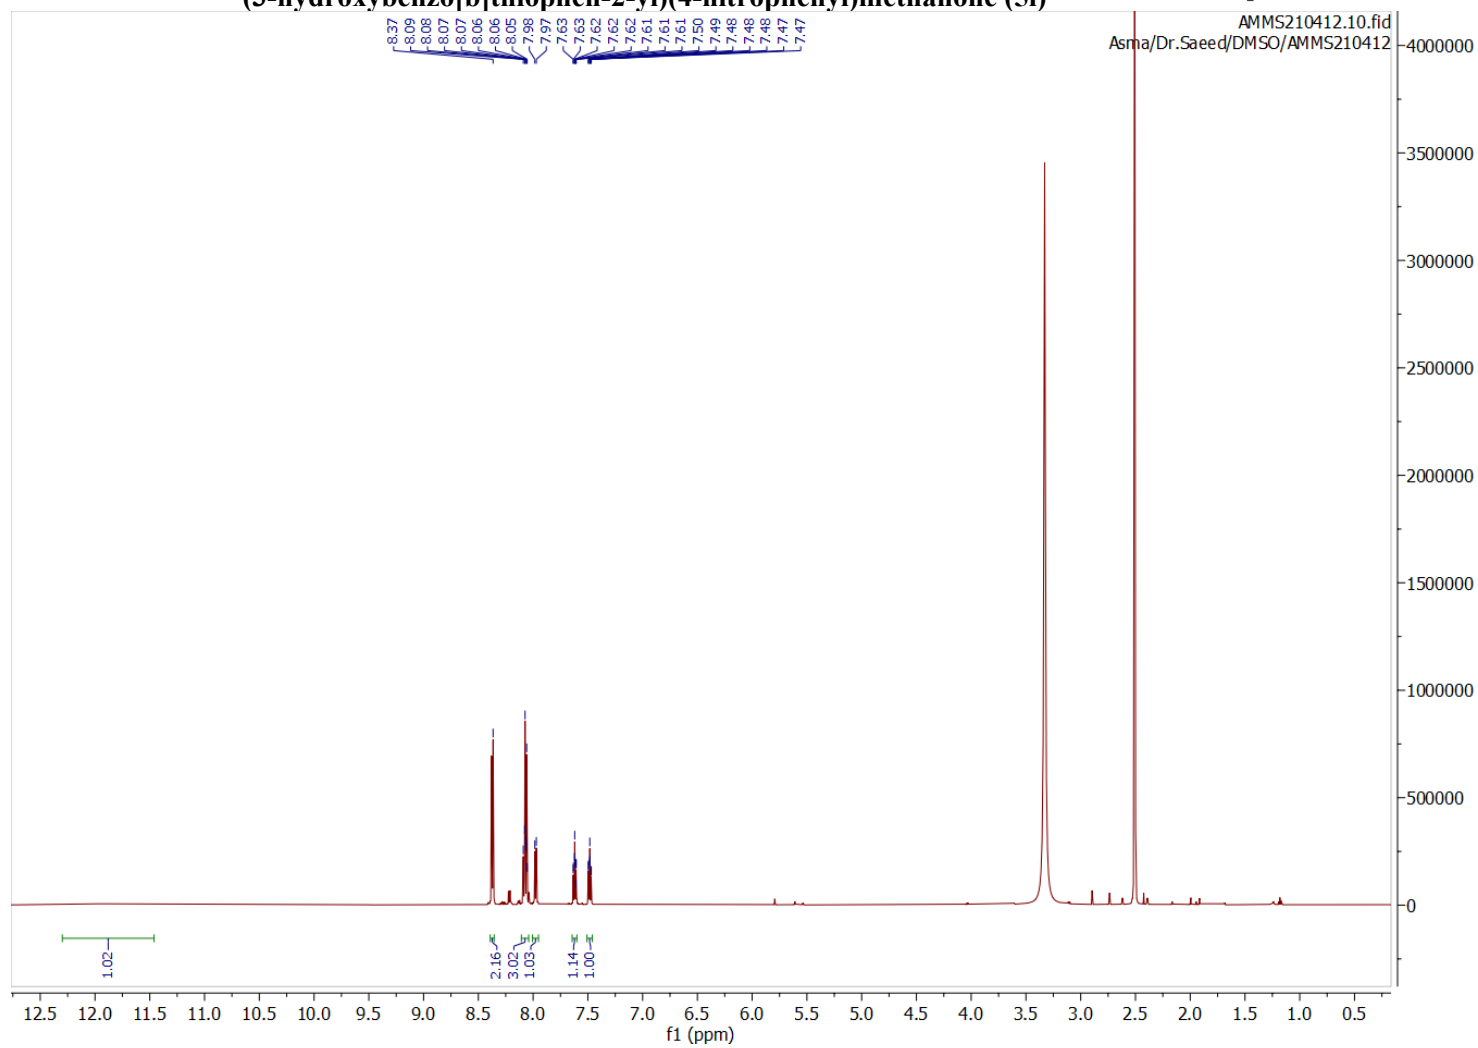

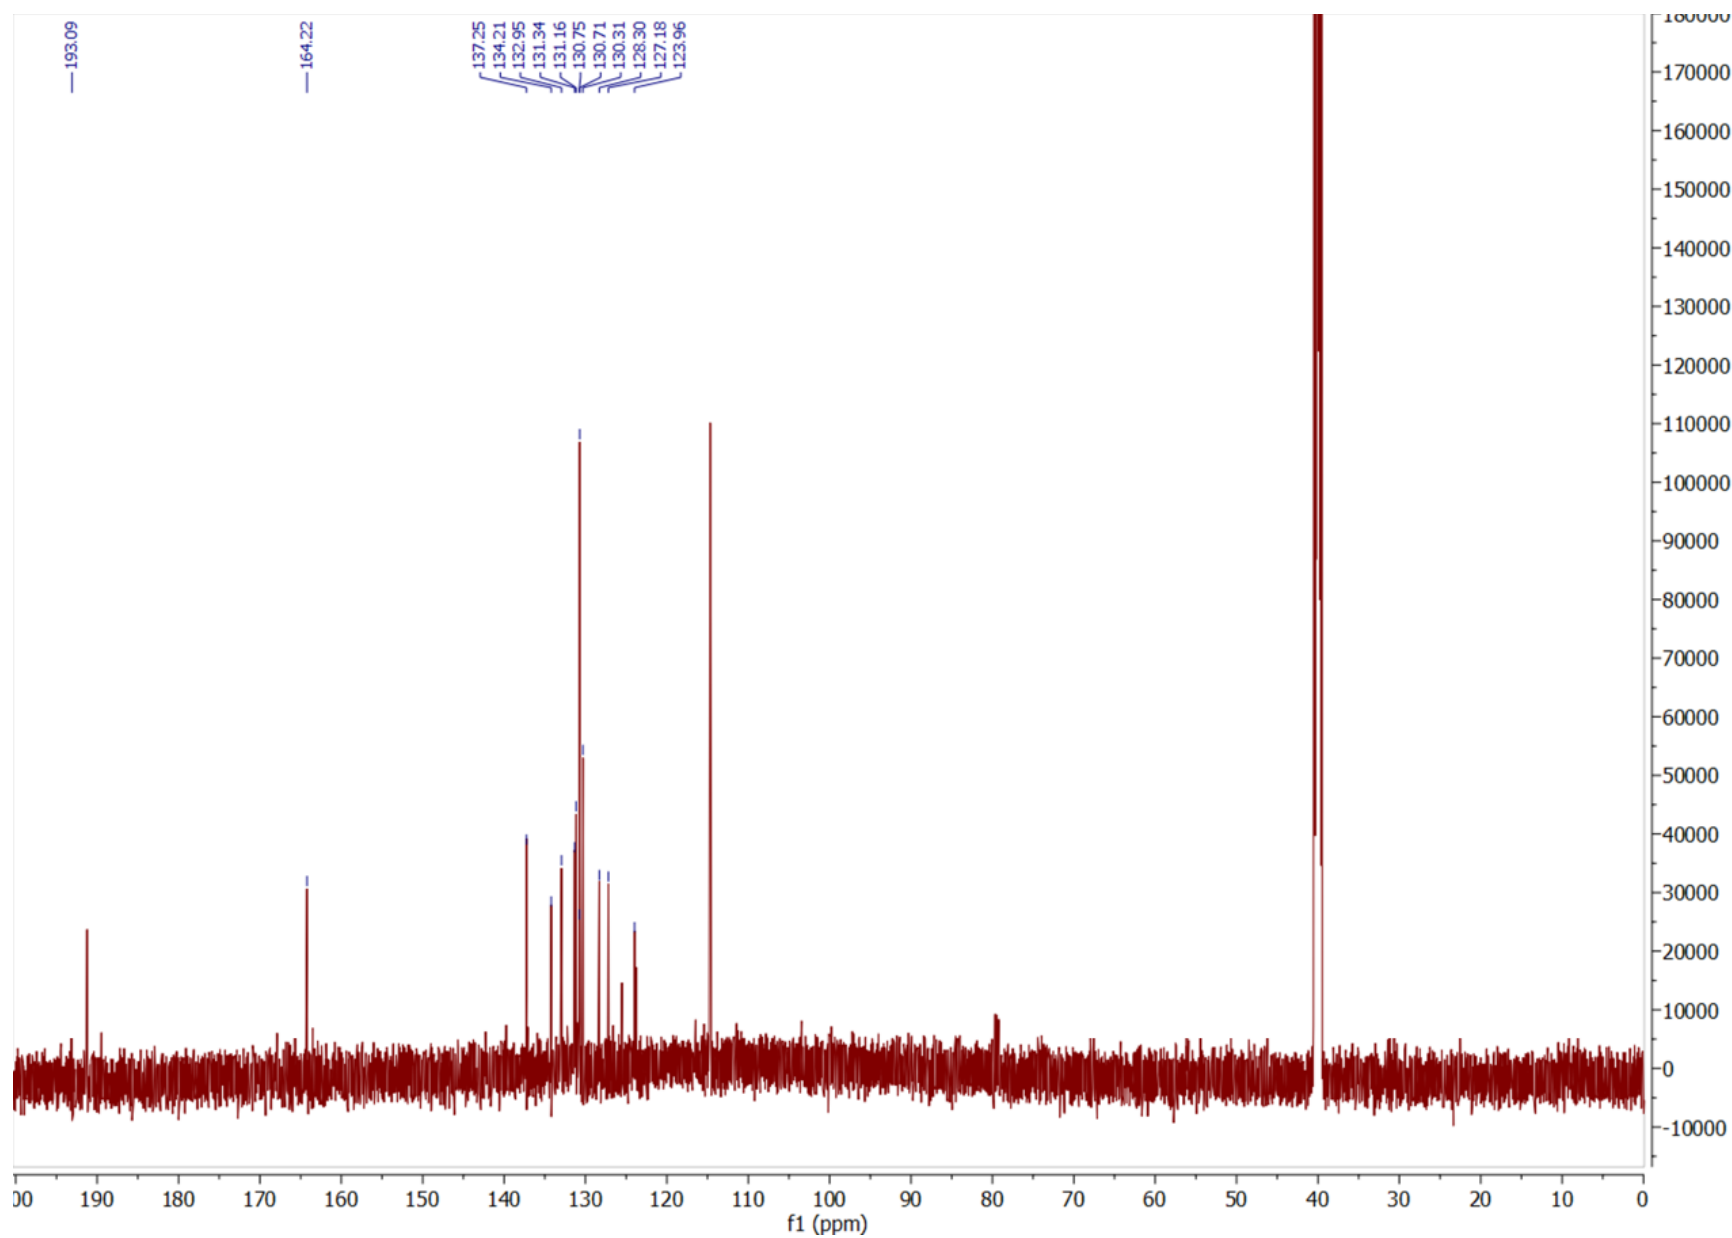

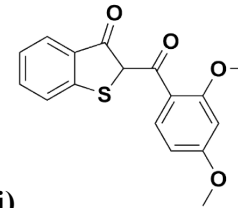

2-(2,4-dimethoxybenzoyl)benzo[b]thiophen-3(2H)-one (5j)

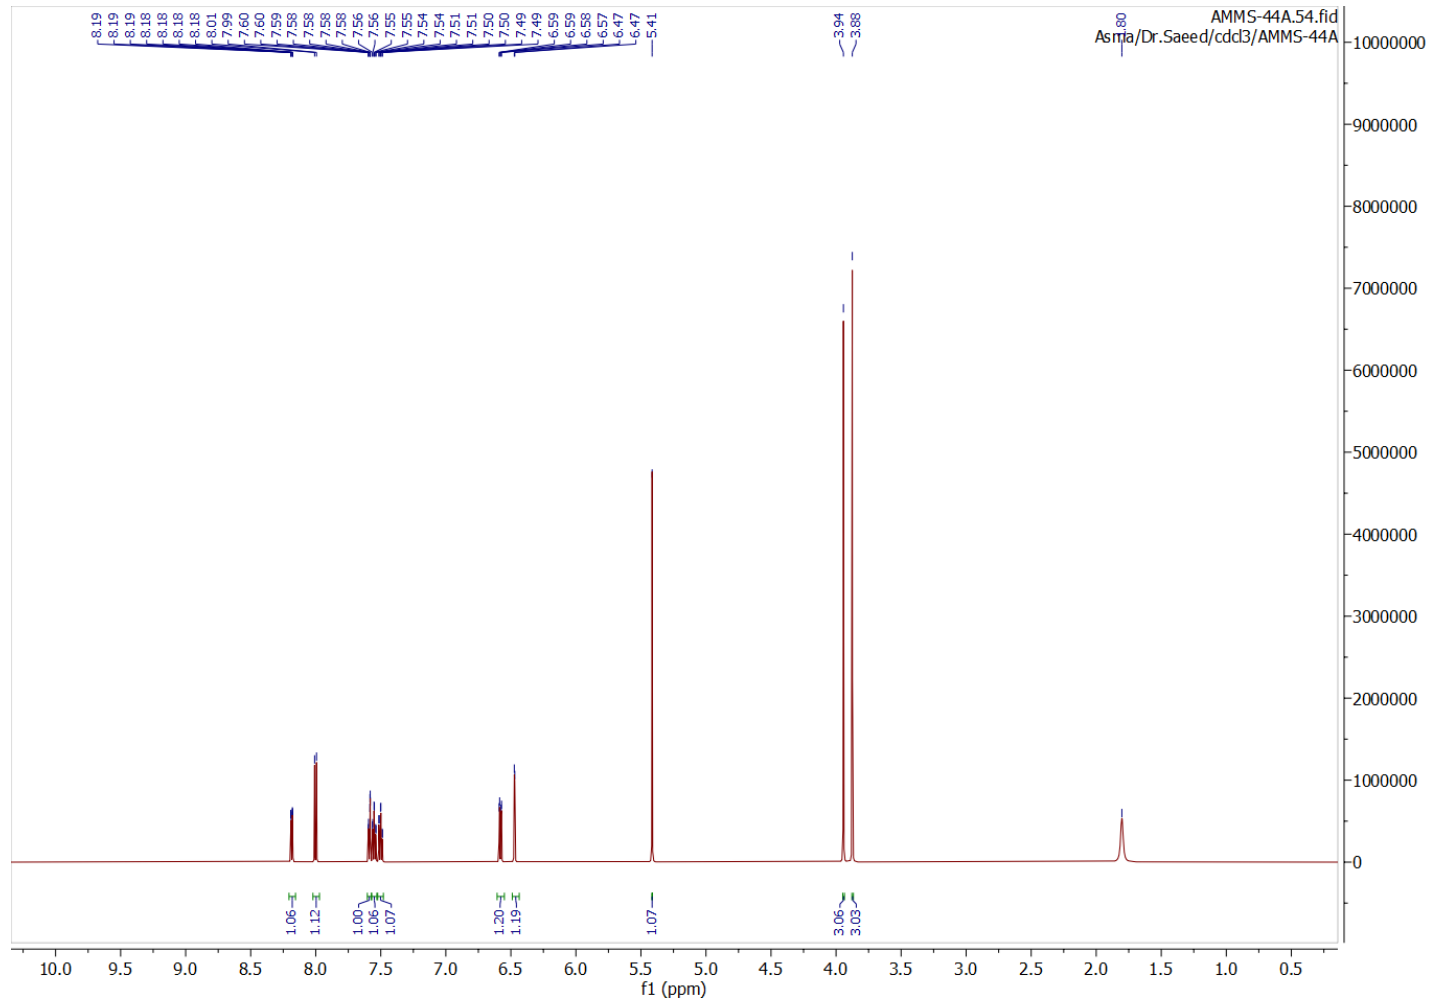

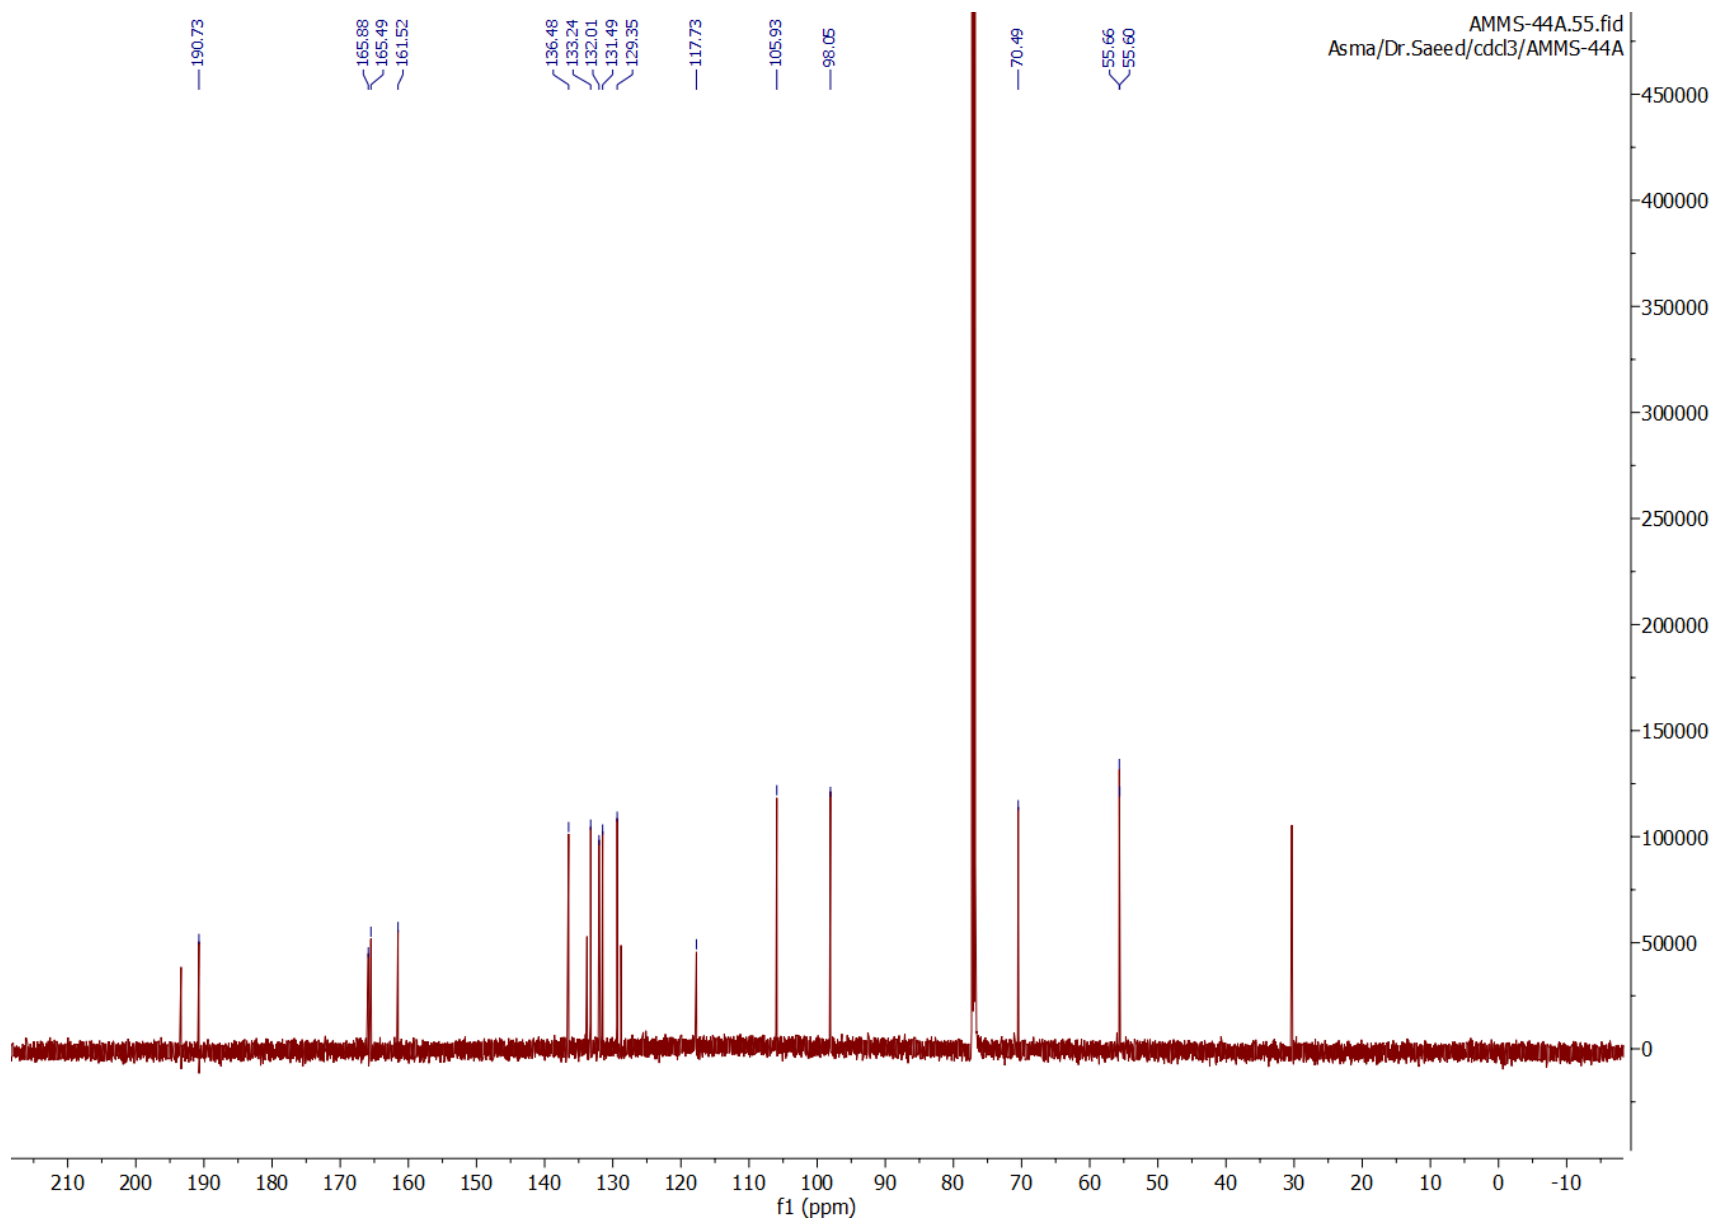

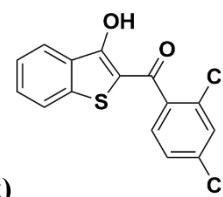

(2,4-dichlorophenyl)(3-hydroxybenzo[b]thiophen-2-yl)methanone (5k)

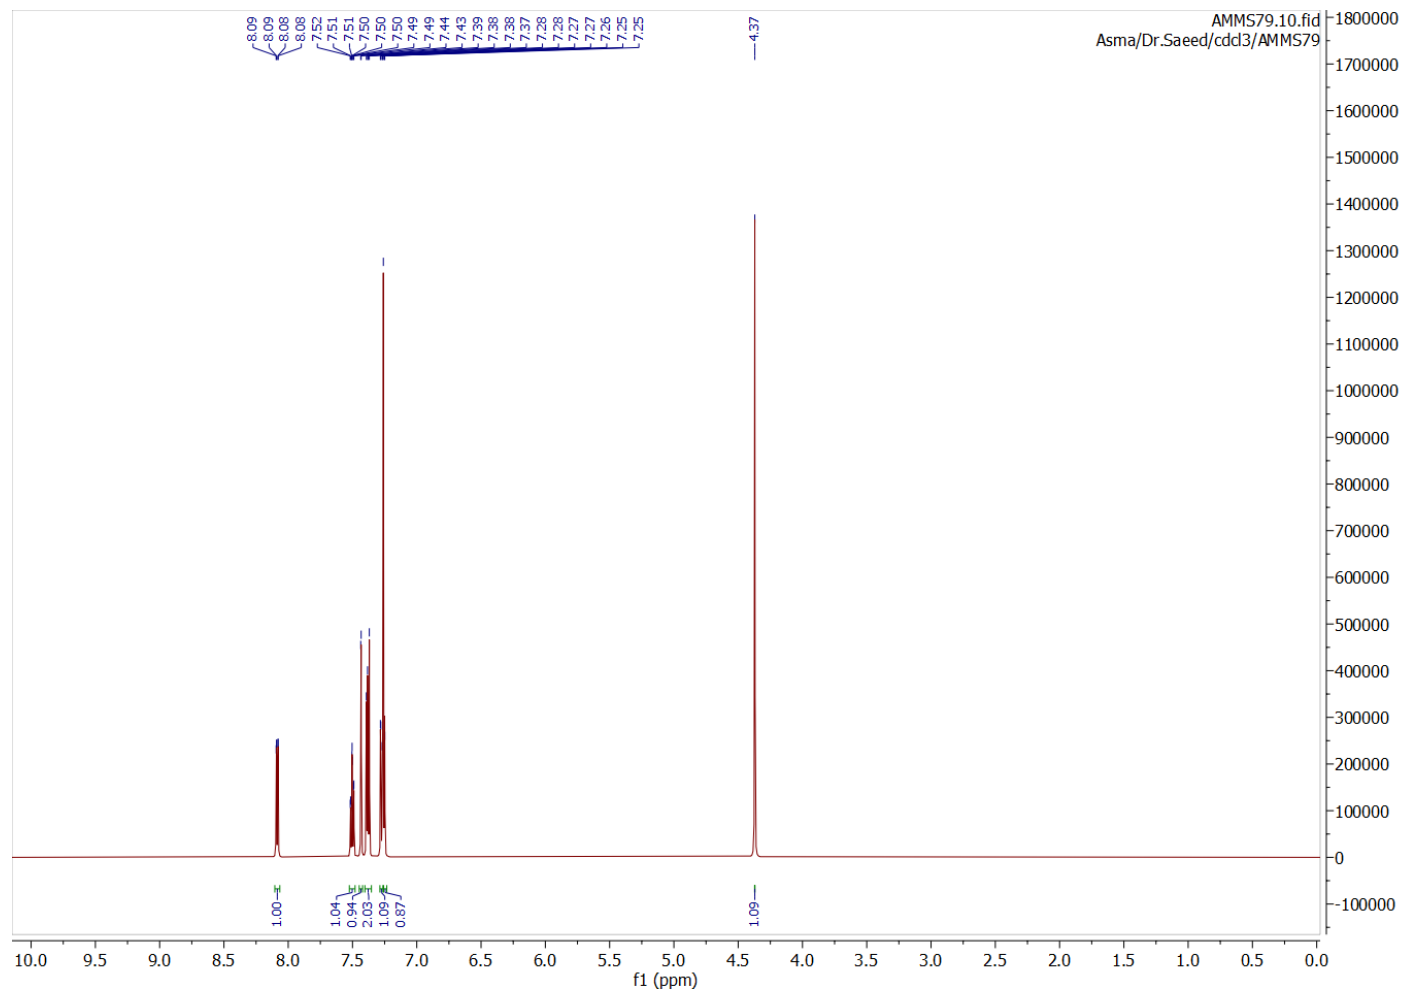



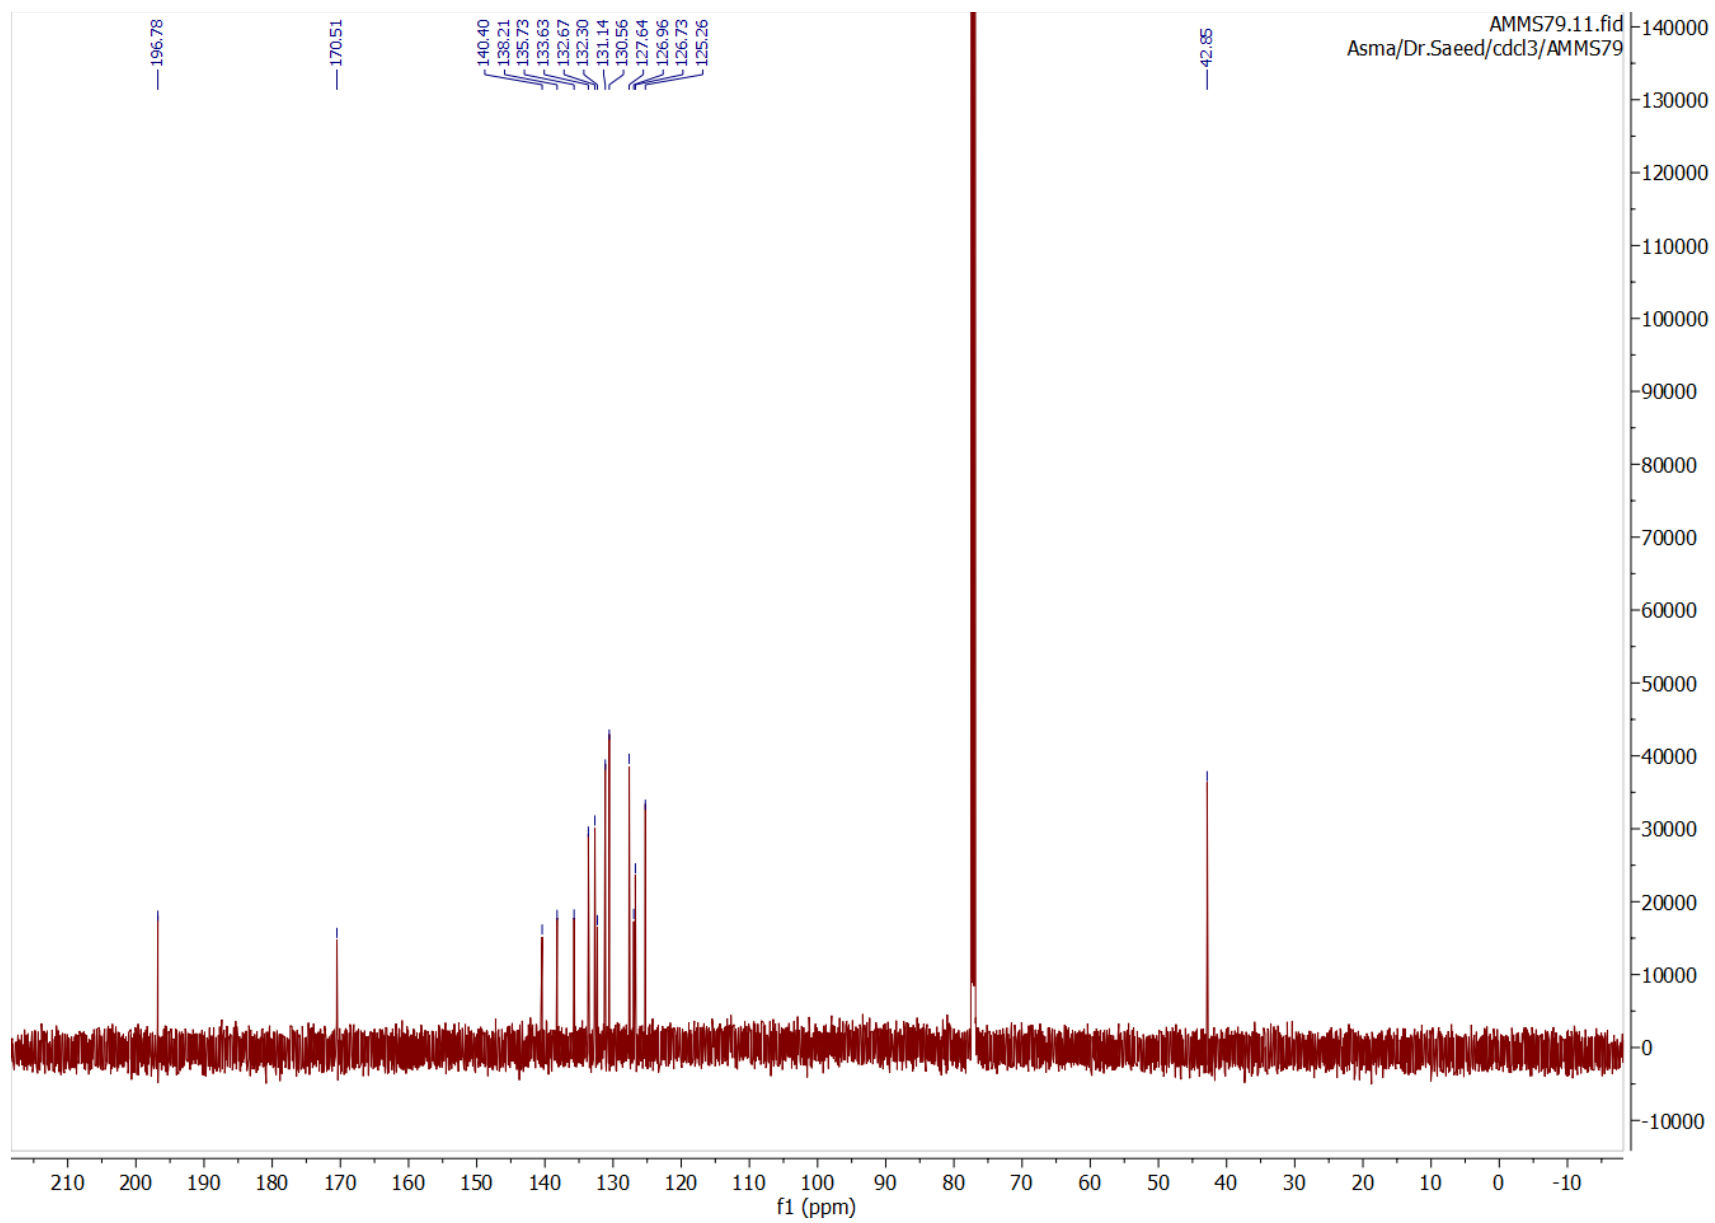

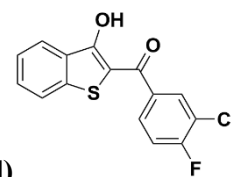

**(3-chloro-4-fluorophenyl)(3-hydroxybenzo[b]thiophen-2-yl)methanone (5I)**

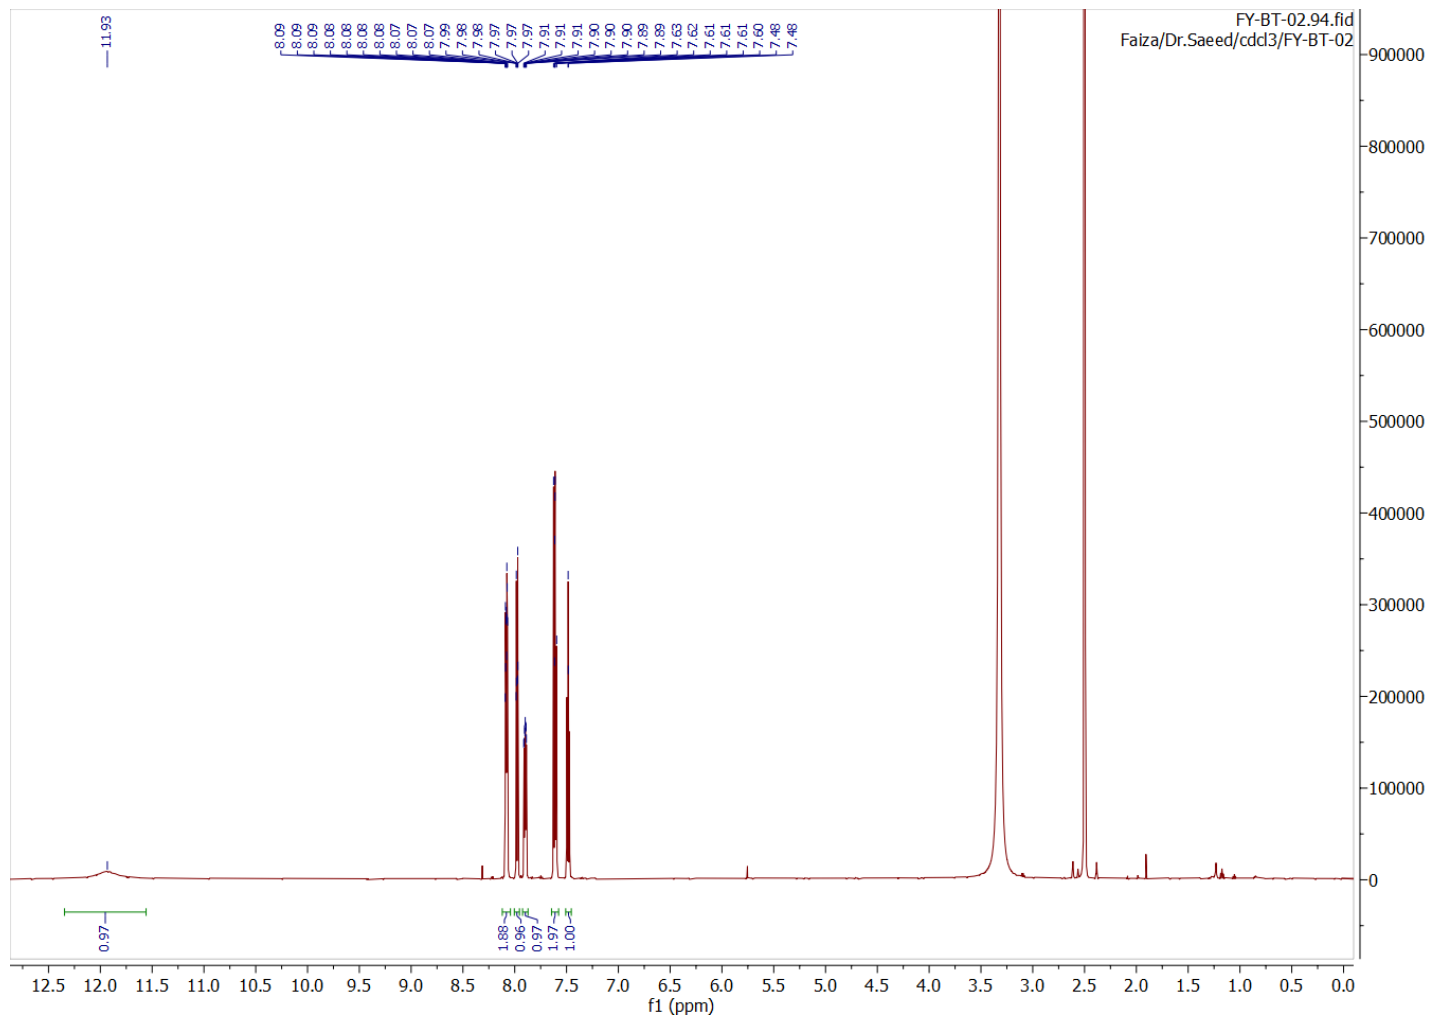

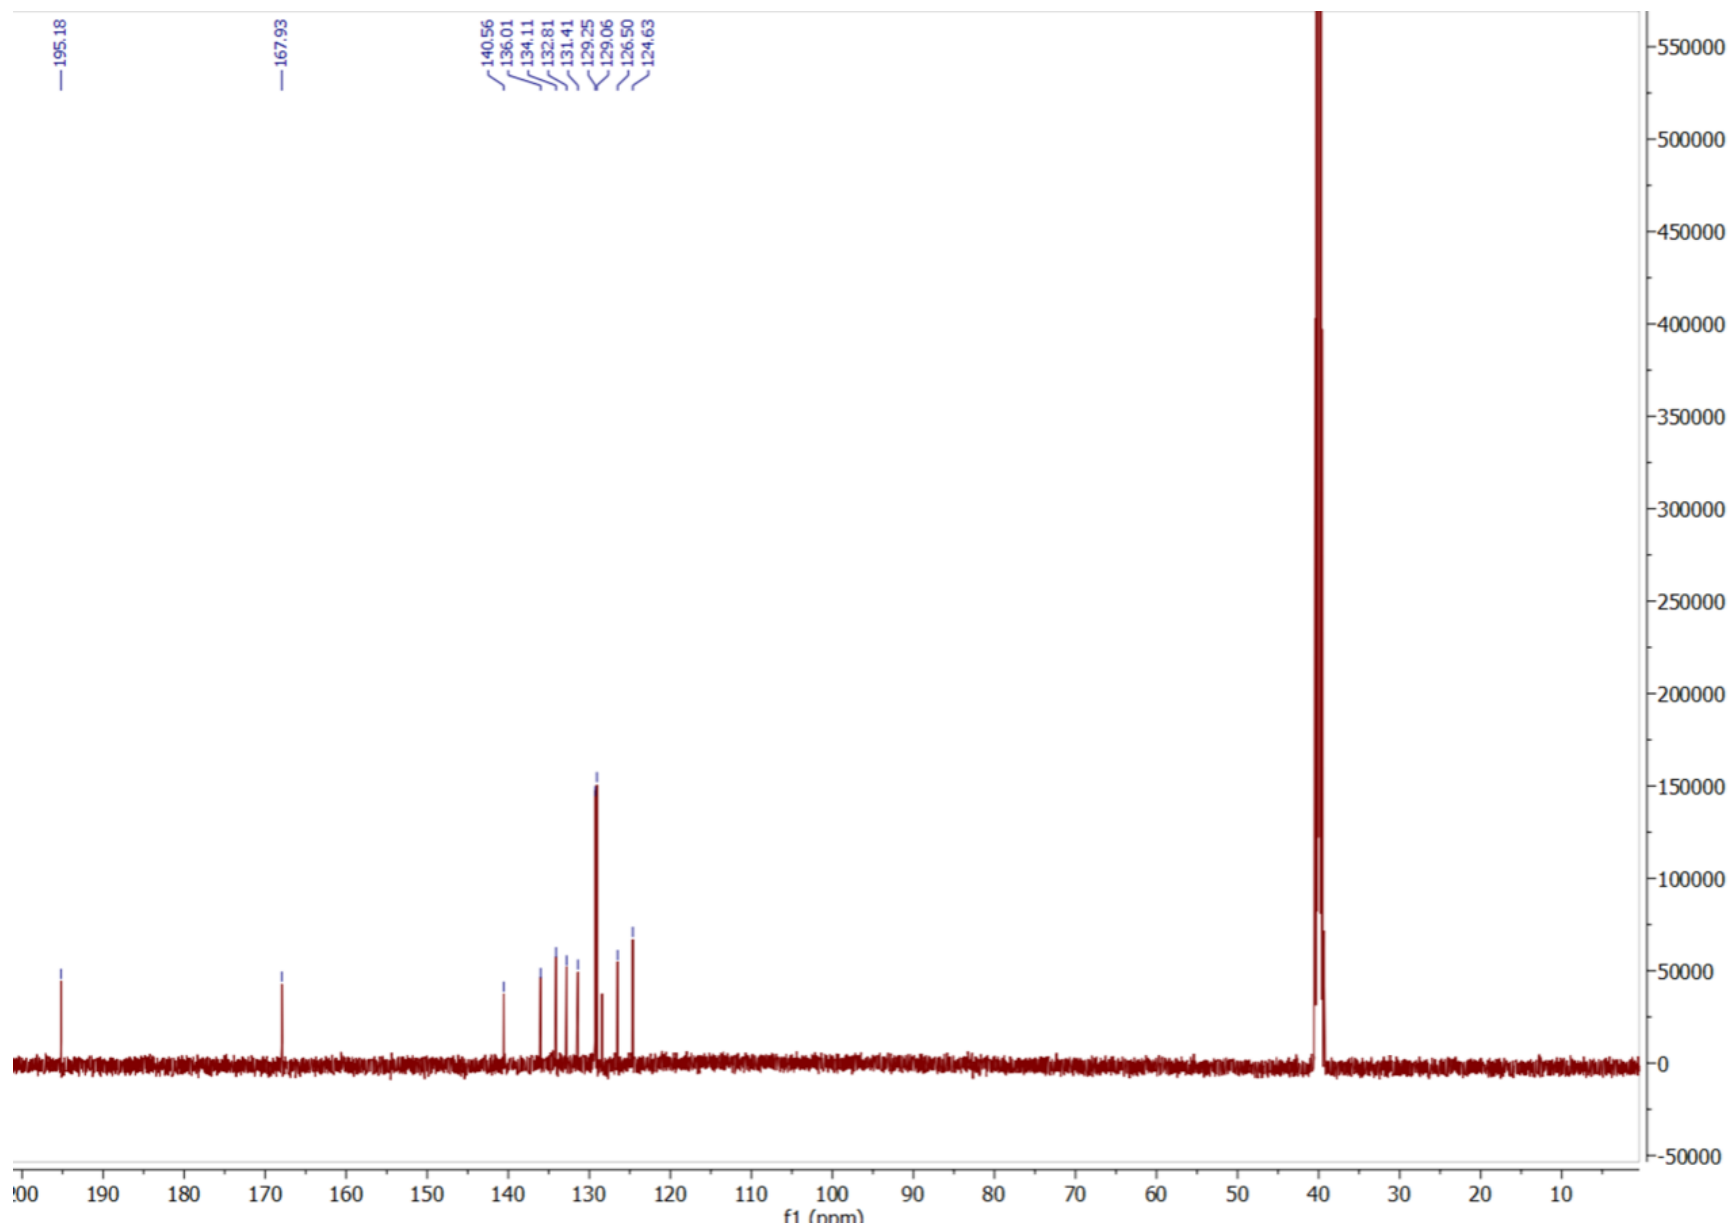

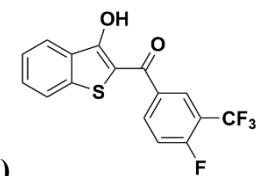

(4-fluoro-3-(trifluoromethyl)phenyl)(3-hydroxybenzo[b]thiophen-2-yl)methanone (5m)

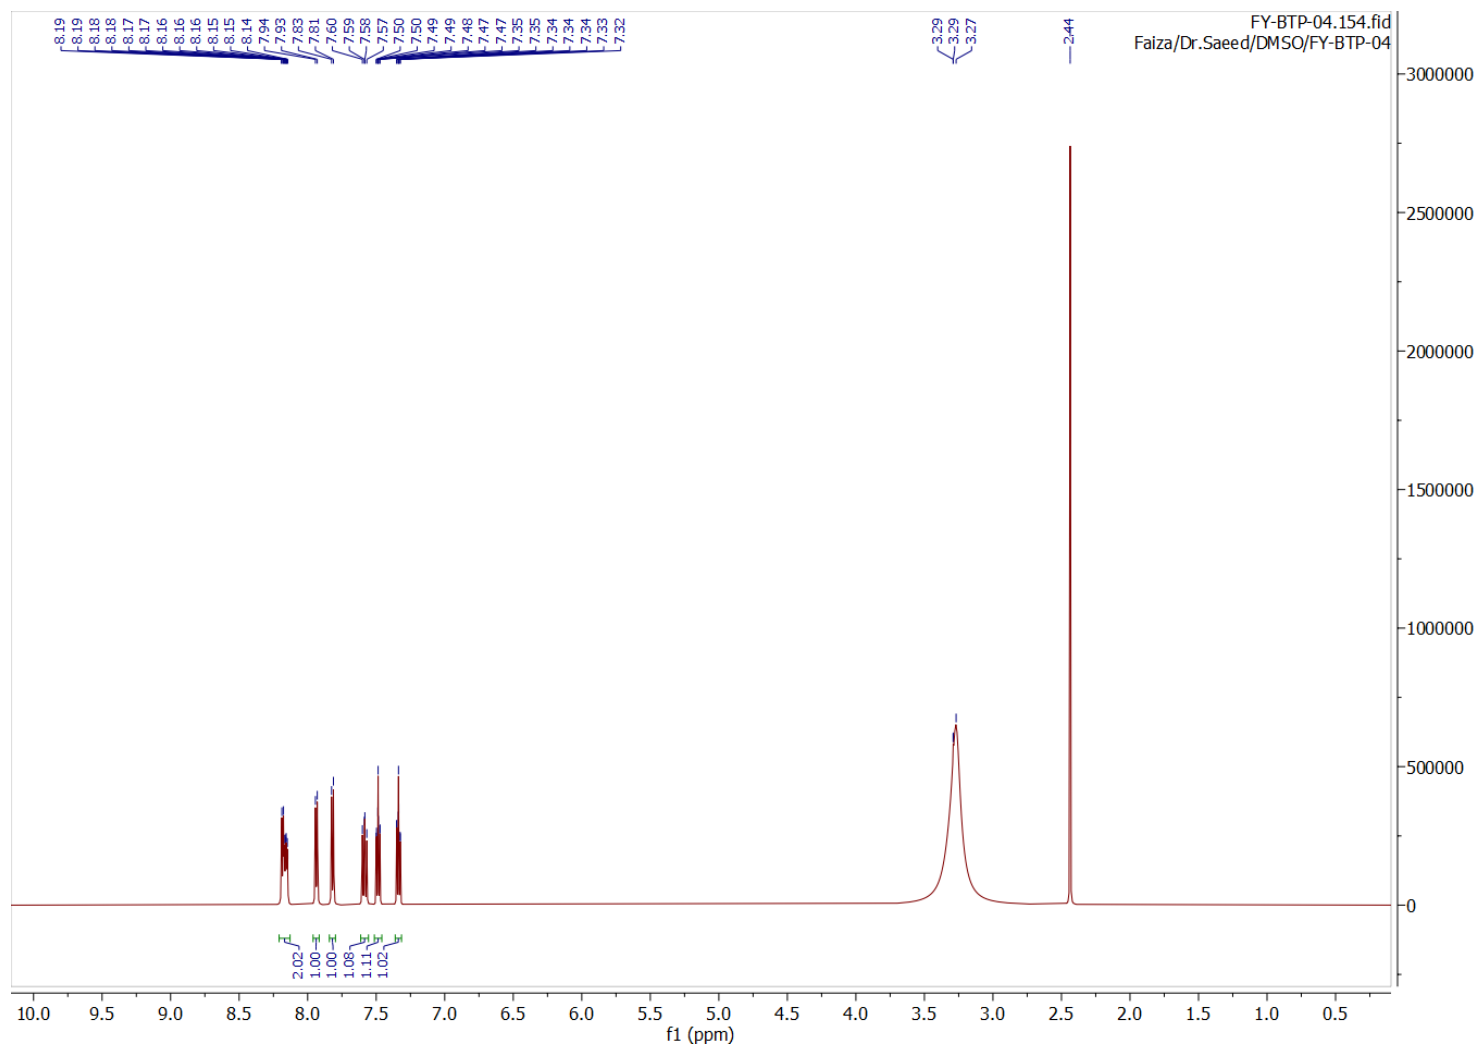

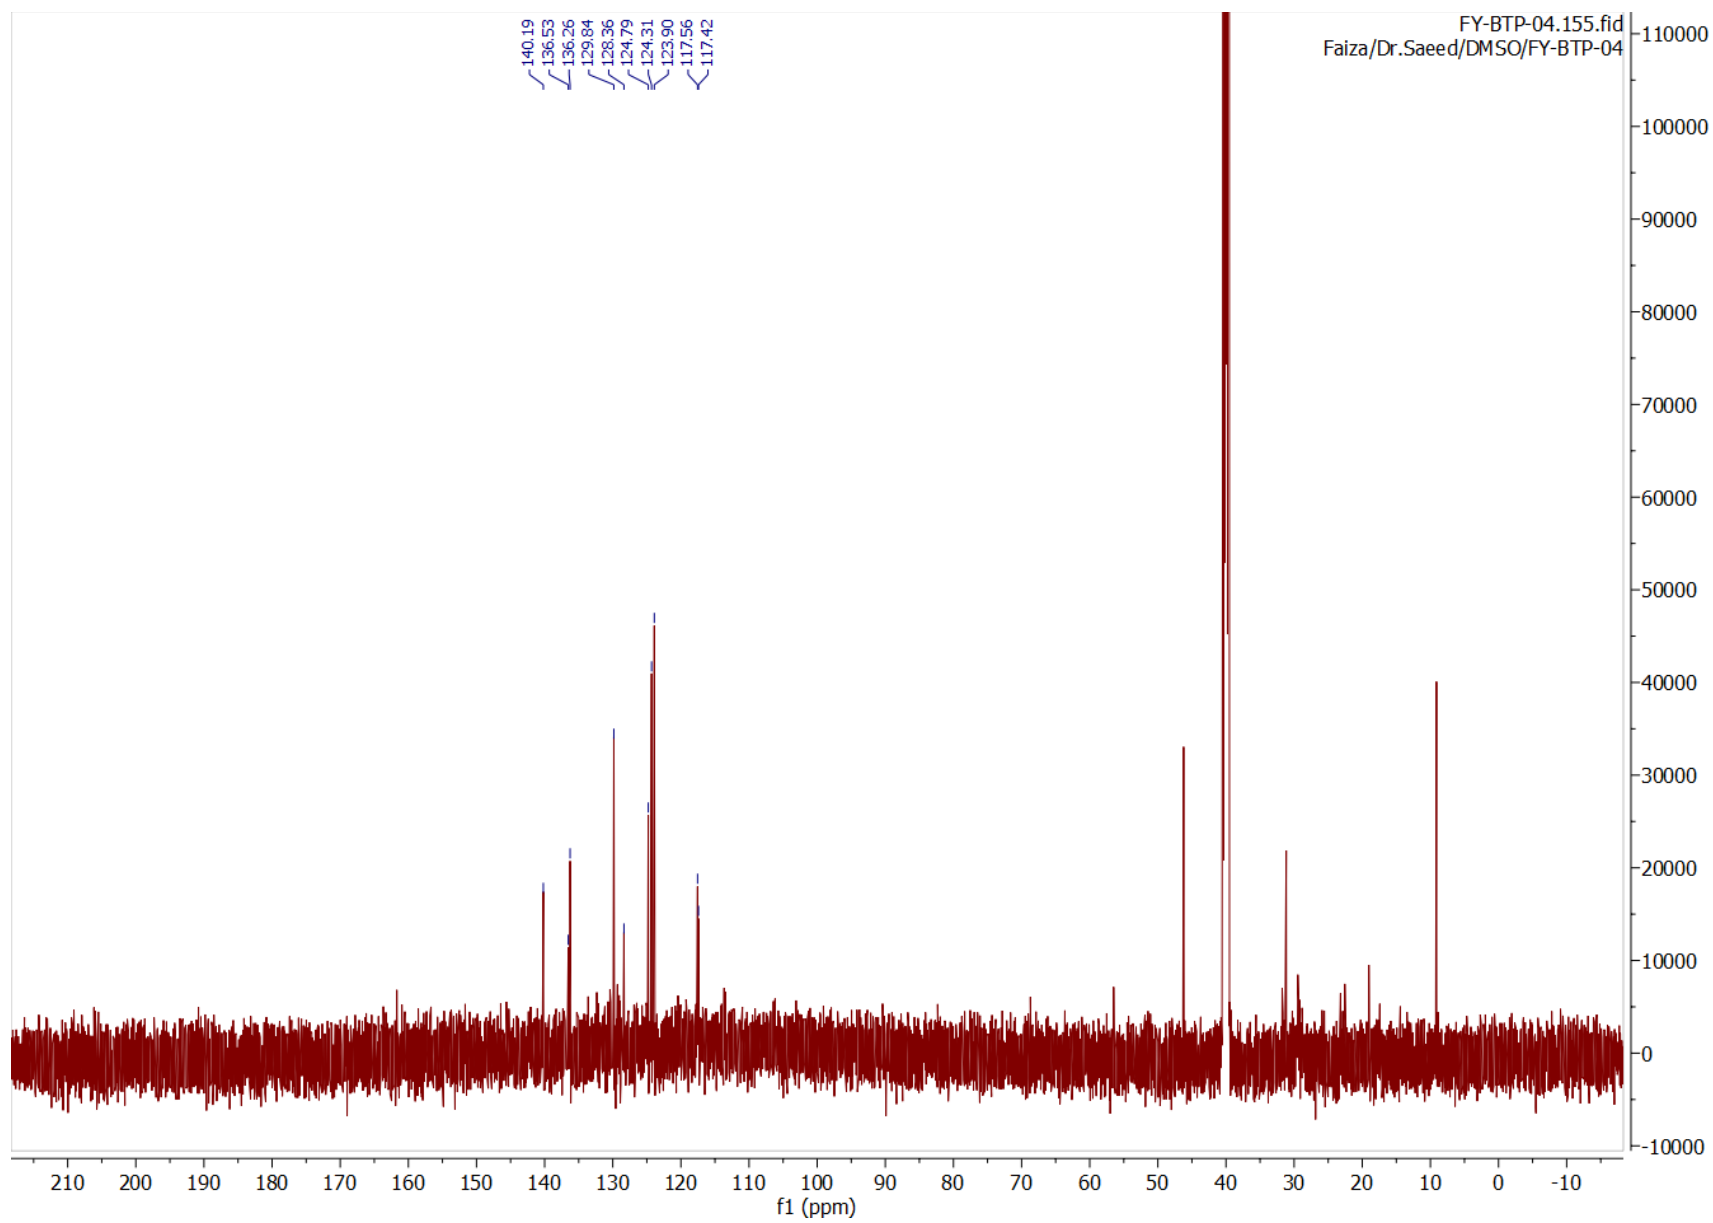

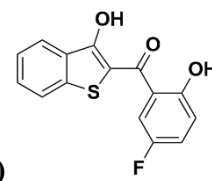

**(5-fluoro-2-hydroxyphenyl)(3-hydroxybenzo[b]thiophen-2-yl)methanone (5n)**

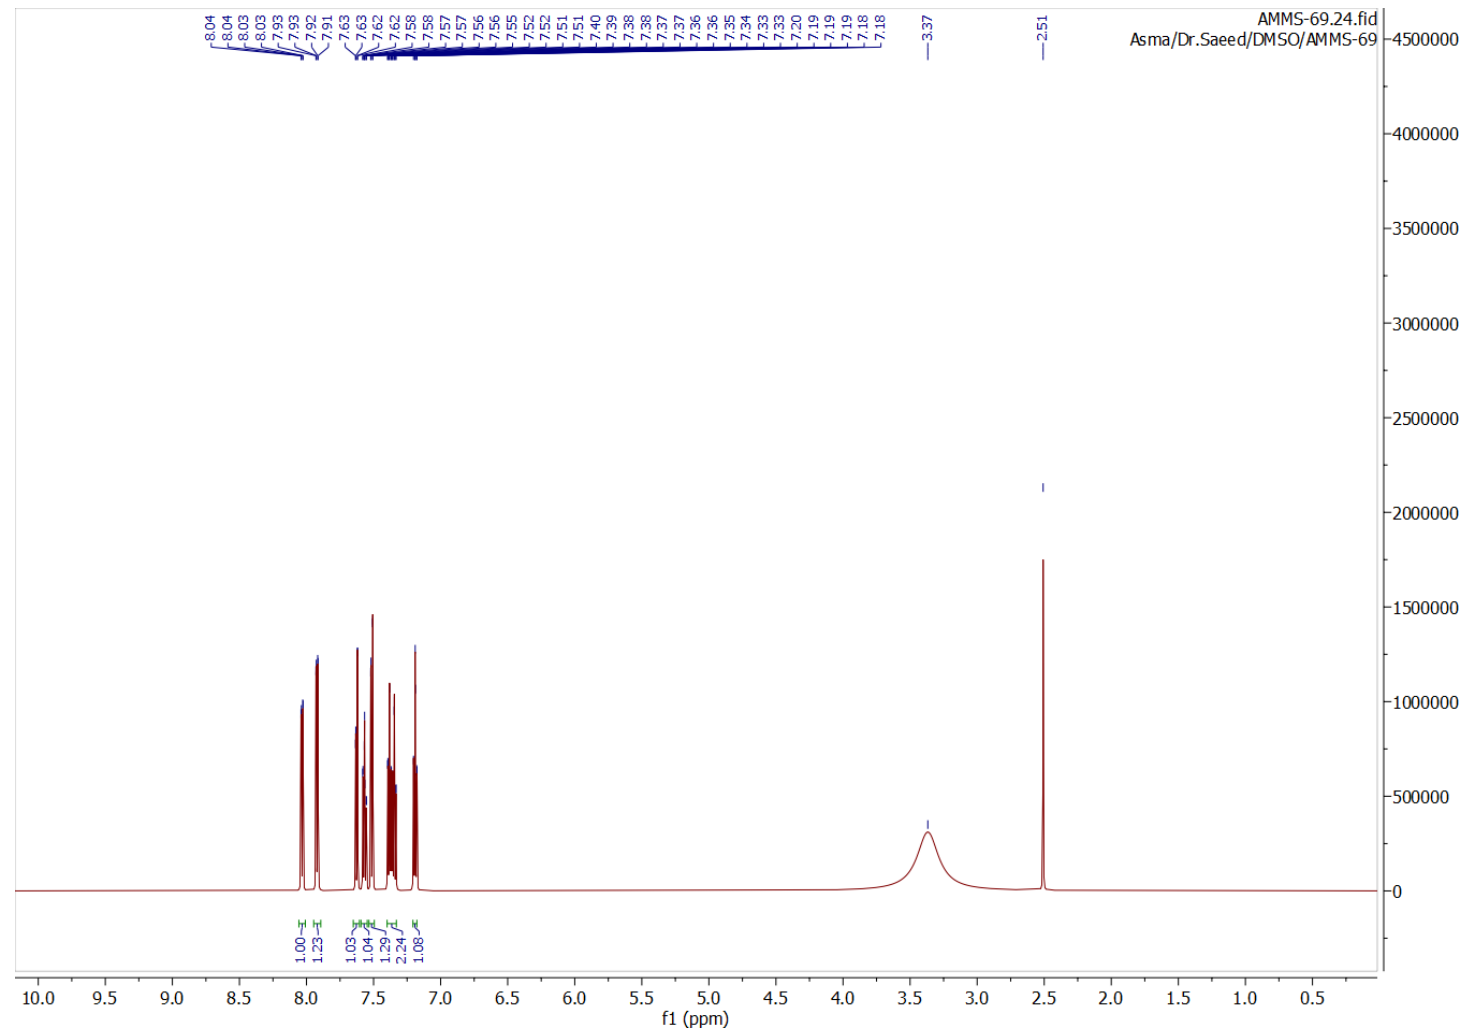

S

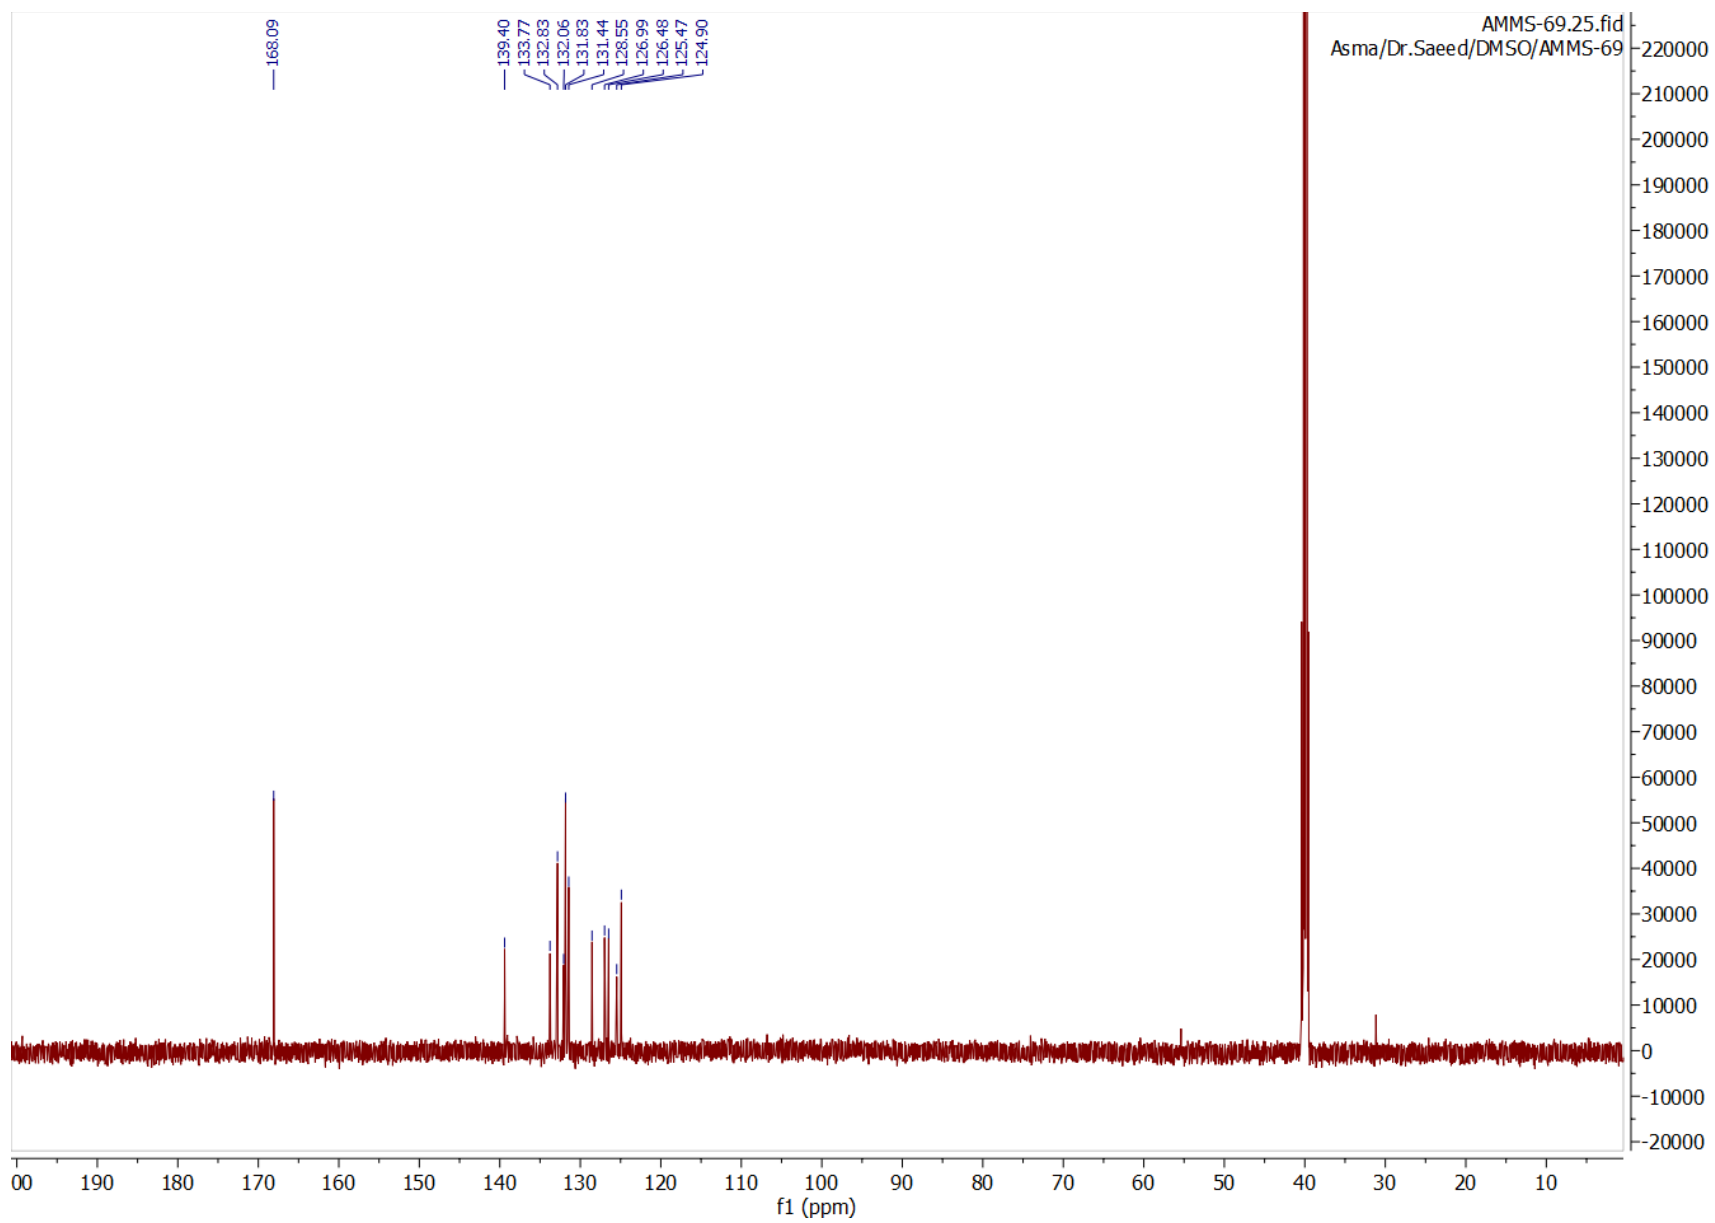

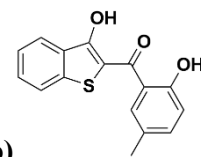

(3-hydroxybenzo[b]thiophen-2-yl)(2-hydroxyphenyl)methanone (5o)

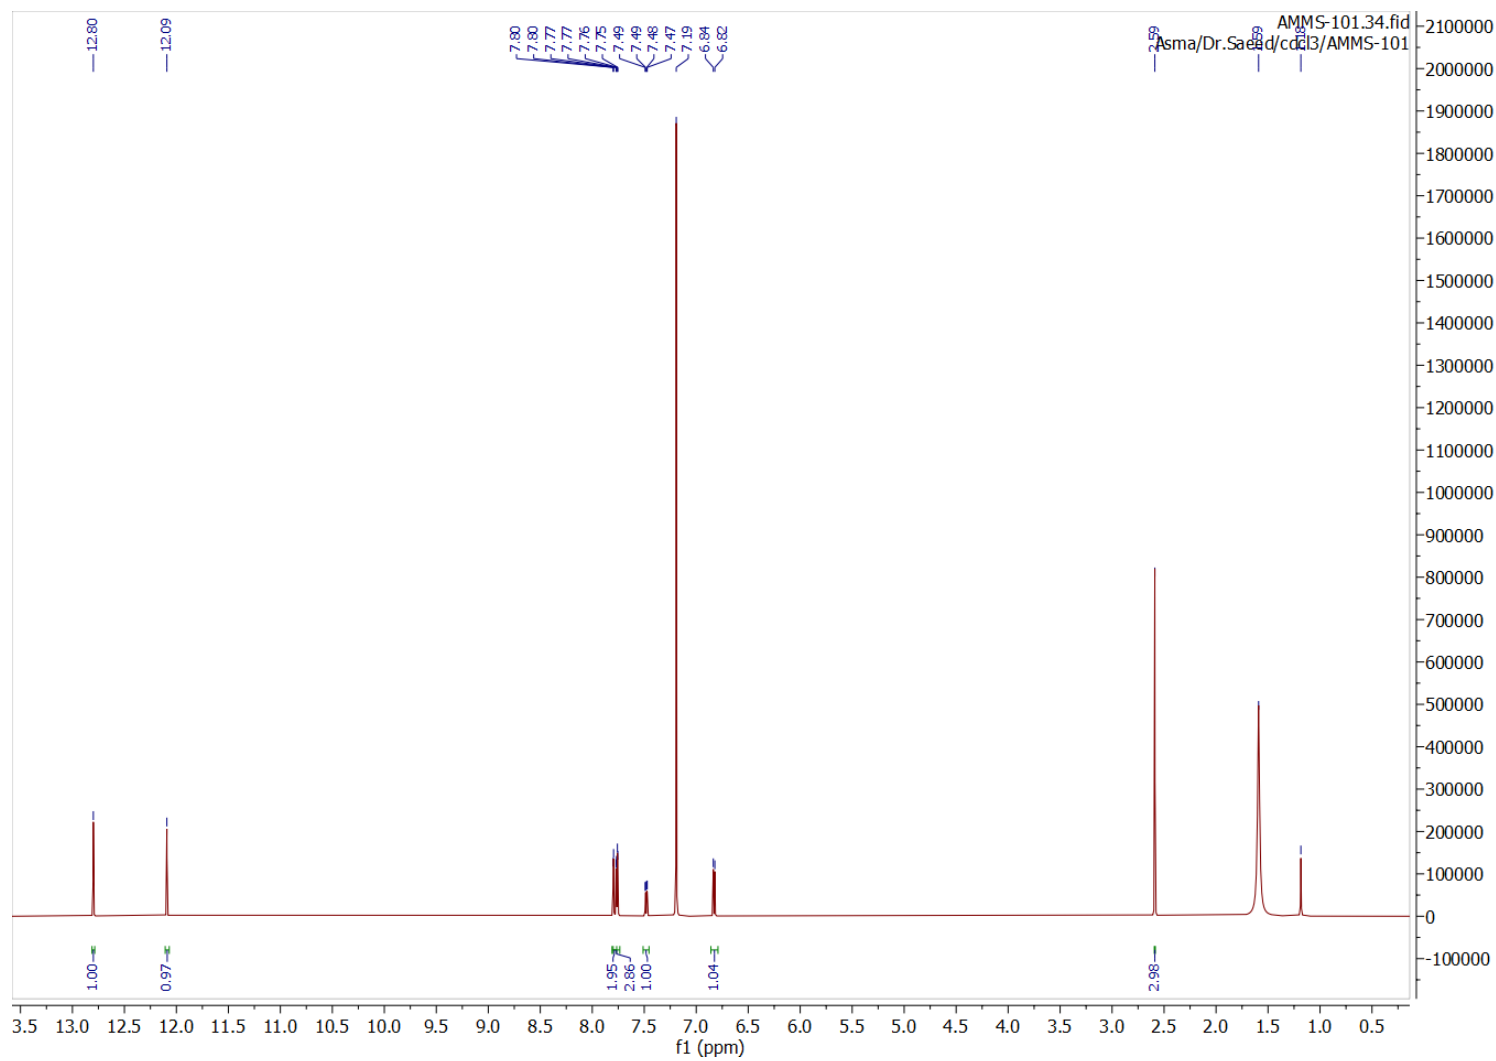



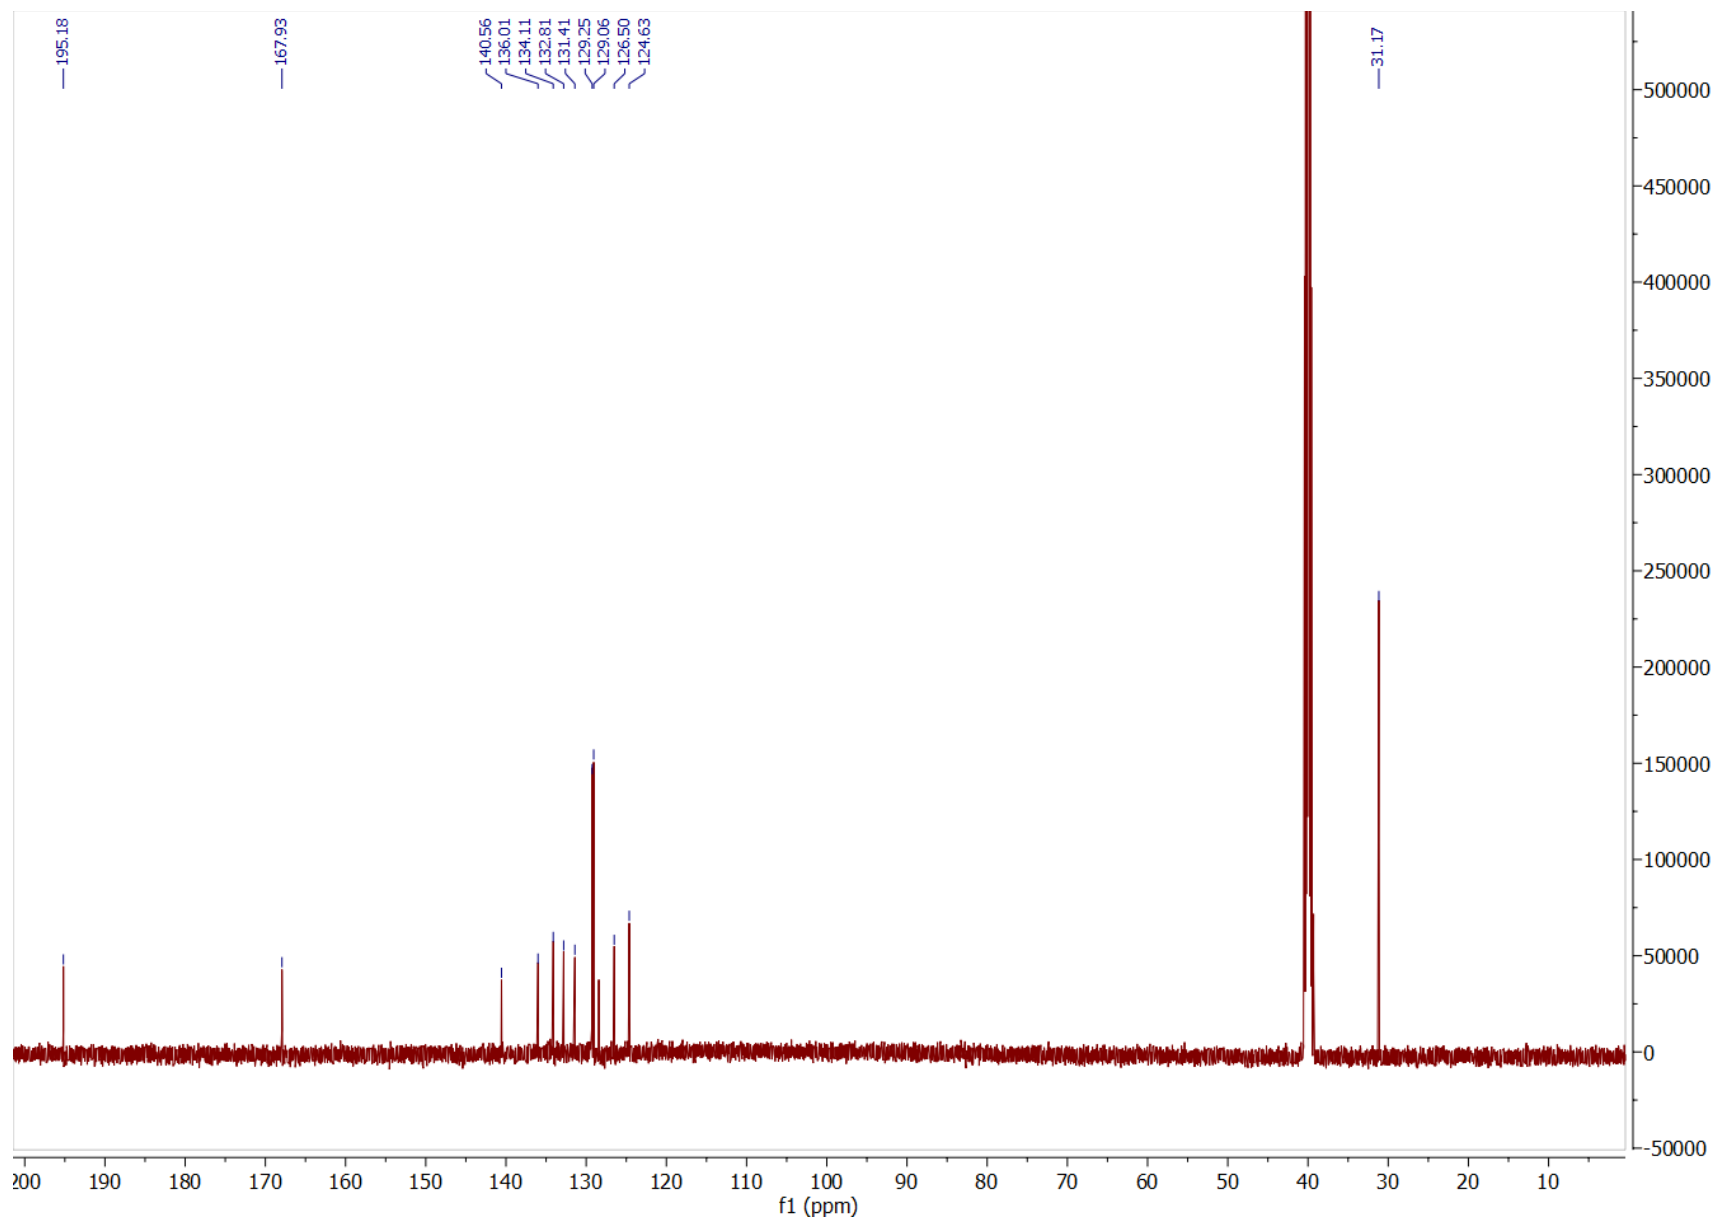

(3-hydroxybenzo[b]thiophen-2-yl)(naphthalen-2-yl)methanone (5p)

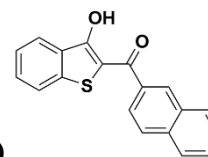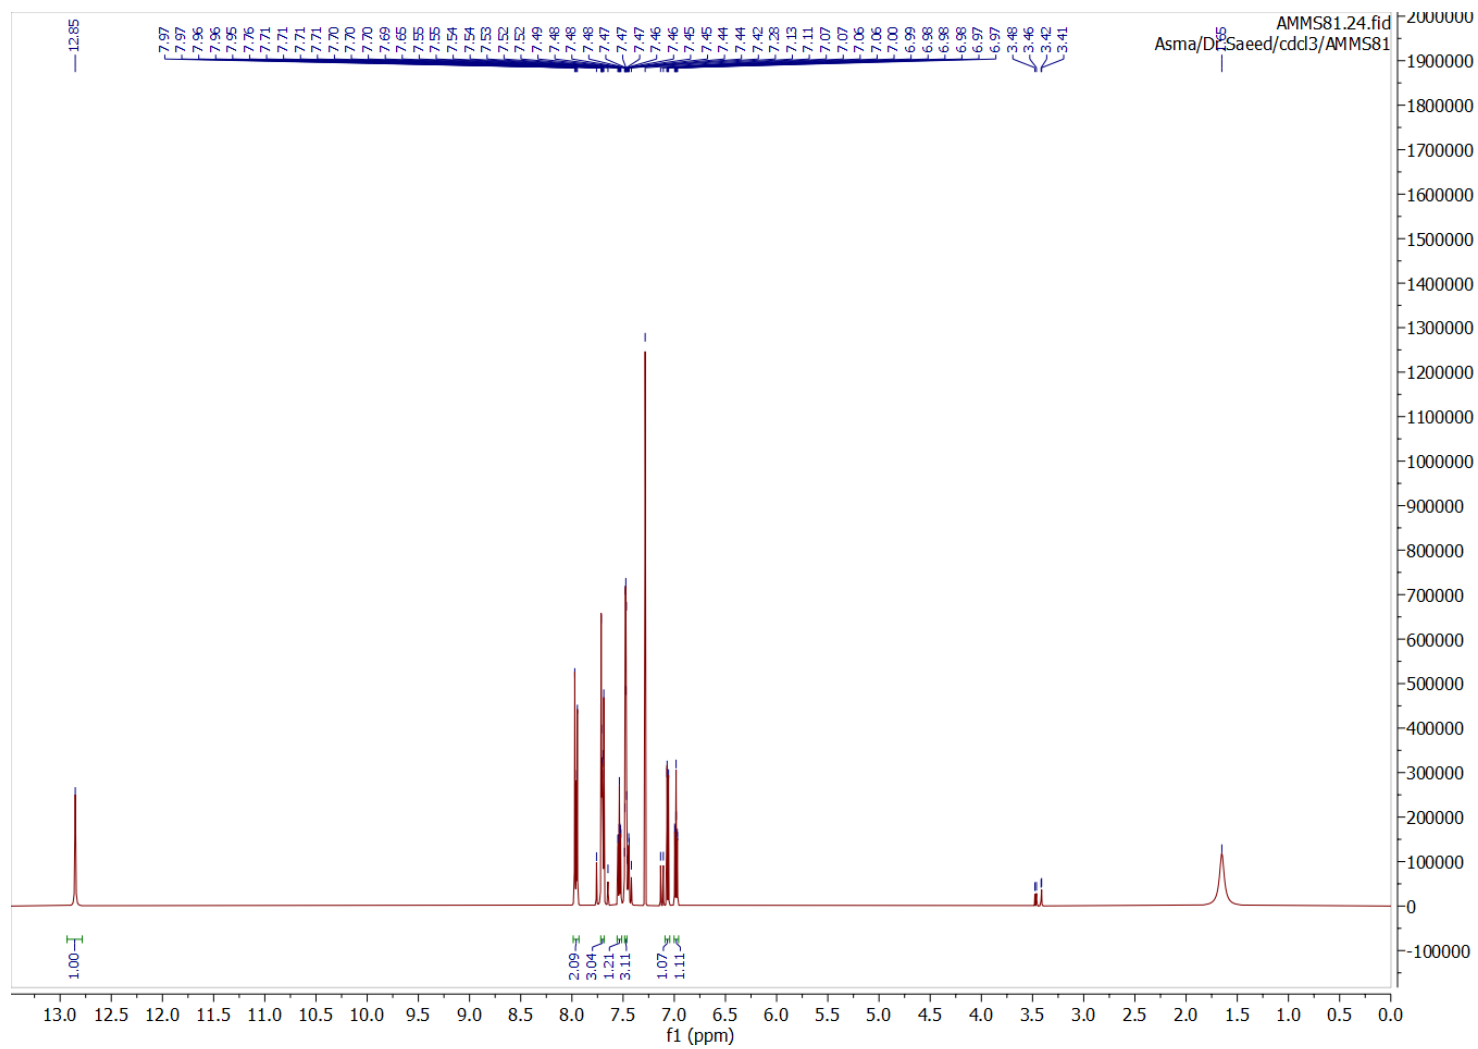

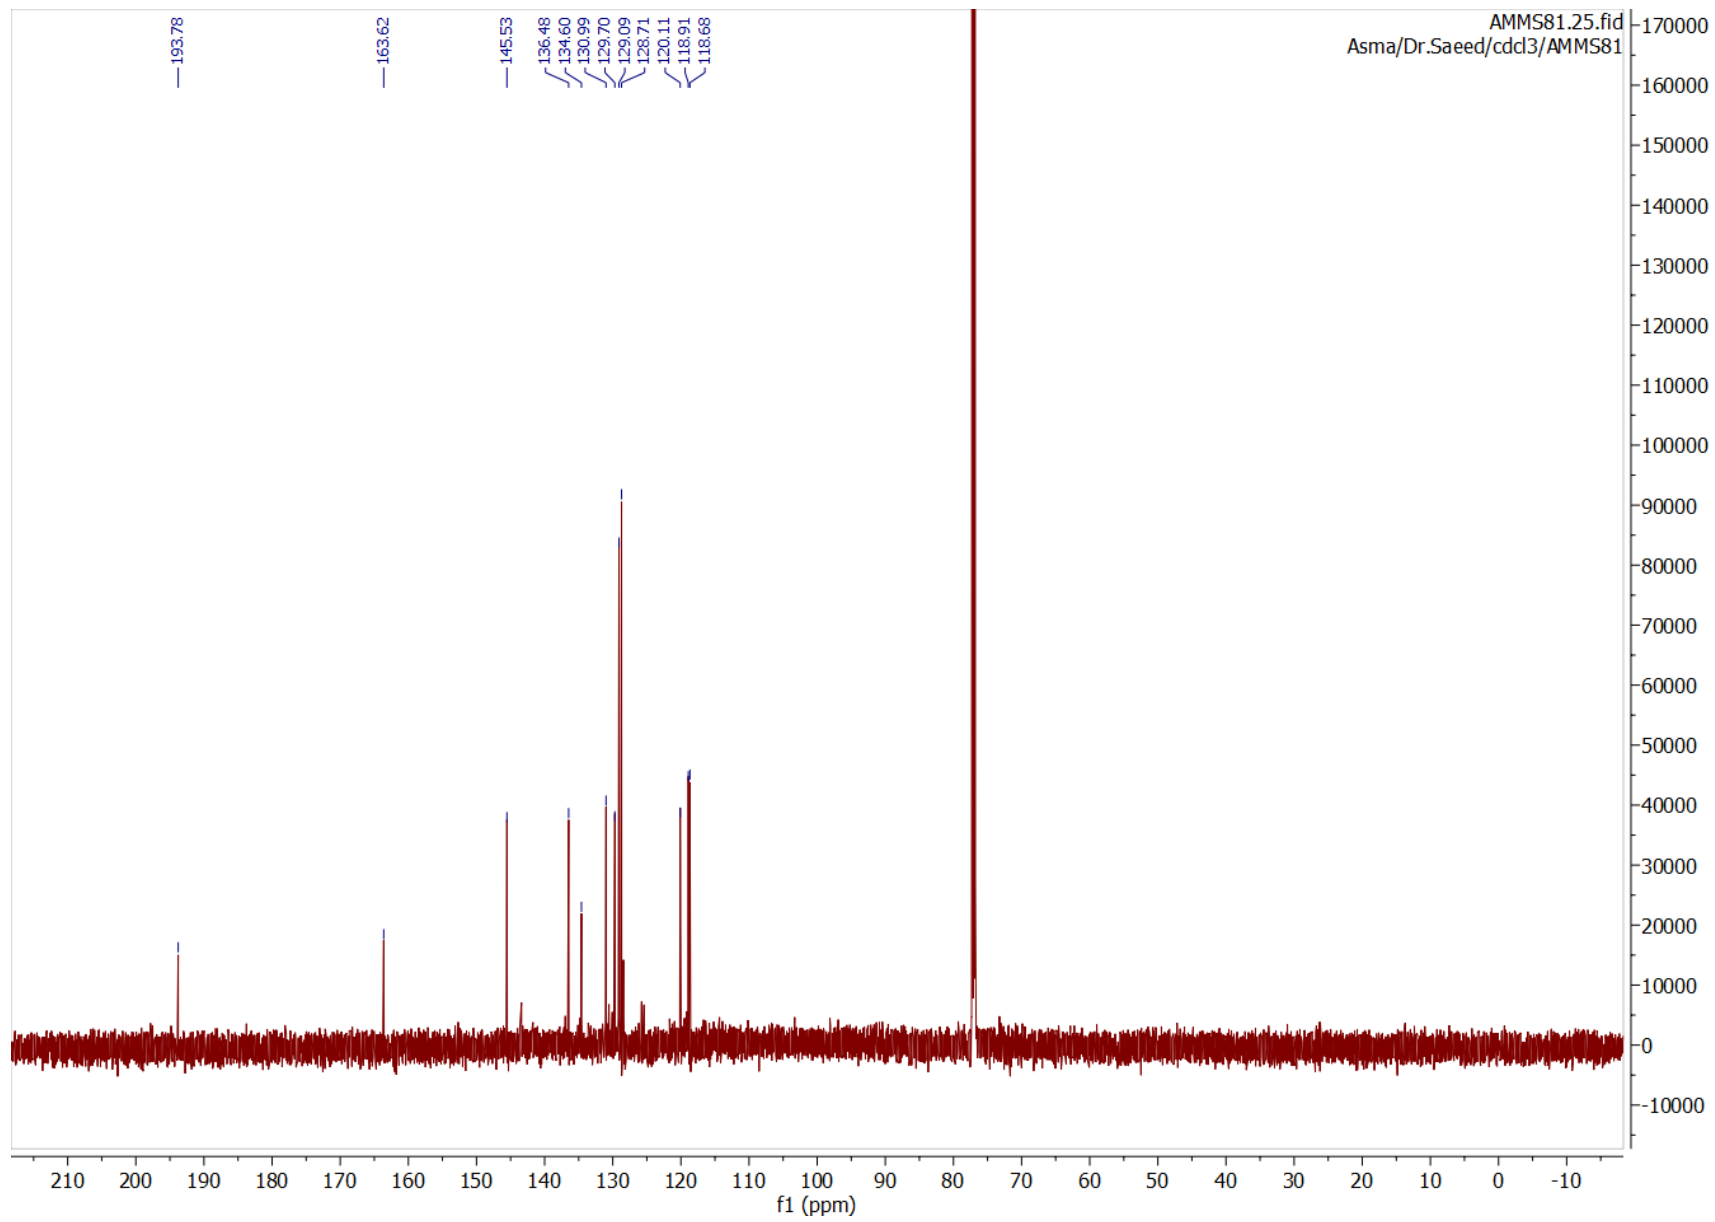

**(3-hydroxybenzo[b]thiophen-2-yl)(naphthalen-1-yl)methanone (5q)**

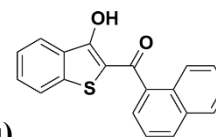

Asma/Dr. Saeed/DMSO/AMMS84

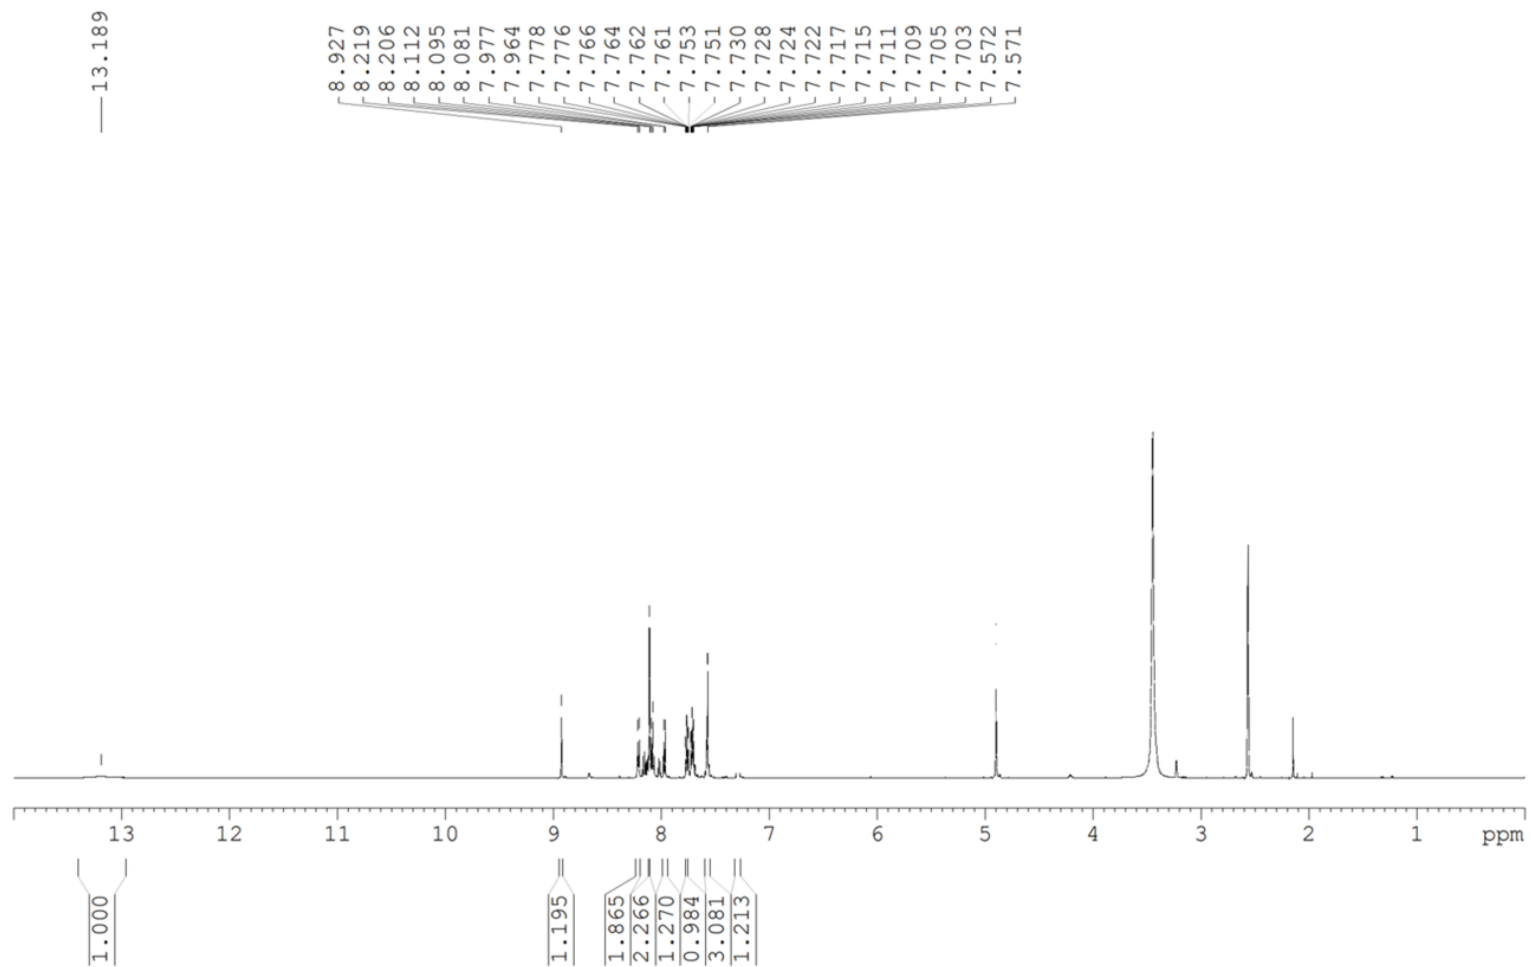

Asma/Dr. Saeed/DMSO/AMMS84

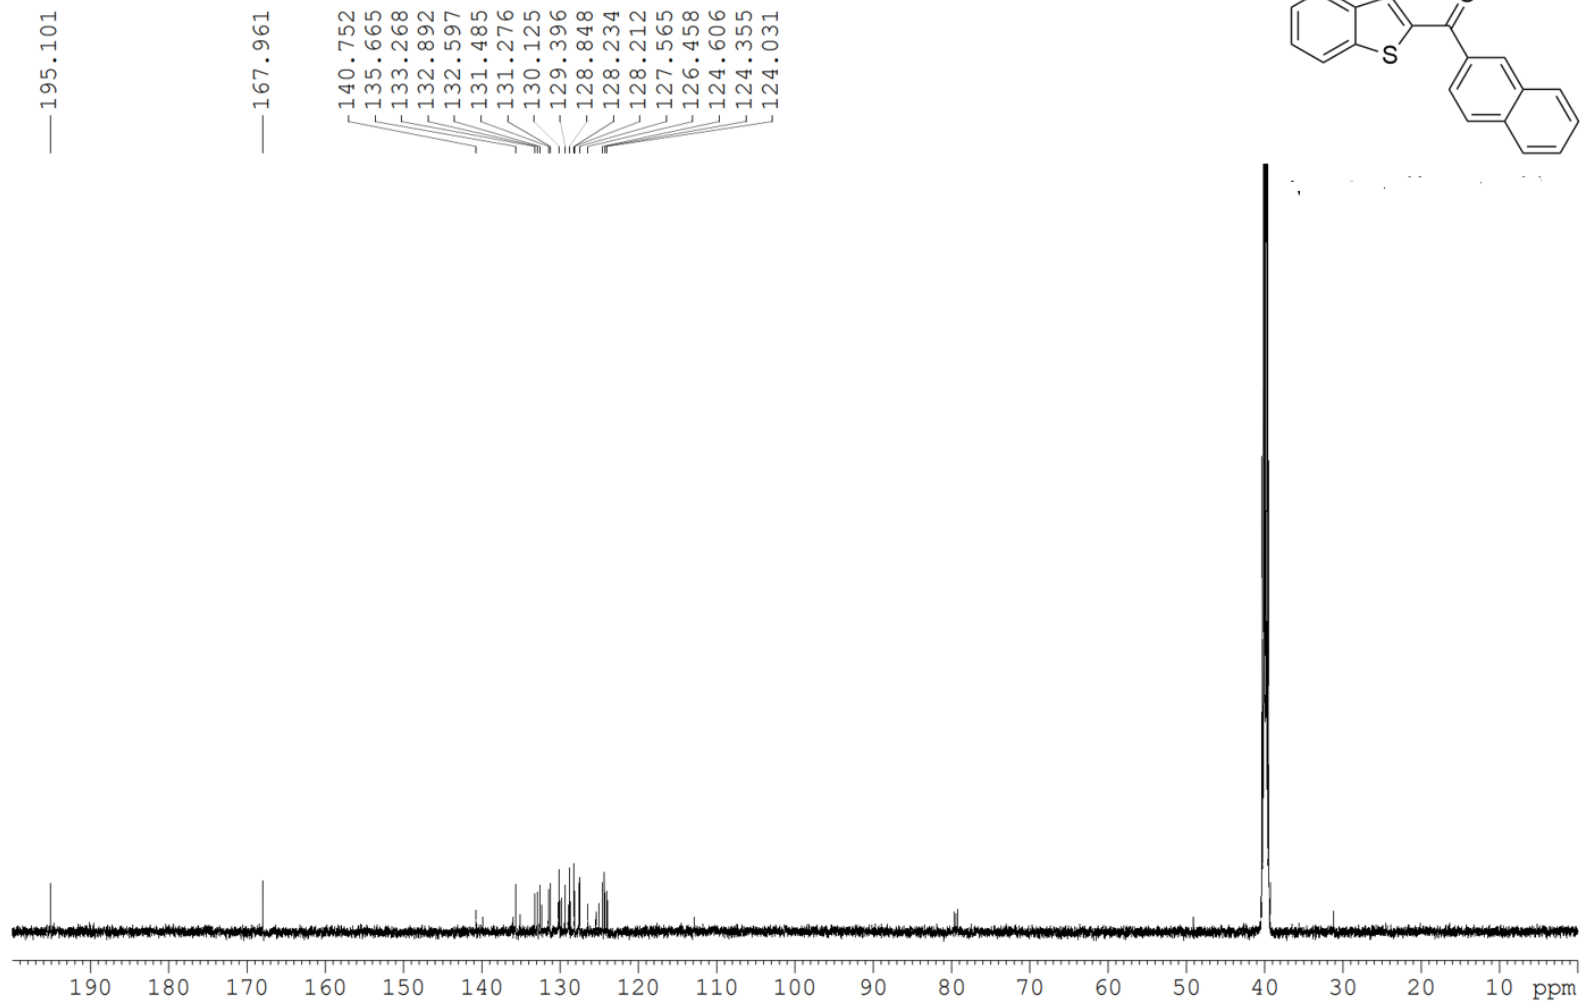

**(6-bromopyridin-2-yl)(3-hydroxybenzo[b]thiophen-2-yl)methanone (5r)**

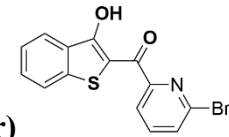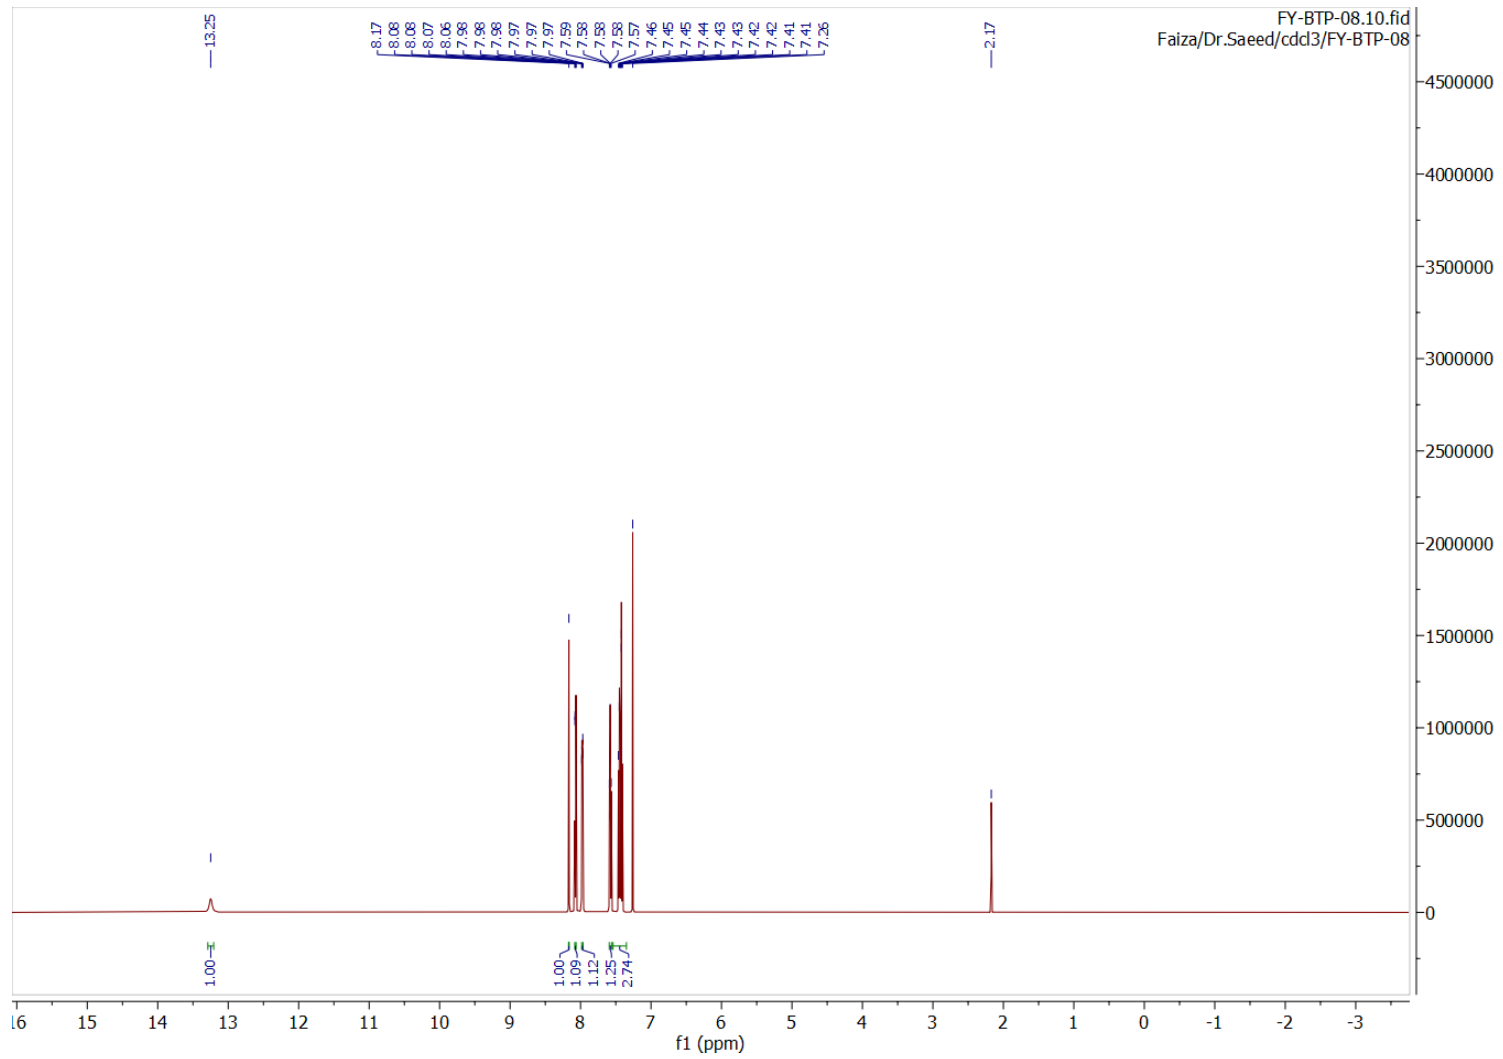

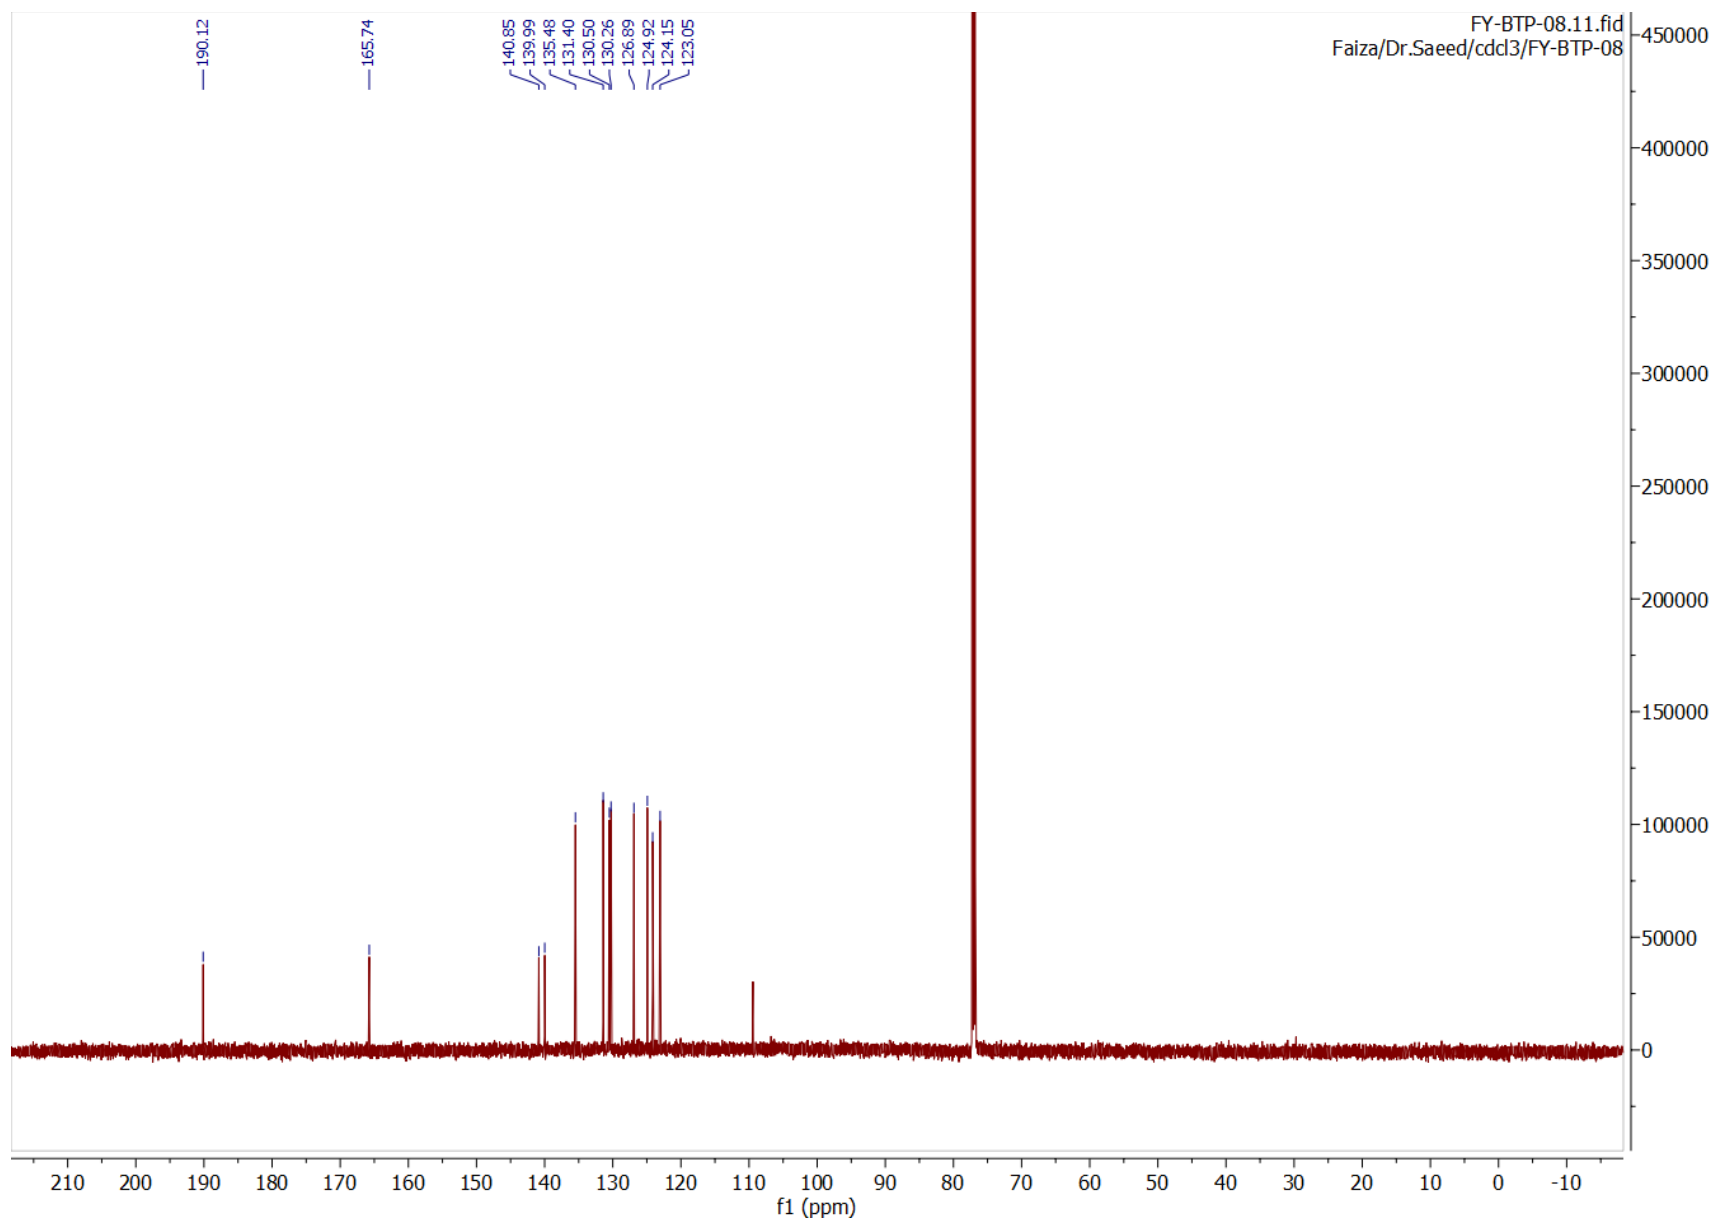

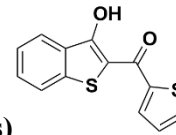

(3-hydroxybenzo[b]thiophen-2-yl)(thiophen-2-yl)methanone (5s)

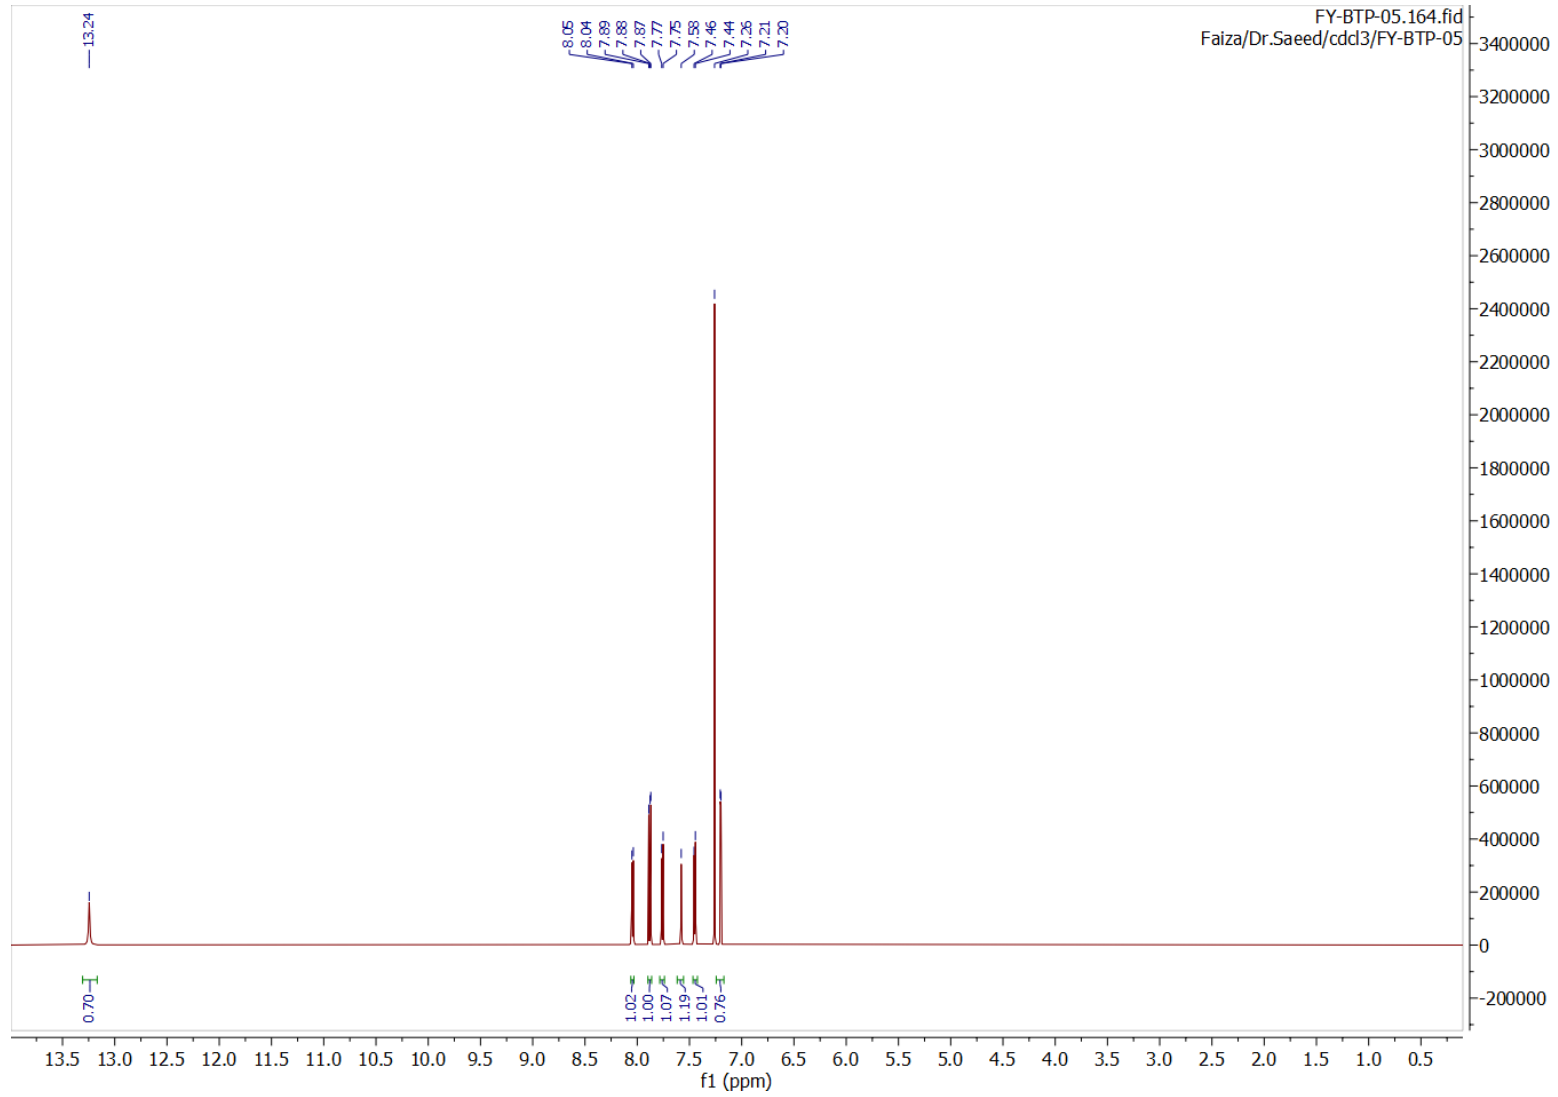



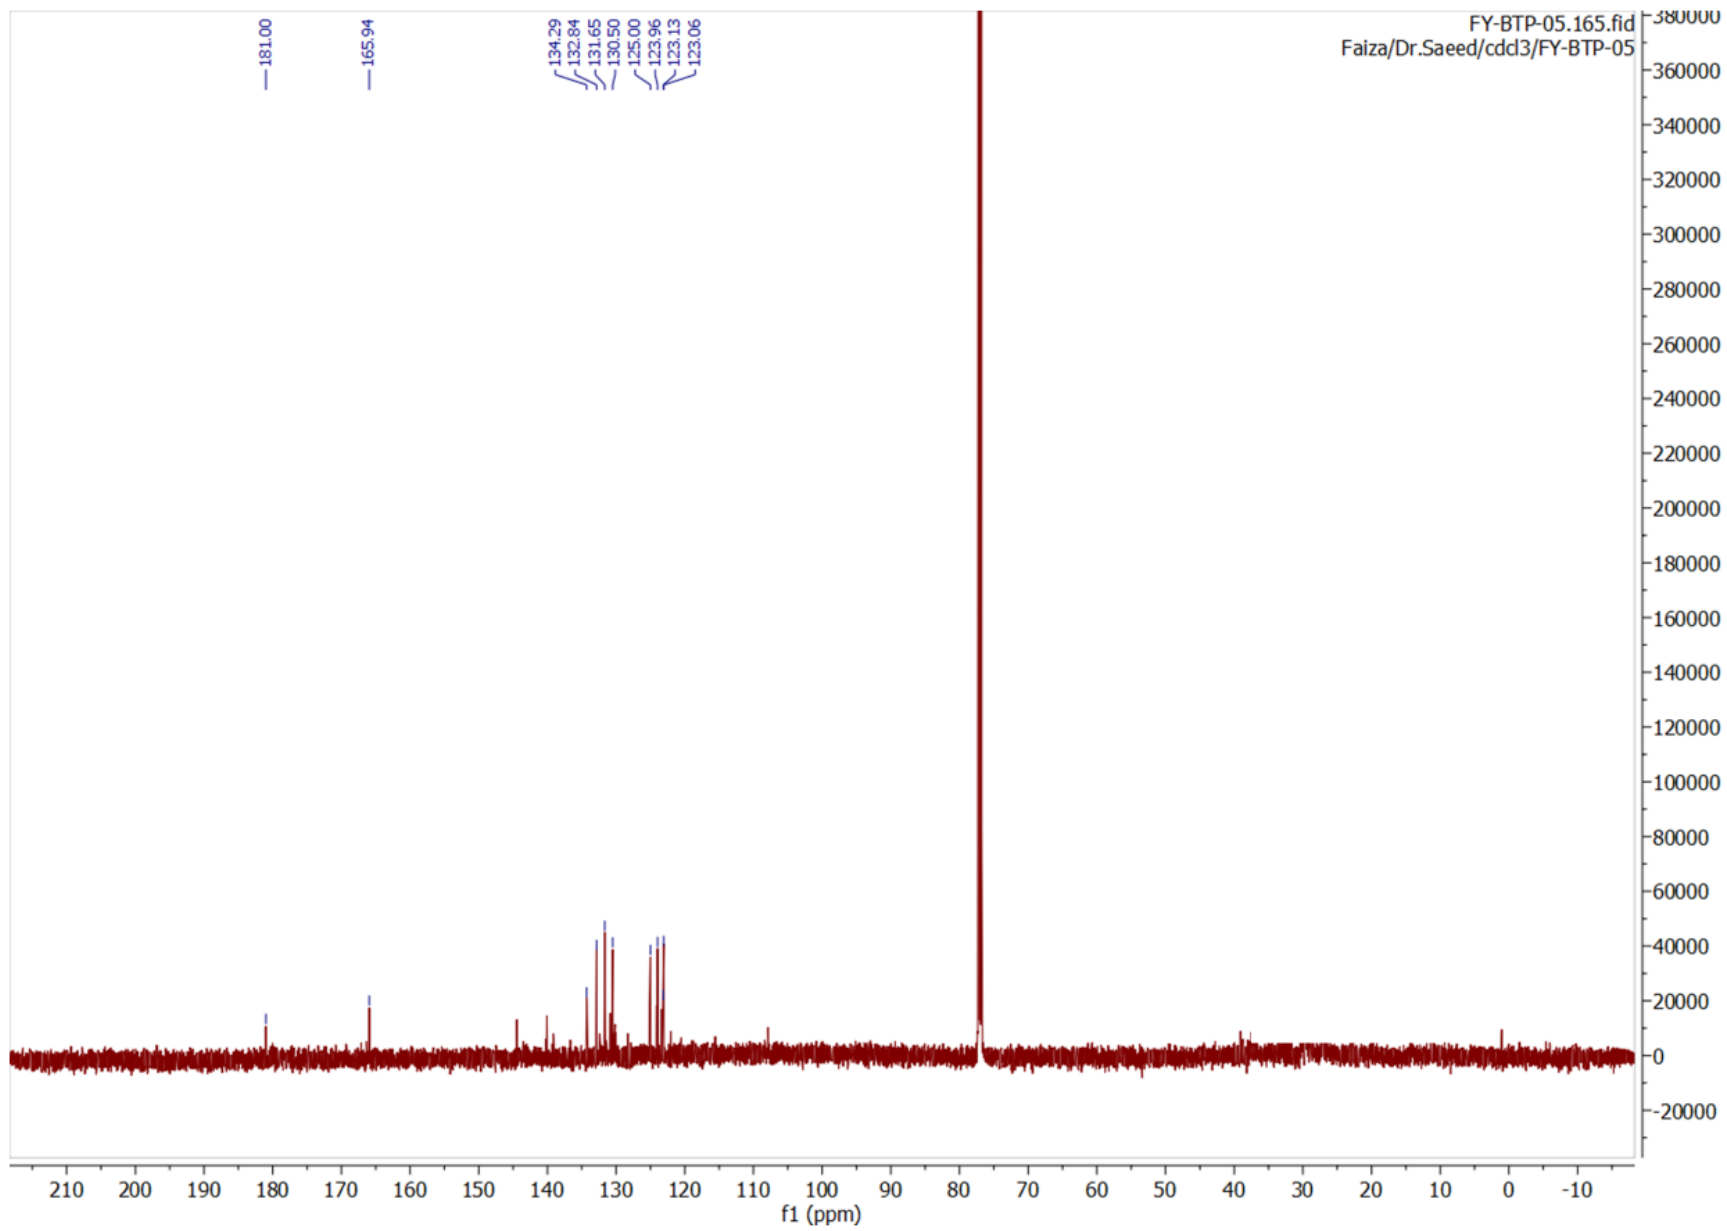

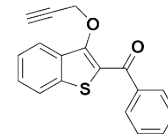

Phenyl(3-(prop-2-yn-1-yloxy)benzo[b]thiophen-2-yl)methanone (11a).

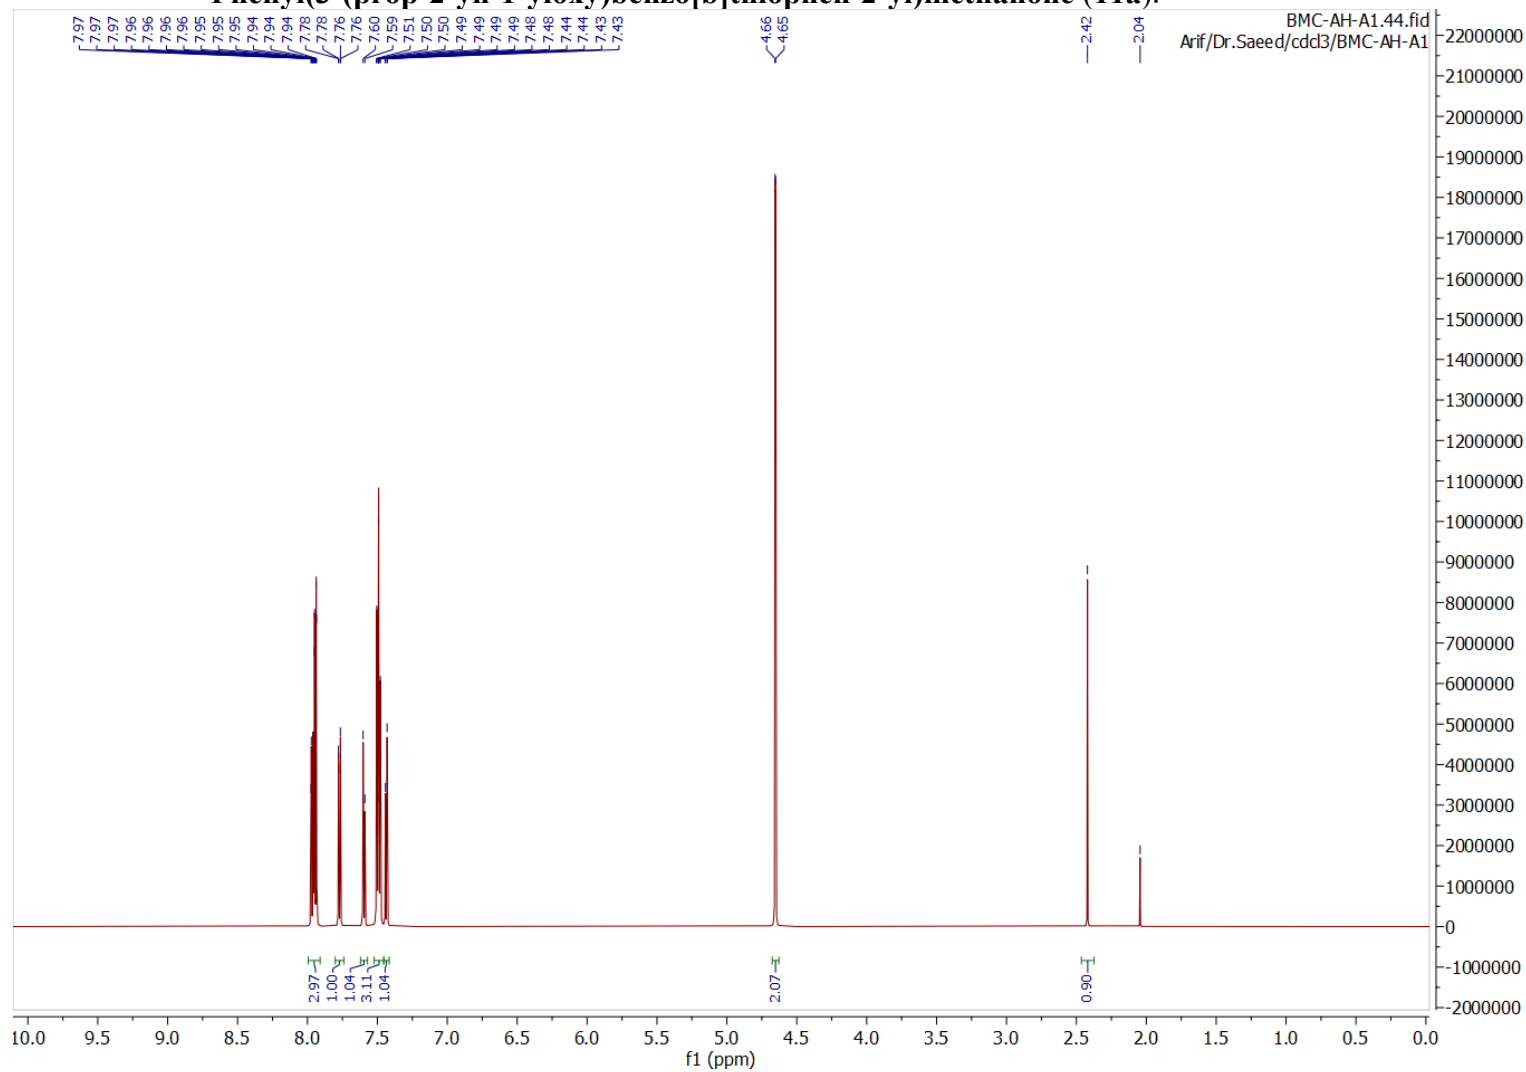

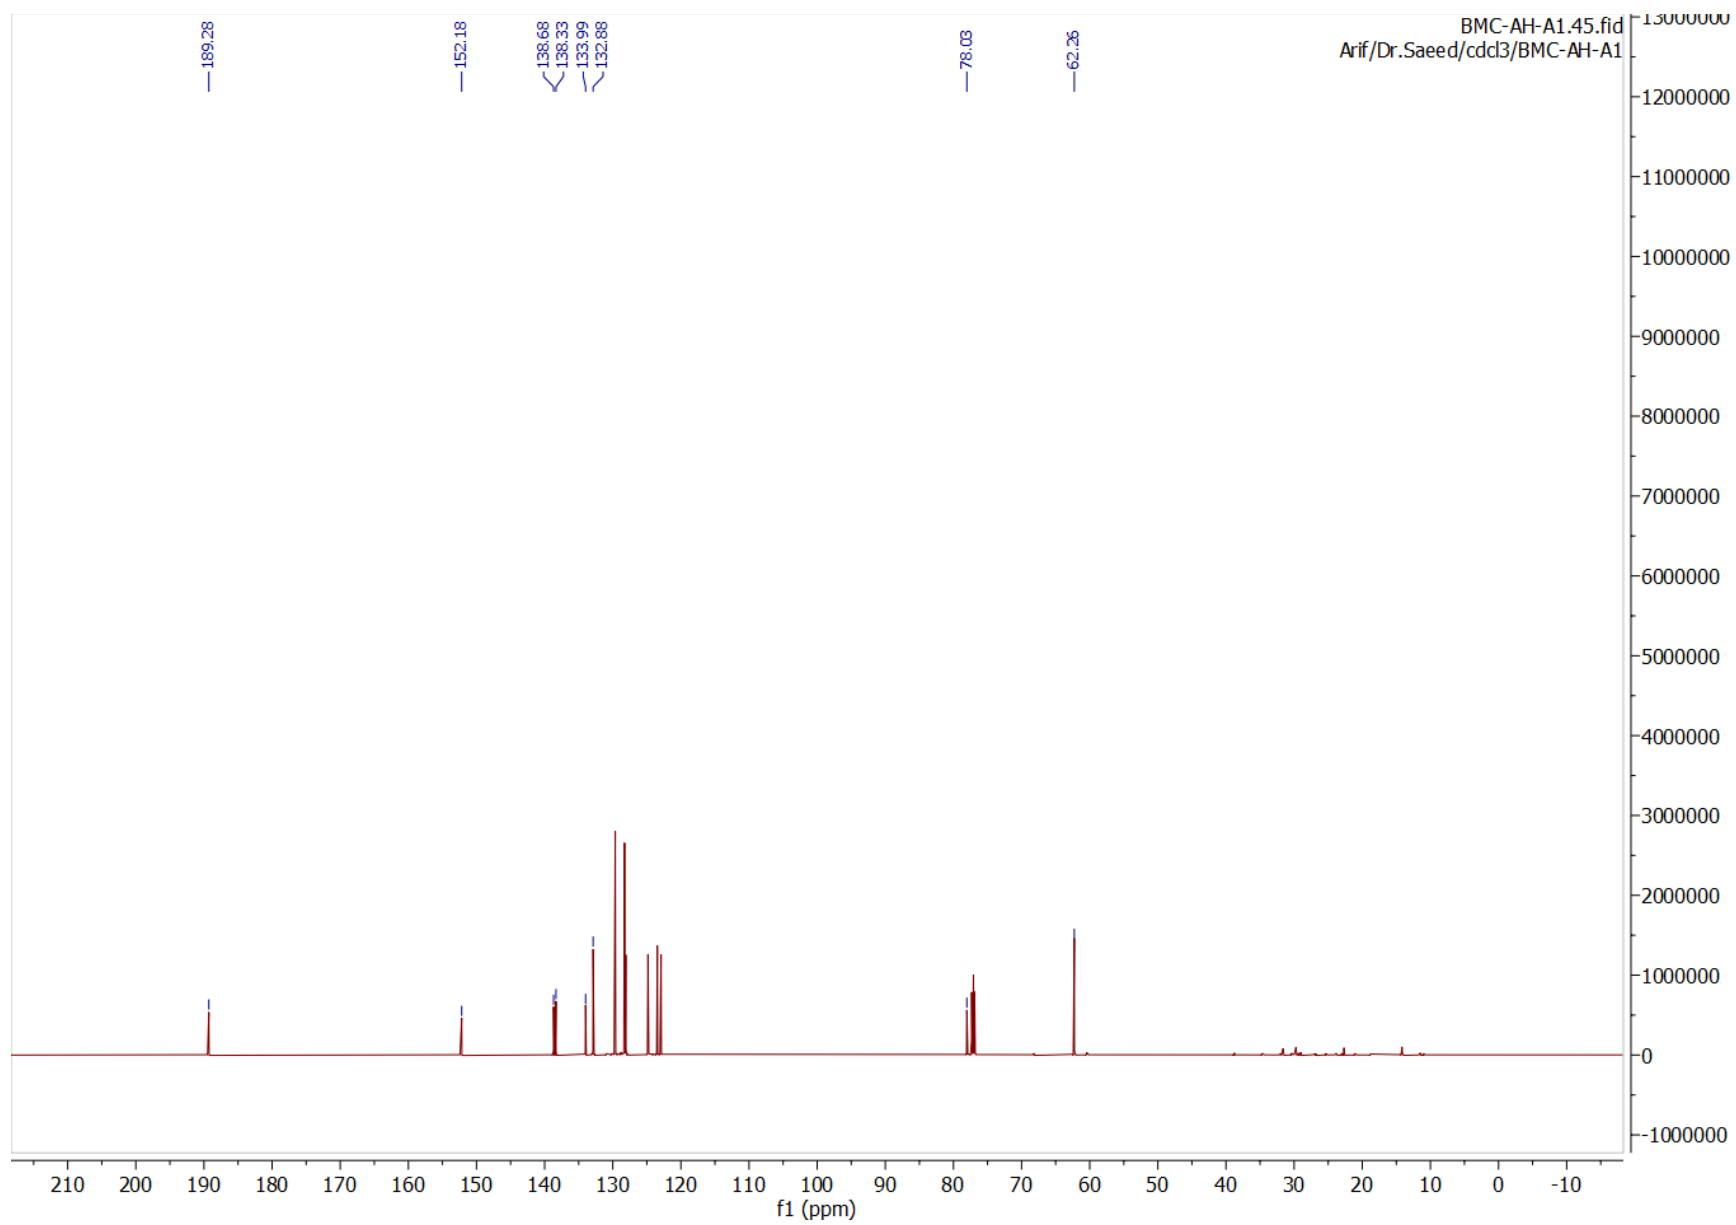

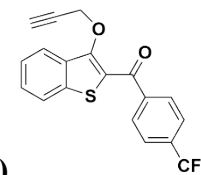

**(3-(prop-2-yn-1-yloxy)benzo[b]thiophen-2-yl)(4-(trifluoromethyl)phenyl)methanone (11b).**

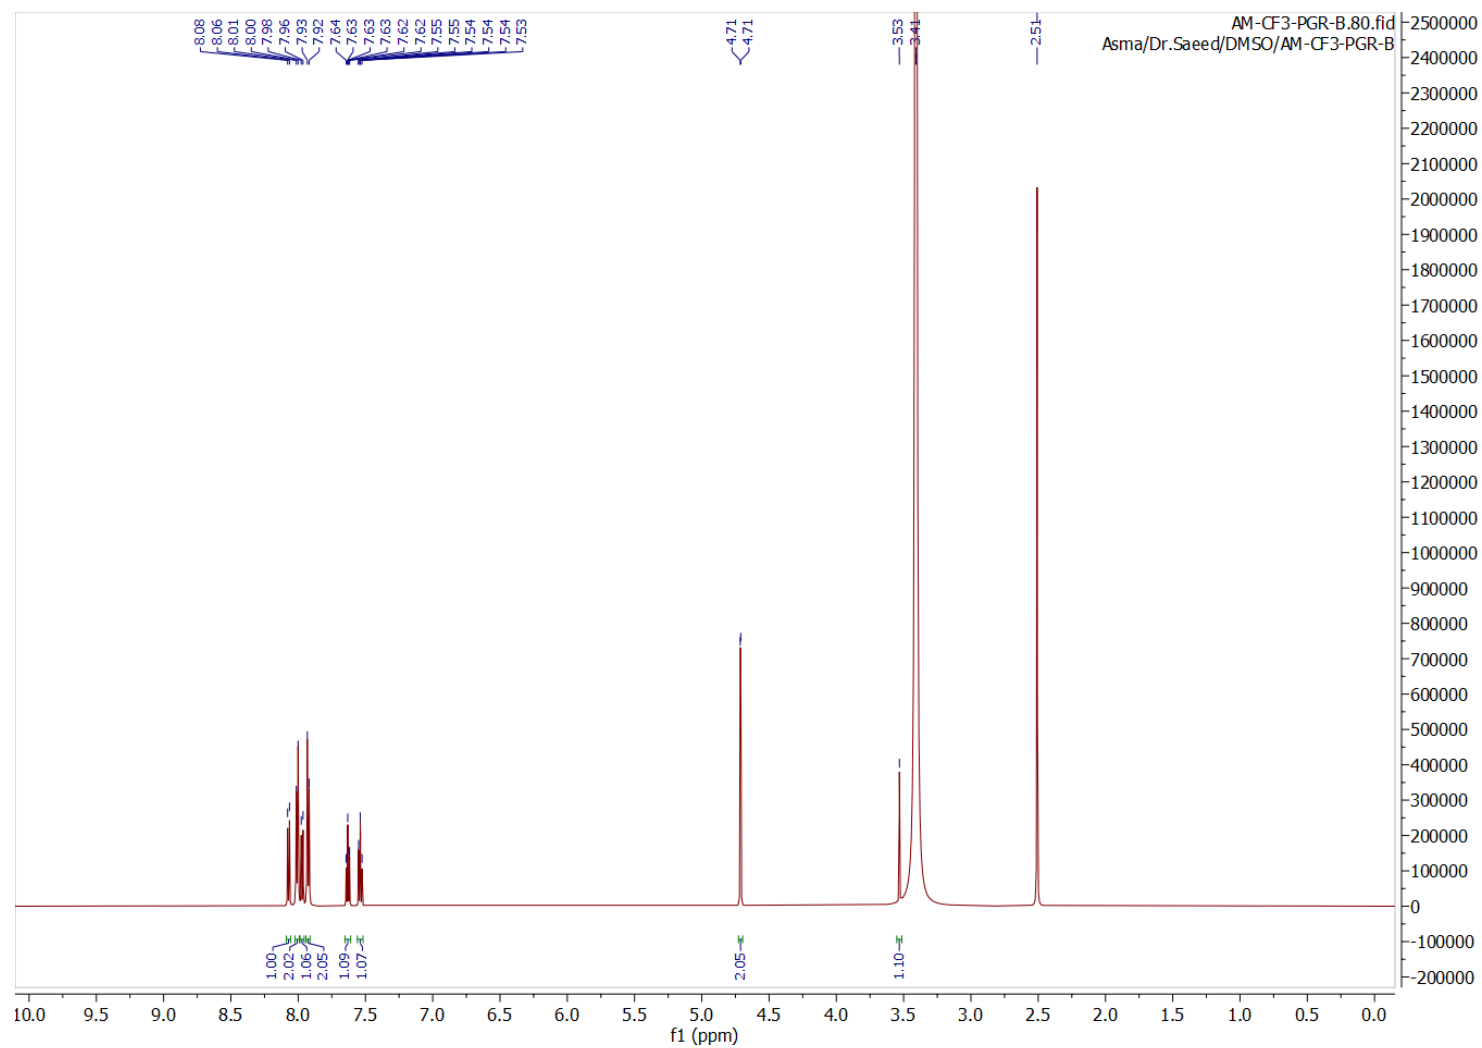

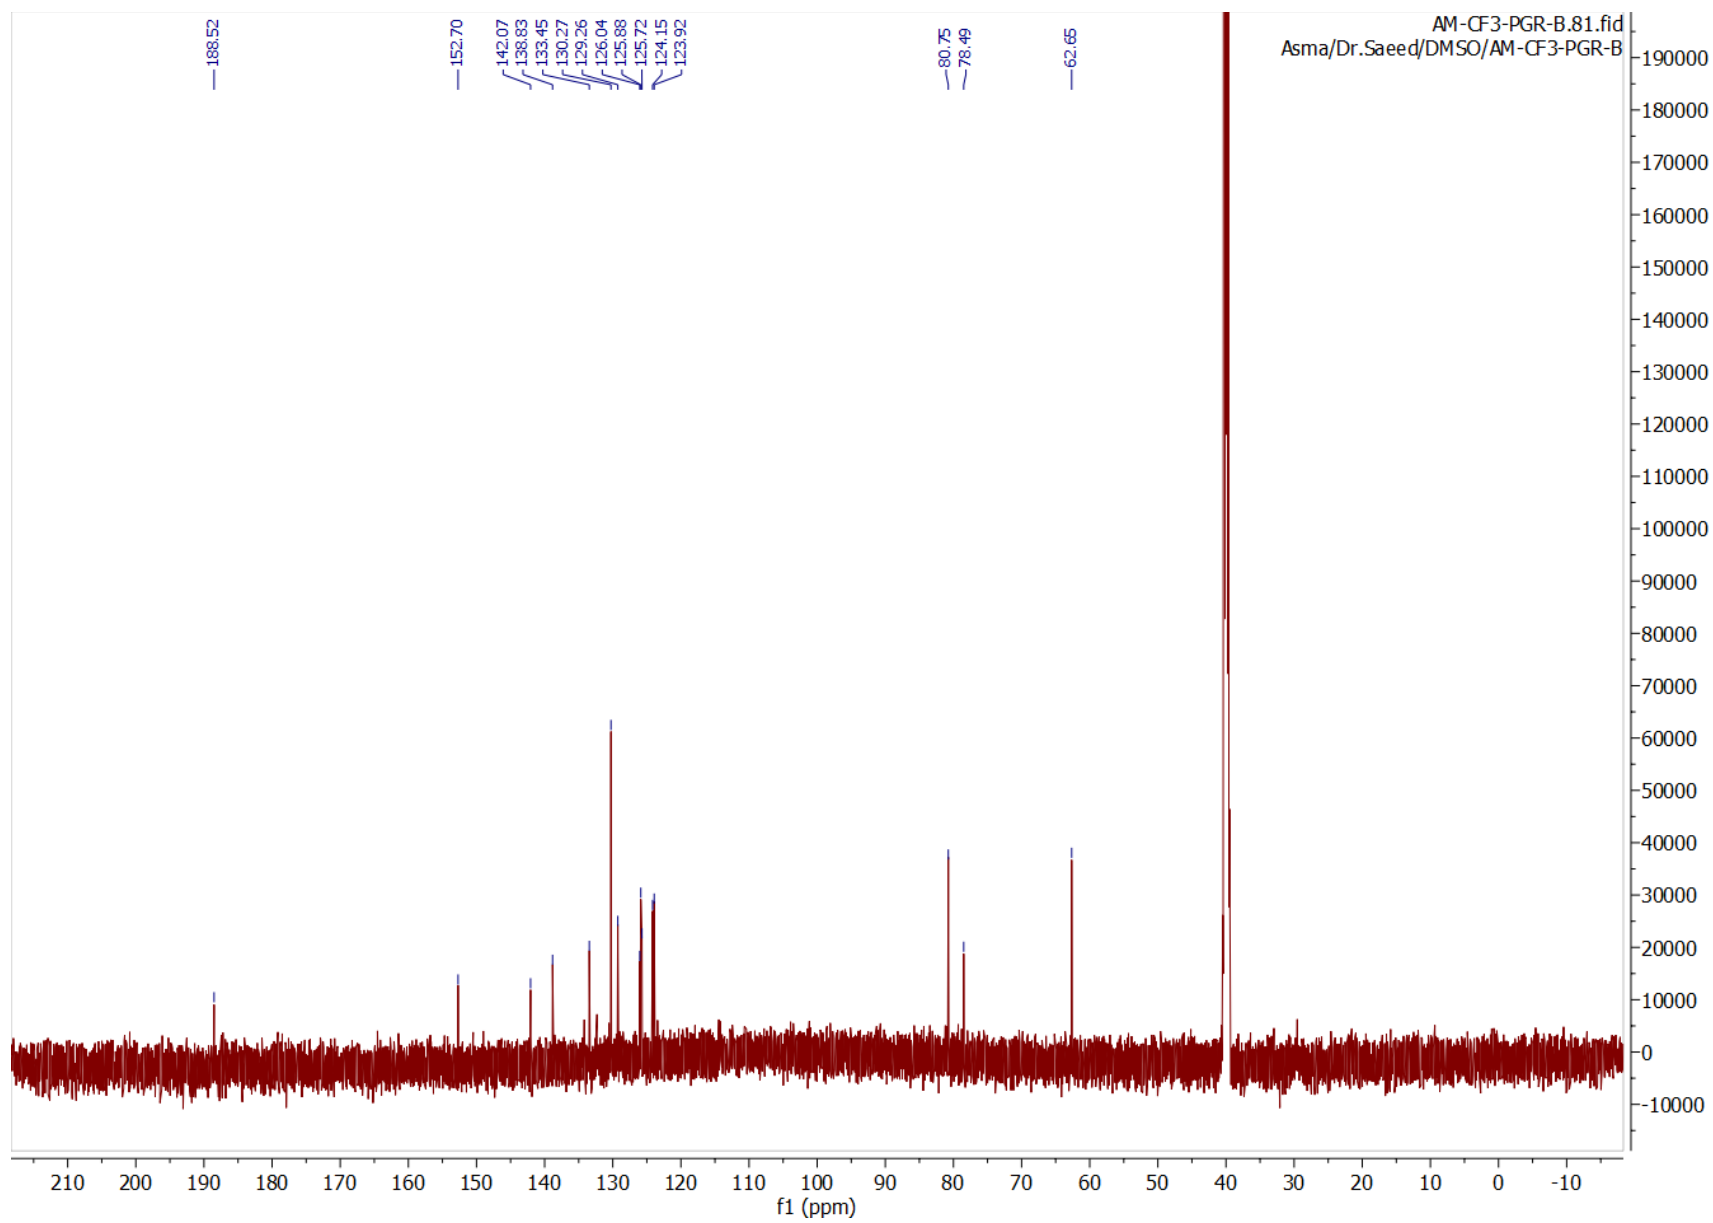

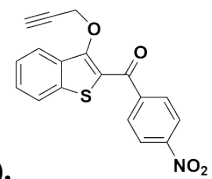

(4-nitrophenyl)(3-(prop-2-yn-1-yloxy)benzo[b]thiophen-2-yl)methanone (11c).

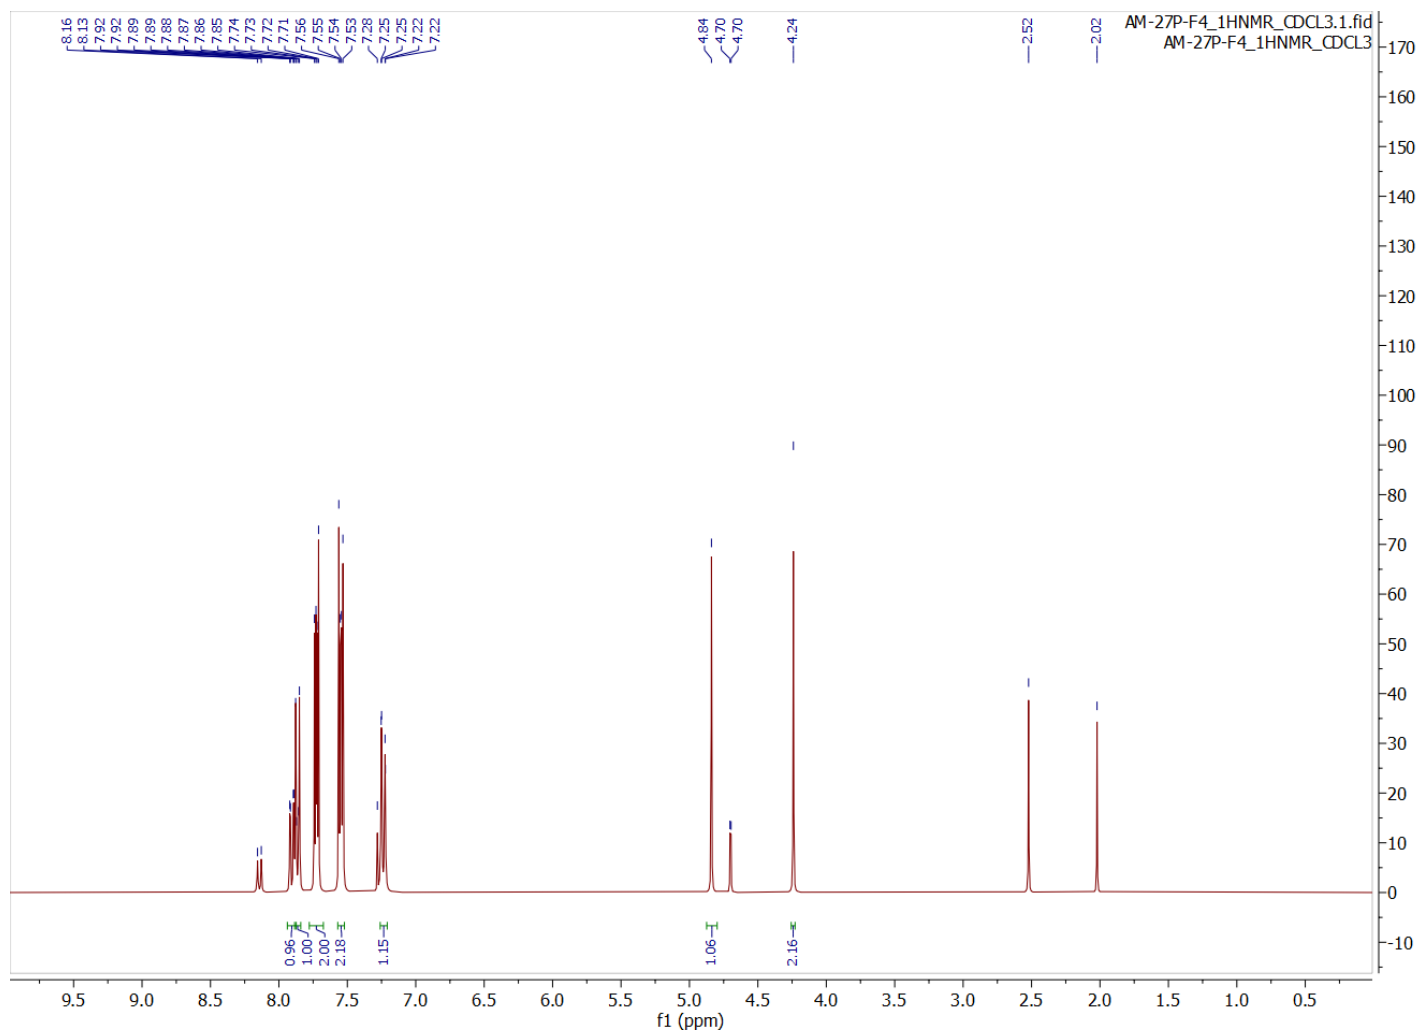

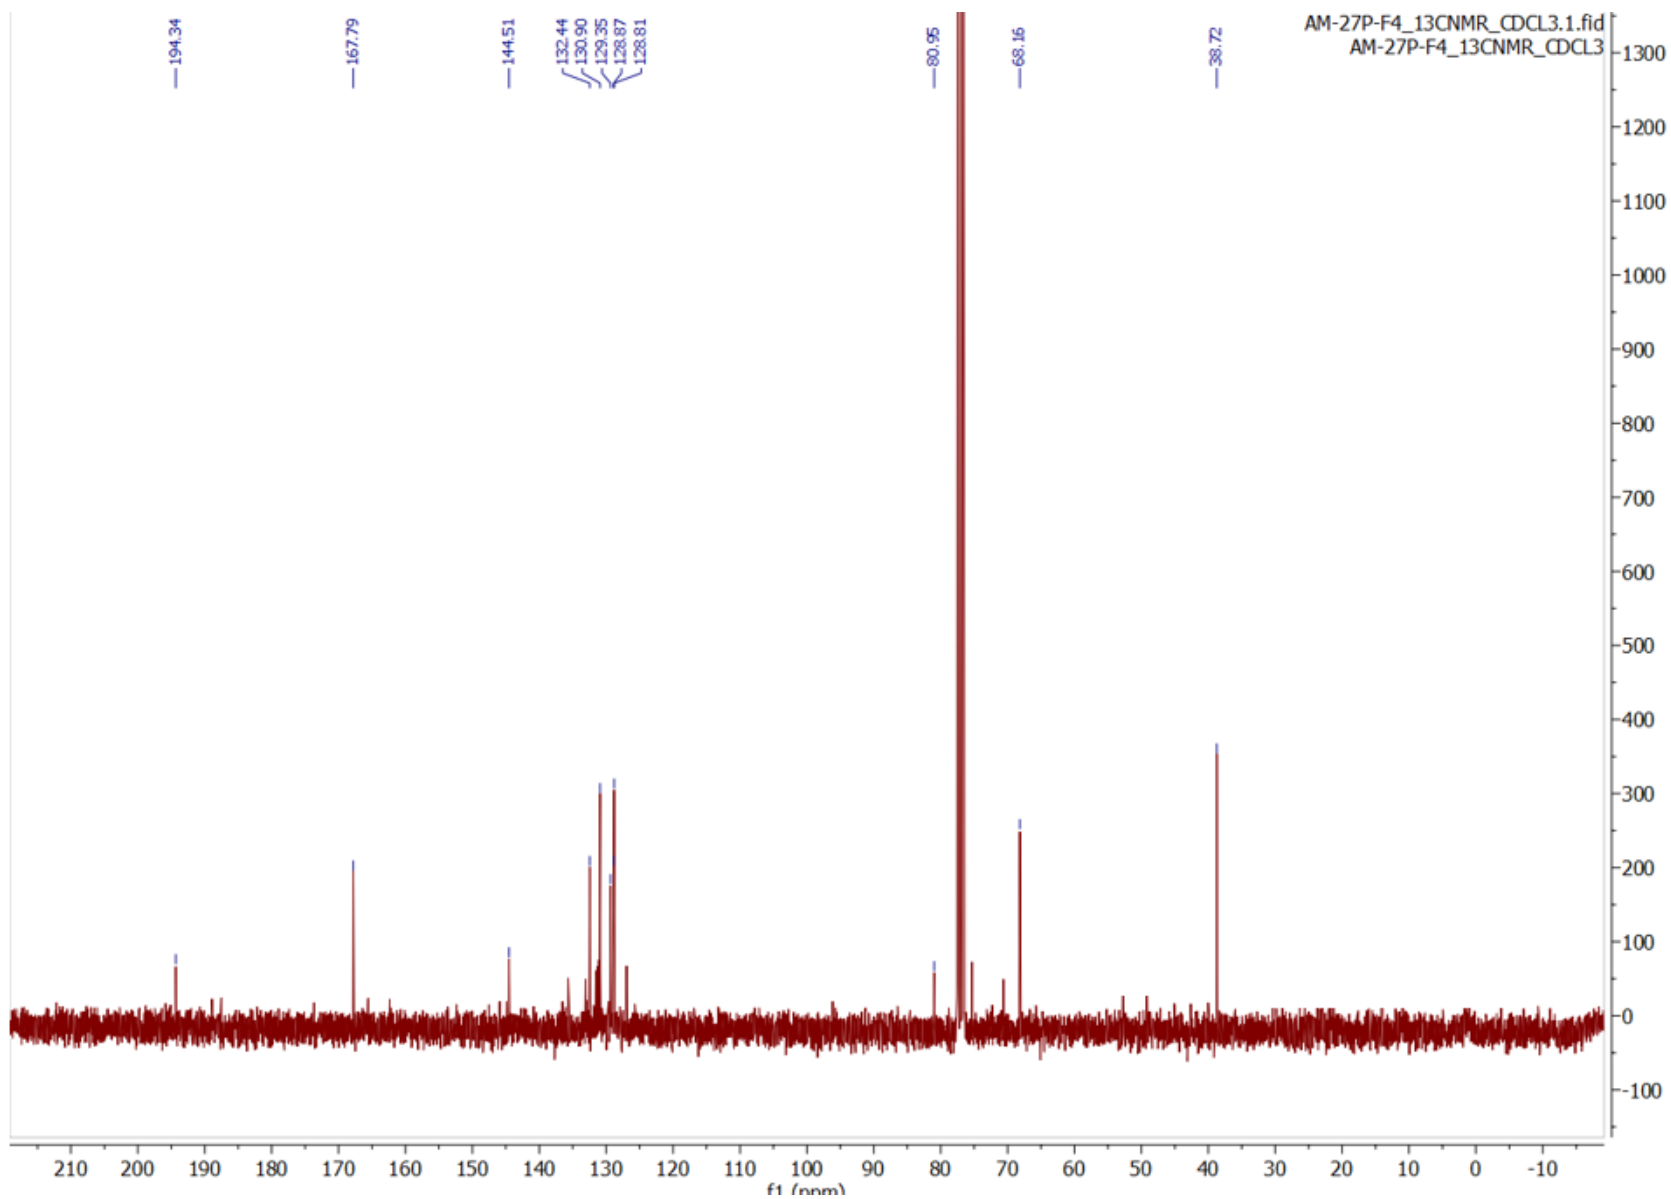

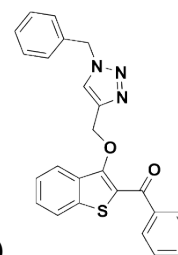

**(3-((1-benzyl-1H-1,2,3-triazol-4-yl)methoxy)benzo[b]thiophen-2-yl)(phenyl)methanone (14a)**

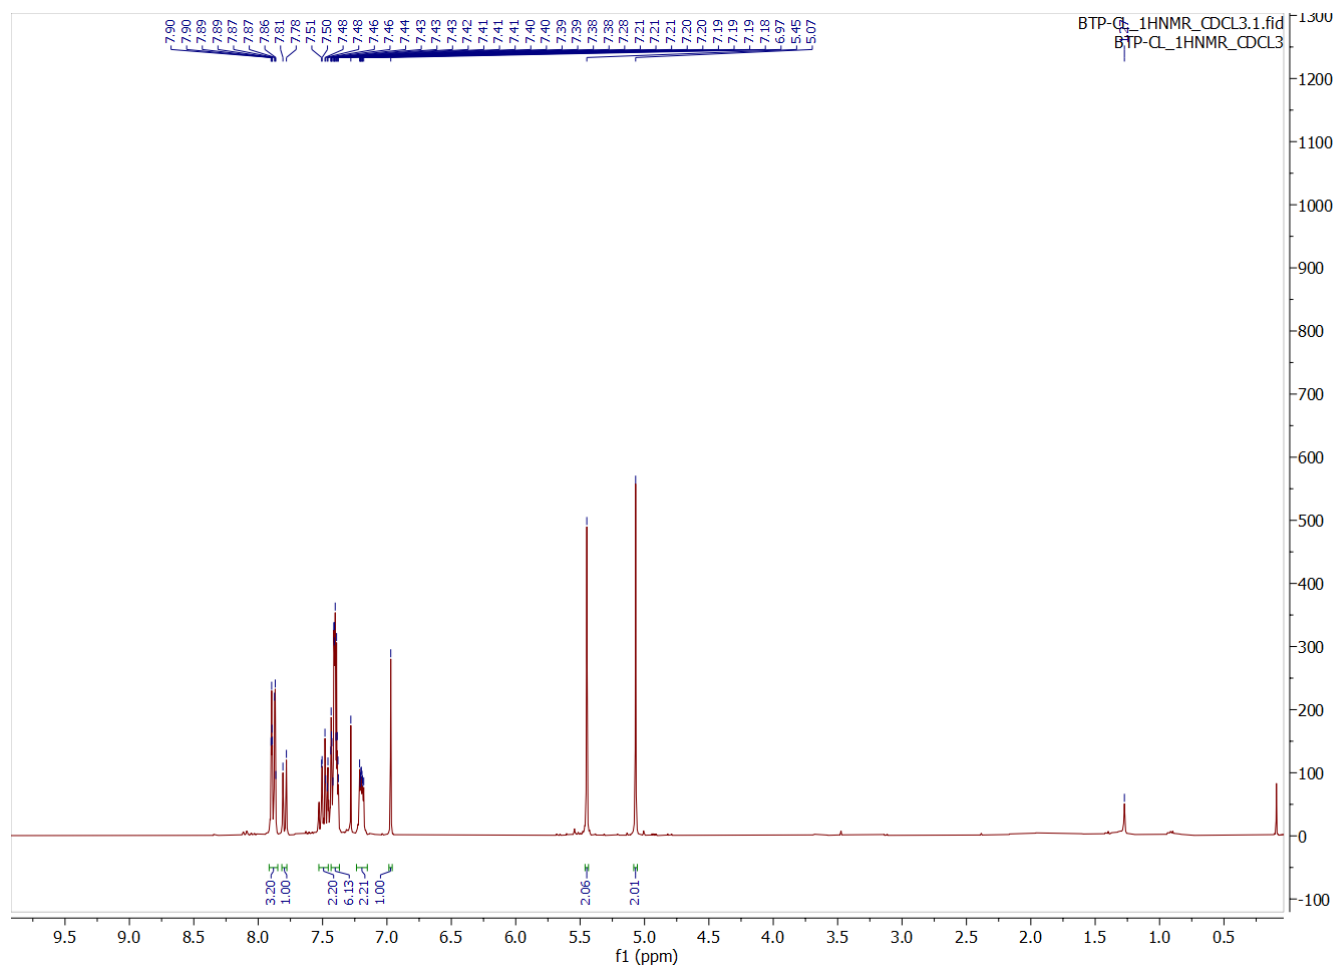



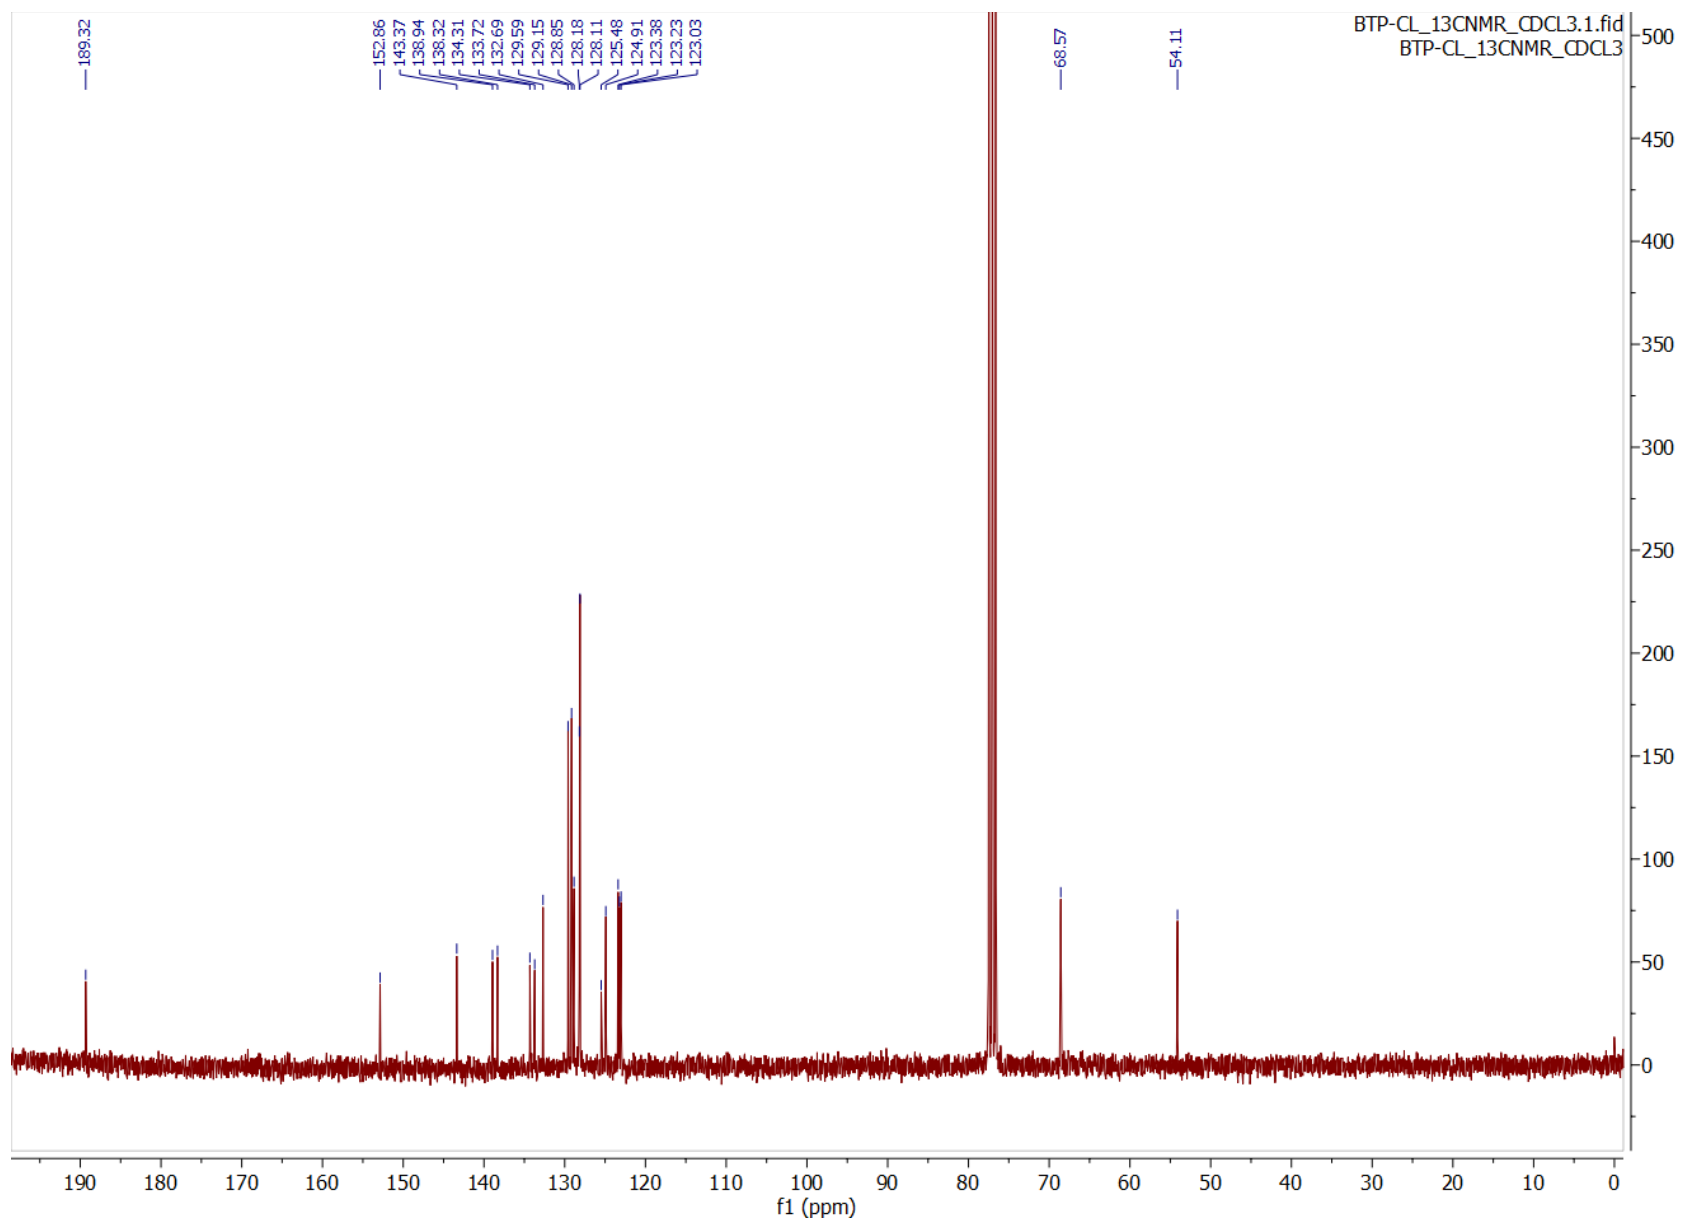

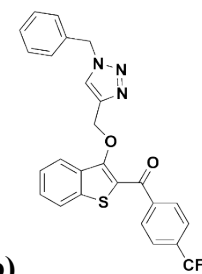

(3-((1-benzyl-1H-1,2,3-triazol-4-yl)methoxy)benzo[b]thiophen-2-yl)(4-(trifluoromethyl)phenyl)methanone (14b)

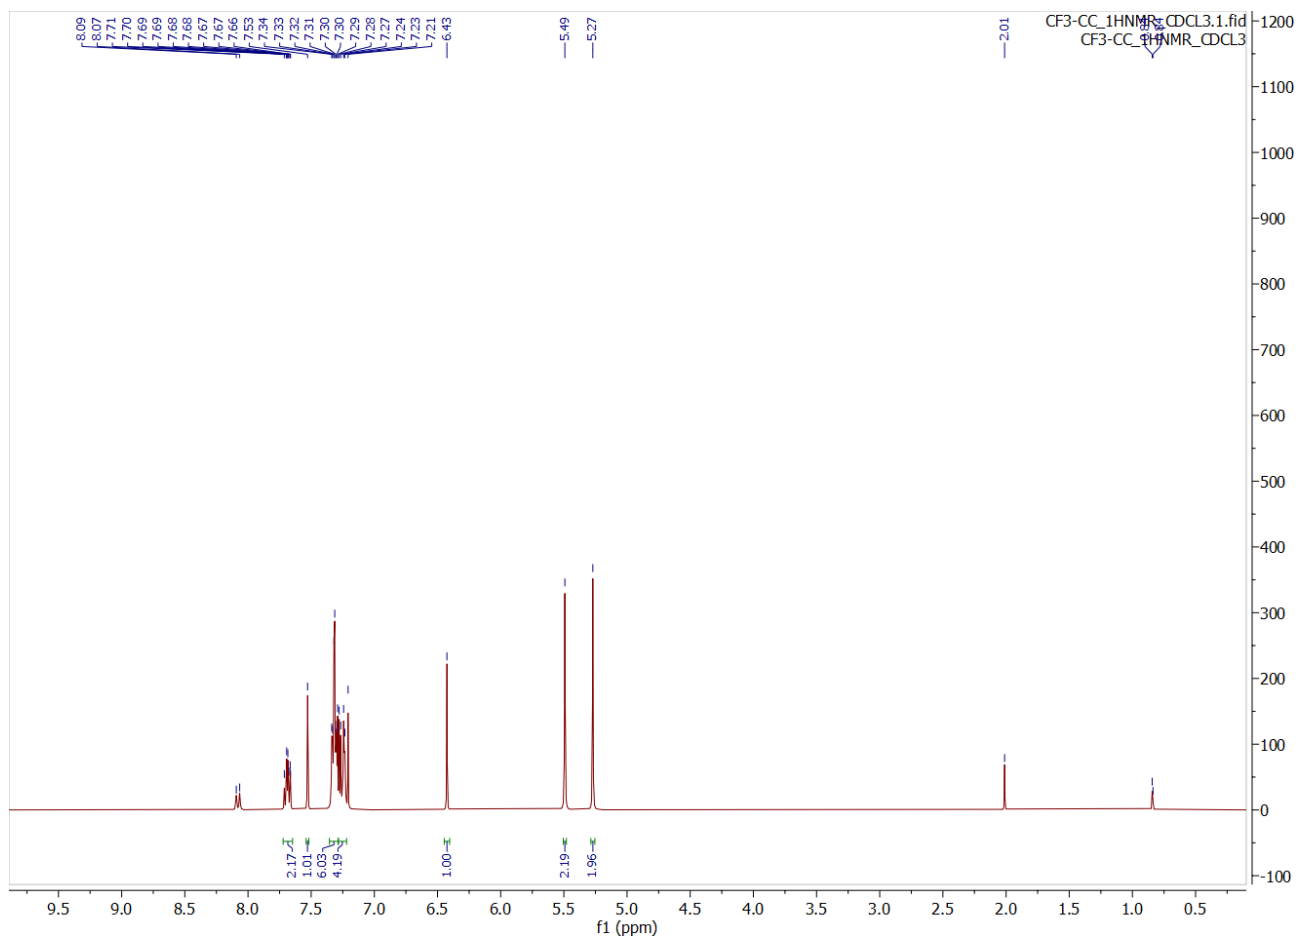

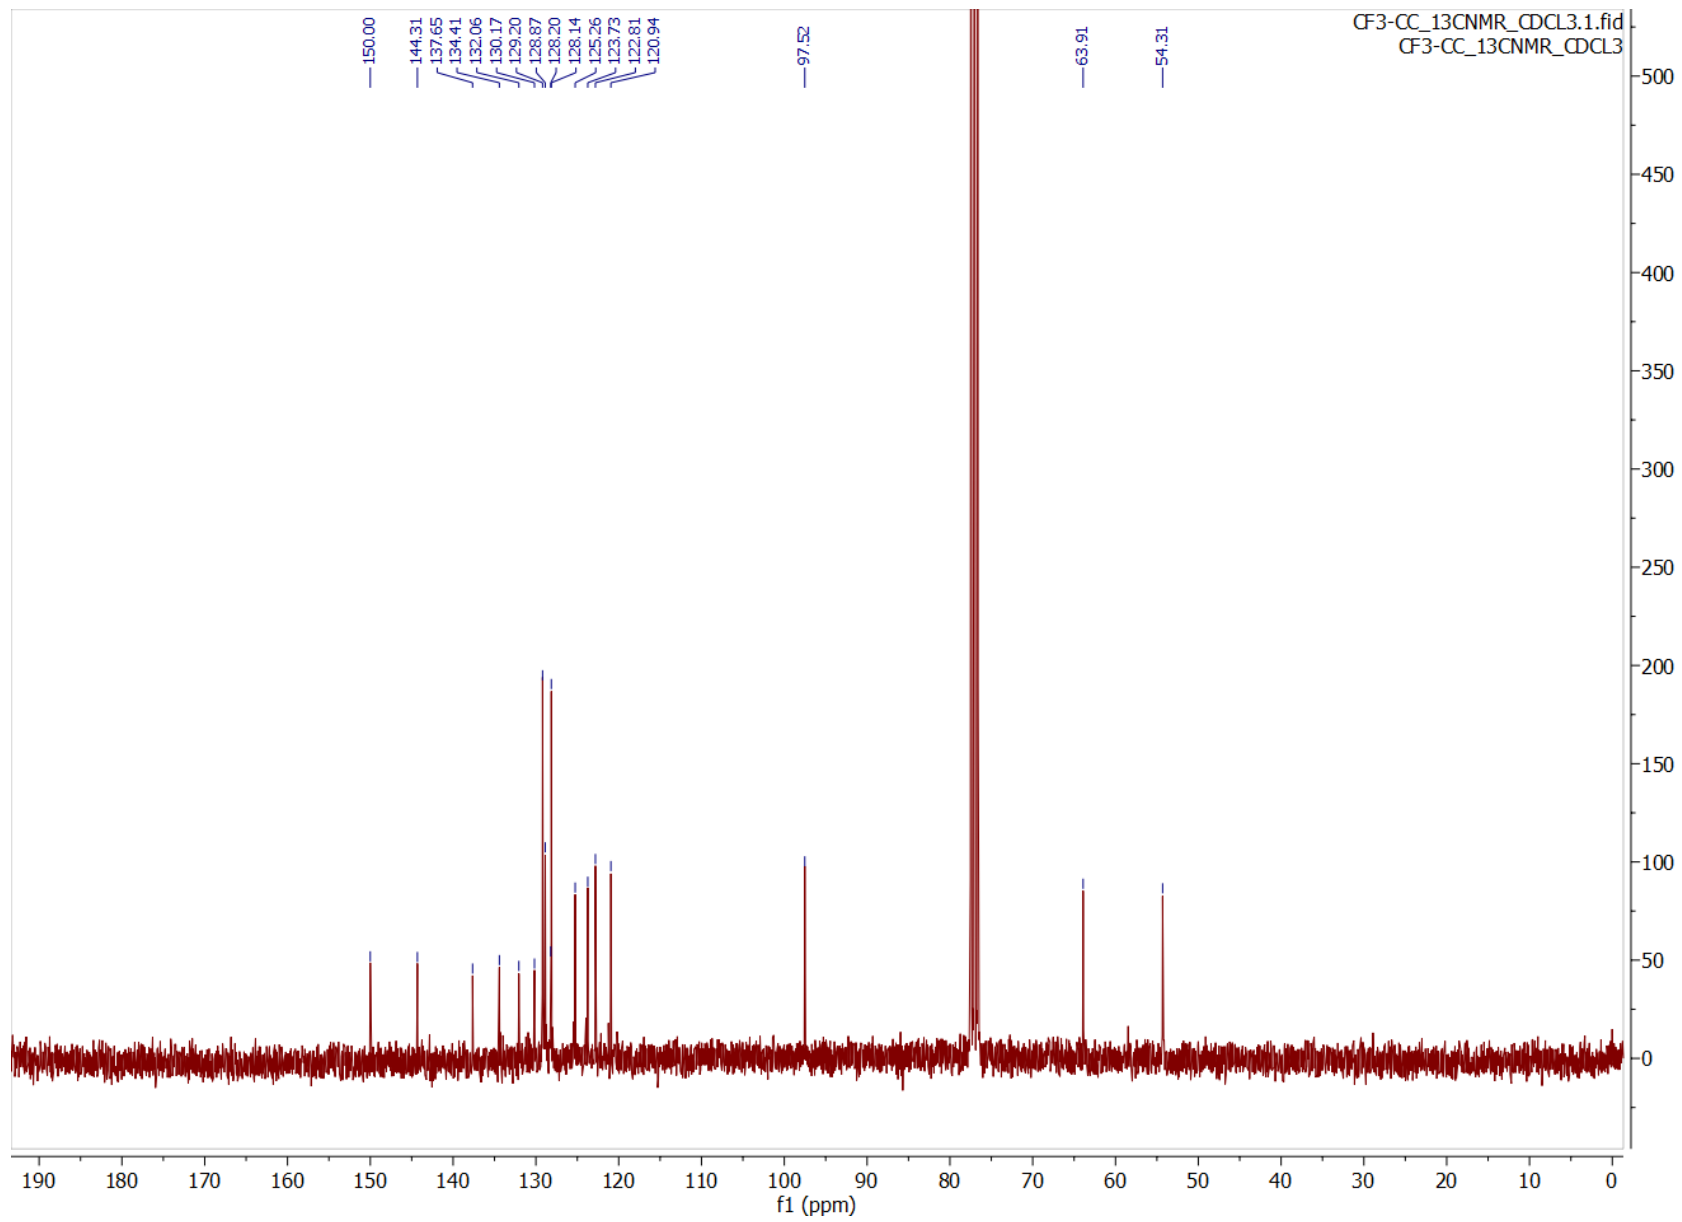

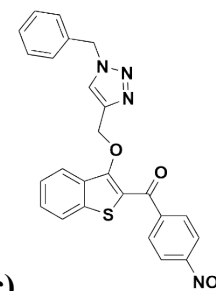

**(3-((1-benzyl-1H-1,2,3-triazol-4-yl)methoxy)benzo[b]thiophen-2-yl)(4-nitrophenyl)methanone (14c)**

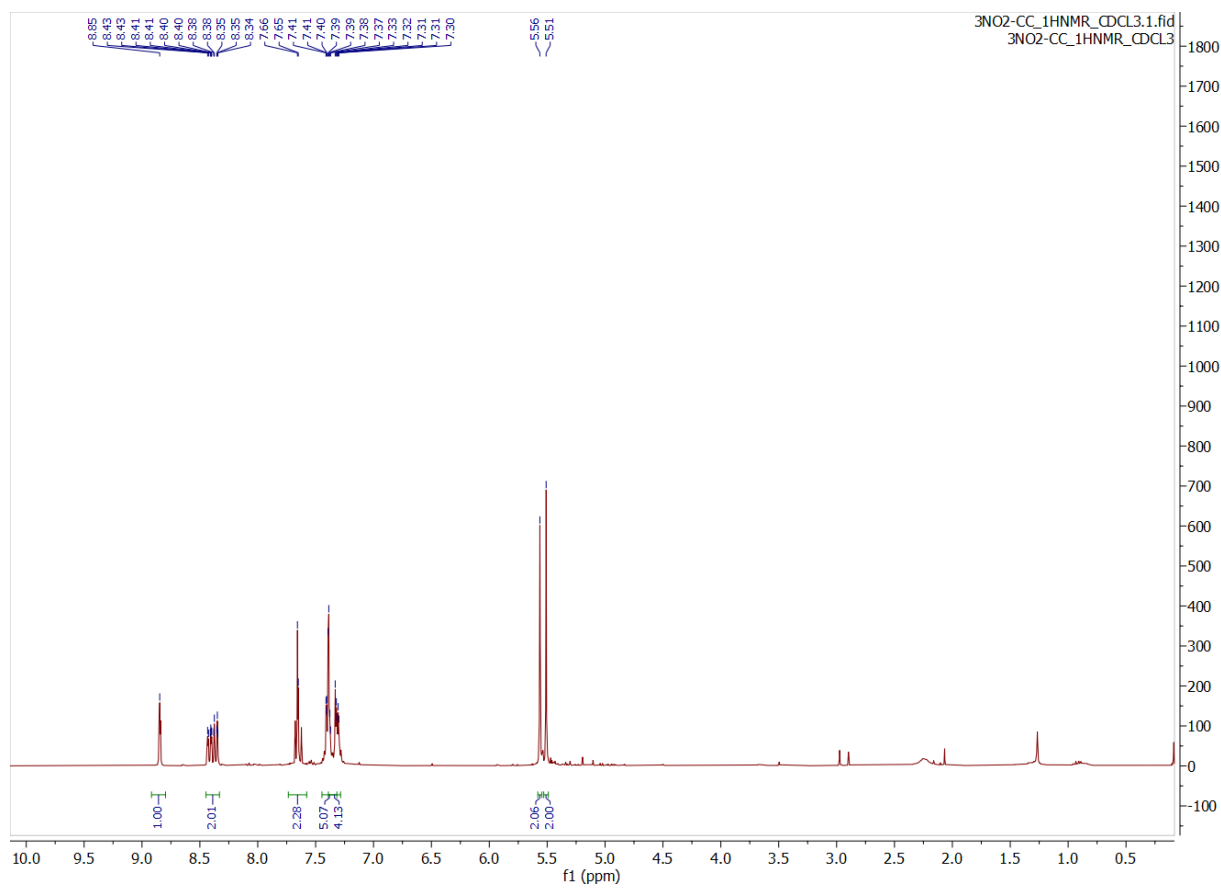

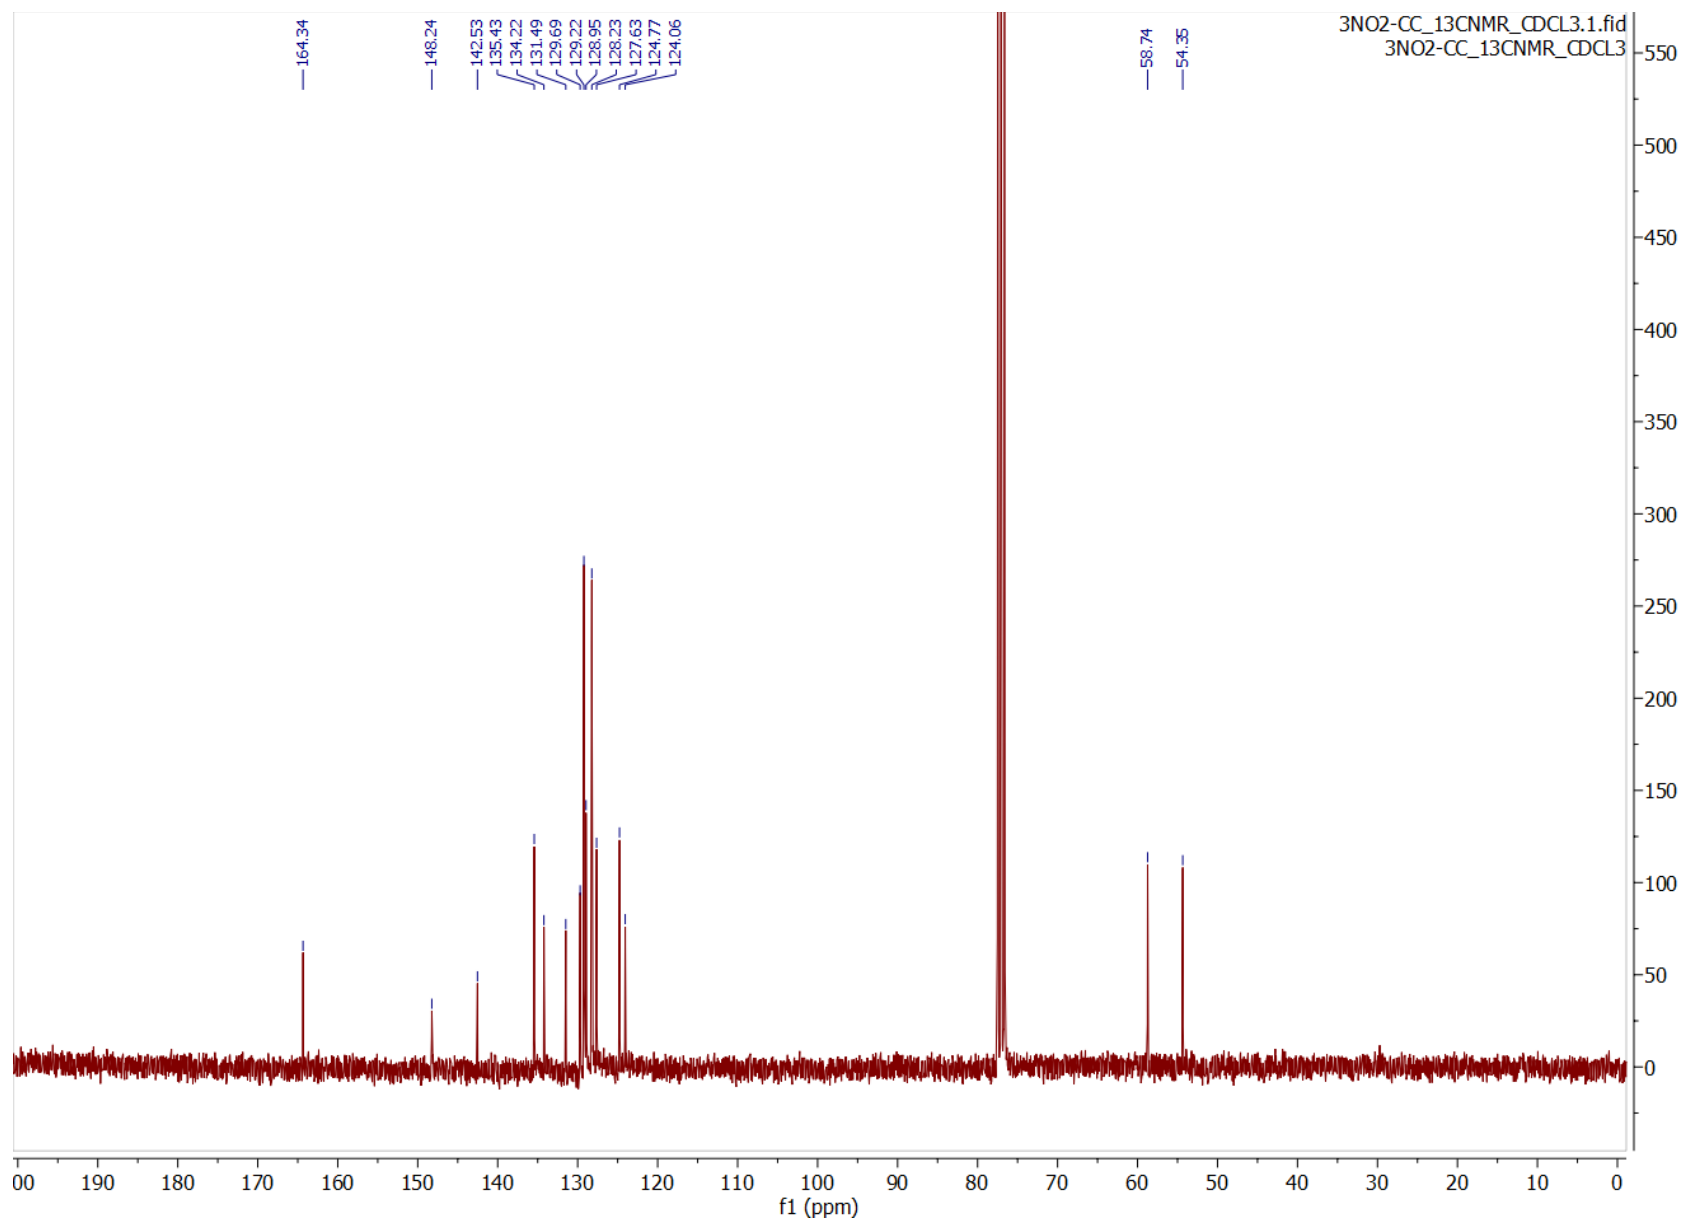

Supplement: d4ra01146e1.pdf [file d4ra01146e1.pdf]
